# Supplementary material for: Determinants of patient choice for hospital readmission after township hospitalisation: a population-based retrospective study in China
Source: PubMed Central journal article supplement — BMJ Open. 2018 Aug 8;8(8):e021516. doi: 10.1136/bmjopen-2018-021516 (PMC6089325; doi:10.1136/bmjopen-2018-021516), 2018-08-08
Supplement: bmjopen-2018-021516.draft_revisions.pdf [file bmjopen-2018-021516.draft_revisions.pdf]

# BMJ Open

BMJ Open is committed to open peer review. As part of this commitment we make the peer review history of every article we publish publicly available.

When an article is published we post the peer reviewers' comments and the authors' responses online. We also post the versions of the paper that were used during peer review. These are the versions that the peer review comments apply to.

The versions of the paper that follow are the versions that were submitted during the peer review process. They are not the versions of record or the final published versions. They should not be cited or distributed as the published version of this manuscript.

BMJ Open is an open access journal and the full, final, typeset and author-corrected version of record of the manuscript is available on our site with no access controls, subscription charges or pay-per-view fees (<http://bmjopen.bmj.com>).

If you have any questions on BMJ Open's open peer review process please email [info.bmjopen@bmj.com](mailto:info.bmjopen@bmj.com)

# BMJ Open

## **Determinants of Patient Choice for Hospital Readmission after Township Hospitalisation: A Population-Based Retrospective Cohort Study in China**

|                               |                                                                                                                                                                                                                                                                                |
|-------------------------------|--------------------------------------------------------------------------------------------------------------------------------------------------------------------------------------------------------------------------------------------------------------------------------|
| Journal:                      | <i>BMJ Open</i>                                                                                                                                                                                                                                                                |
| Manuscript ID                 | bmjopen-2018-021516                                                                                                                                                                                                                                                            |
| Article Type:                 | Research                                                                                                                                                                                                                                                                       |
| Date Submitted by the Author: | 06-Jan-2018                                                                                                                                                                                                                                                                    |
| Complete List of Authors:     | Zhang, Yan; Huazhong University of Science and Technology Tongji Medical College, School of Medicine and Health Management<br>Yadong, Niu; Huazhong University of Science and Technology<br>ZHANG, LIANG; Huazhong University of Science and Technology Tongji Medical College |
| Keywords:                     | readmission, choice, county hospital, patient flow, rural China                                                                                                                                                                                                                |
|                               |                                                                                                                                                                                                                                                                                |

SCHOLARONE™  
Manuscripts

Peer Review Only

1  
2  
3  
4 **1 Determinants of Patient Choice for Hospital Readmission after**  
5  
6  
7 **2 Township Hospitalisation: A Population-Based Retrospective Cohort**  
8  
9 **3 Study in China**  
10  
11  
12  
13

14 Yan Zhang<sup>1,2</sup>, Yadong Niu<sup>1,2</sup>, Liang Zhang<sup>1,2</sup> §  
15  
16  
17  
18

19 <sup>1</sup> School of Medicine and Health Management, Tongji Medical College, Huazhong  
20 University of Science and Technology, Wuhan, Hubei, 430030, China  
21  
22

23 <sup>2</sup> Research Centre for Rural Health Service, Key Research Institute of Humanities &  
24 Social Sciences of Hubei Provincial Department of Education, Wuhan, Hubei,  
25 430030, China  
26  
27  
28  
29  
30  
31  
32  
33

34 **Email addresses:**  
35

36 Y.Z. Yan Zhang Ph.D. yanzhang@hust.edu.cn  
37

38 Y-D. N. Yadong Niu M.D. nyadong@126.com  
39

40 L.Z. Liang Zhang M.D. zhangliang@mails.tjmu.edu.cn  
41  
42  
43  
44  
45

46 **§Corresponding author:**  
47

48 Liang Zhang, zhangliang@mails.tjmu.edu.cn  
49  
50  
51  
52

53 **Word Count:** 3186  
54  
55  
56  
57  
58  
59  
60

## Abstract

**Objective:** The lack of coordinated and appropriate healthcare across sectors has produced more patients for county hospitals. This research aimed to examine the differences in the choices between township and county hospitals for readmission after a township hospitalisation and the determinants that influence choice for hospital readmission.

**Design:** A retrospective cohort study drew out readmissions cross hospitals after first admission in township hospital, and the differences between township–township inpatients (TT group) and township-county inpatients (TC group) were compared. Moreover, a two-level logistic regression model was used to examine the determinants of choice for hospital readmission through MLwiN 2.30.

**Setting:** A population-based health utilisation database was used in Qianjiang District, China, from January 1, 2008 to December 31, 2013.

**Participants:** The study focused on readmitted individuals whose first admission was in township hospital. The readmission cases were identified with the same diagnosis in hospitalisation according to the ICD-10 within 30 days. In total, 6,764 readmissions had first admissions in township hospital.

**Primary outcome measures:** Patient choice for hospital readmission after township hospitalisation

**Results:** TT group accounted for 62.5% (4,225) and TC group accounted for 37.5% (2,539) in six years. These incidence rates varied in different towns ( $P < 0.001$ ). The notable differences between TC and TT group characteristics are as follows: length of

1  
2  
3  
4 45 stay (LOS) of first admission (6.96 versus 9.23), average interval (6.03 versus 14.95)  
5  
6 46 and disease category. Admitting year, age, arrival time to county hospital, inpatient  
7  
8 47 interval, LOS in first admission and disease category were the determinants of choice  
9  
10  
11 48 for hospital readmission.

12  
13 49 **Conclusions:** Patients whose first admission was in a township hospital were more  
14  
15 50 likely to be readmitted to a county hospital year by year. Reducing the incidence and  
16  
17 51 decreasing patient dissatisfaction are the focused actions to rebuild the healthcare  
18  
19 52 delivery system in rural China.

20  
21 53 **Keywords:** readmission, choice, county hospital, patient flow, rural China  
22  
23  
24  
25

## 26 54 **Article summary**

- 27  
28  
29 55 • This is the first study to introduce township-county readmission, the unique form of  
30  
31 56 hospitalisation in rural China.  
32  
33  
34 57 • Population-level data on readmission is seldom reported across different level  
35  
36 58 hospitals. A two-level logistic regression model was used for the consideration of  
37  
38 59 aggregation at the town level.  
39  
40  
41 60 • Findings in this research reveal the dissatisfied township-county readmission is a  
42  
43 61 probable cause of inappropriate level of hospitalisation for the first time.  
44  
45 62 • The combination of first LOS and interval may be an effective identification index  
46  
47 63 to identify the forms of township-county readmission.  
48  
49 64 • Hospitalisation information, geographical factor, referral status and disease were all  
50  
51 65 drawn into the logistic regression model, but some individual factors were deficient.  
52  
53  
54  
55  
56  
57  
58  
59  
60

## 66 **Background**

67 Readmission is an episode where an inpatient is readmitted for once disease with  
68 30-day. <sup>[1, 2]</sup> In most studies, readmission findings reflect that inpatient care did not  
69 meet patient requirements, and readmission rate is used as an evaluation index of  
70 hospitalisation quality. <sup>[3]</sup> Readmission usually occurs in the same hospital,  
71 sometimes across hospitals because of the disease variability. <sup>[4]</sup> However, in rural  
72 China, multi-level institutional readmission is a popular and important healthcare  
73 utilisation, which reflects the defects of China's healthcare delivery system, instead of  
74 hospitalisation quality, especially township–county (TC) readmission. TC readmission  
75 is a health-seeking behaviour in which inpatients ask for healthcare services first in a  
76 township hospital and second in a county hospital, whether planned or unplanned,  
77 voluntarily or passively. TC readmission occurs constantly in rural China and  
78 accounts for approximately 4.0% of all inpatient services, currently. <sup>[5]</sup> It has become  
79 a common and inescapable healthcare utilisation. TC readmission usually occurs in  
80 two situations, namely, doctor suggestions and inappropriate individual choice.  
81 TC readmission as suggested by doctors occurs when a township doctor has an  
82 in-patient admission and finds that he/she cannot completely cure the patient or  
83 disease varied. <sup>[6]</sup> Consequently, the patient is referred directly to a county hospital or  
84 is advised to go to county hospitals for succeeding admission. This situation is caused  
85 by the fragmented healthcare delivery system in rural China, where residents seek  
86 care from a village–town–county three-tier healthcare delivery system, and all  
87 hospital services are supplied by township and county hospitals. <sup>[7]</sup> The higher the

1  
2  
3  
4 88 level of the institution, the stronger the service capability, the longer the distance and  
5  
6 89 the higher the medical cost. Town hospitals bear the responsibilities of transferring  
7  
8 90 patients, taking care of inpatients with general illnesses and advising patients with  
9  
10 91 severe diseases, which are beyond the capacity of township hospitals, to admit to  
11  
12 92 county hospitals. [8] In particular, township doctors sometimes receive patients whose  
13  
14 93 diseases are beyond their capacity because of their inaccurate judgment, or disease  
15  
16 94 varied, and it is hard to avoid.

17  
18  
19  
20  
21 95 TC readmission caused by inappropriate individual choices happens when patients  
22  
23 96 who should be readmitted to township hospitals choose to be admitted to county  
24  
25 97 hospital for personal reasons. [9] Some readmissions are influenced by the quality  
26  
27 98 problem of township hospitals, poor compliance on medicine and after-cure from  
28  
29 99 patients themselves or a normal disease recurrence. Nonetheless, patients cannot  
30  
31 100 recognise the accurate readmission reason and easily transfer the responsibility of  
32  
33 101 readmission to the township doctor, thinking of it as failed treatment and consequently  
34  
35 102 deciding to be readmitted to a county hospital. This situation is an inappropriate  
36  
37 103 readmission. [10]

38  
39  
40  
41  
42  
43 104 In the view of patients, no order or limitation on patient choice exists, and no GPs or  
44  
45 105 consultants are available in rural China. Residents freely choose hospitals and service  
46  
47 106 types, depending mainly on their judgment on the disease and the cognition on  
48  
49 107 hospitals. If patients choose a higher institution than needed, they pay more; if they  
50  
51 108 choose a lower institution than needed; they would be referred or readmitted. Thus,  
52  
53 109 the cost of incorrect decision is borne by the patient himself. To guarantee patient

1  
2  
3  
4 110 interests on TC readmission, the three-tier healthcare delivery system required  
5  
6 111 different level hospitals to cooperate with one another in providing continuous  
7  
8 112 healthcare services. In reality however, communications among township and county  
9  
10  
11 113 professional providers are limited, and no document sharing and interactions among  
12  
13 114 providers across the three tiers are virtually present.<sup>[11]</sup> County doctors do not deliver  
14  
15 115 continued care for readmitting patients on the account of income incentives and risk  
16  
17 116 aversion, and patients readmitted to a county hospital usually get a new treatment.<sup>[12]</sup>  
18  
19 117 Furthermore, compared with patients admitted directly to county hospitals,  
20  
21 118 readmitting patients pay more time and costs and even miss the best kind of treatment.  
22  
23 119 As a result, when diseases occur subsequently, and patients are unable to judge the  
24  
25 120 severity of the disease, they would tend to choose the county hospital directly for  
26  
27 121 admission, taking on excess economic risk to avoid delay. Some studies defined TC  
28  
29 122 readmission as failed treatment in the view of patients and prove that TC readmission  
30  
31 123 experience can influence the patient choice of hospitals afterwards.<sup>[13, 14]</sup> Gradually,  
32  
33 124 inpatients will be more likely to gather in county hospitals compared with township  
34  
35 125 hospitals; in fact, this kind of phenomenon is already happening. The annual growth  
36  
37 126 rate of inpatients in county hospital is 6.75% whereas that of township hospital  
38  
39 127 inpatients is 0.63% from 2010 to 2016.<sup>[15]</sup>  
40  
41 128 The first point of contact at primary medical institutions is the most efficient supply  
42  
43 129 model, as proven by medical practices around the world. While TC readmission can  
44  
45 130 easily result in inappropriate patient flow, patient admission to a higher-level hospital  
46  
47 131 than necessary leads to significant waste. TC readmission has become a determinant



1  
2  
3  
4 132 of increasing health expenditure. [13] Chinese government is seeking to solidify the  
5  
6 133 fragmented three-tier healthcare delivery system through the first point of care in  
7  
8 134 primary institutions and collaboration between township and county hospitals. Given  
9  
10 135 the current situation, guiding patients to choose the correct hospital for readmission  
11  
12 136 has rationally been a necessary consideration and a key content, and thus, the  
13  
14 137 identification of the choice for hospital readmission could be the first step. This  
15  
16 138 research focuses particularly on the choices for hospital readmissions, considering  
17  
18 139 that the first admission of an inpatient was in a township hospital, and makes clear  
19  
20 140 determinants of choice for hospital readmission.  
21  
22  
23  
24  
25

## 26 141 **Methods**

### 27 28 29 142 **Study setting**

30  
31  
32 143 We focused on individuals who had been discharged from participant hospitals. The  
33  
34 144 readmission cases were identified as the same diagnosis in hospitalisation between  
35  
36 145 county and township hospitals within 30 days. From a design of population-based  
37  
38 146 retrospective cohort, we compared the difference between township–township  
39  
40 147 readmitted inpatients (TT group) and TC readmitted inpatients (TC group).  
41  
42  
43  
44  
45

### 46 148 **Data source**

47  
48 149 Qianjiang District was designated as the sample area through cluster sampling. It is a  
49  
50 150 typical rural area located in Chongqing and is the largest municipality in southwest  
51  
52 151 China. Qianjiang has a per capita GDP of 3984\$, which is below the average GDP in  
53  
54 152 China. The resident population is 550 thousand, and all residents are covered under  
55  
56  
57  
58  
59  
60

1  
2  
3  
4 153 the New Rural Cooperative Medical System (NRCMS), where all residents could  
5  
6 154 receive reimbursement for inpatient care. Two county hospitals and 30 township  
7  
8 155 hospitals are in Qiangjiang District, and all township hospitals were divided into four  
9  
10 156 levels according to their scale and service quantity (Fig. 1). This study was based on  
11  
12 157 the NRCMS inpatient database in Qianjiang District, which contains all inpatient  
13  
14 158 utilisation of all population. In this database, a case means a single hospitalisation,  
15  
16 159 county or township hospitalisation.  
17  
18  
19  
20

## 21 160 **Data processing**

22  
23  
24 161 This retrospective cohort study drew out all readmissions whose first inpatient  
25  
26 162 admission was in a township hospital. Samples were selected by MS Excel 2010  
27  
28 163 based on the NRCMS database from January 1, 2008 to December 31, 2013. First,  
29  
30 164 cases that shared the same patient identifier and the same disease codes were sorted  
31  
32 165 together in a chronological order. Second, we calculated the time interval in every  
33  
34 166 adjacent two cases of the same inpatient for the same disease; if the interval time was  
35  
36 167 less than 31 days, then the patient would be marked as a readmission patient. Then, if  
37  
38 168 the former inpatient of the readmission occurred in a township hospital, and the later  
39  
40 169 occurred in county hospital, the two cases would be merged as one case and is marked  
41  
42 170 as a TC readmission, and the patient would be marked as TC patient. TT and TT  
43  
44 171 patients were treated in the same way. Finally, all TC and TT cases were extracted  
45  
46 172 into a new database. Complementally, the diagnosis of the same disease may change  
47  
48 173 among different doctors, in different institutions or at different time; thus, we adjusted  
49  
50 174 the original ICD-10 disease code to a broader code (taking chronic obstructive  
51  
52  
53  
54  
55  
56  
57  
58  
59  
60

175 pulmonary disease for example, and its disease code was adjusted from J44.900 to  
 176 J44), which may improve accuracy of readmitting patients. After screening, the  
 177 number of readmitting patients in the sample county was 6,764 from 2008 to 2013.  
 178 Sociological characteristics, such as gender, age, arrival time to county hospital, first  
 179 inpatient information including length of stay (LOS), expenses, disease category,  
 180 capacity of the township hospital, interval information and readmitted hospital  
 181 choice,<sup>[16]</sup> were collected to build a final database. The distance and arrival time to  
 182 county hospital of all readmitting patients were captured by Google Map individually.  
 183 This study was registered in the Chinese Clinical Trial Registry  
 184 (ChiCTR-OOR-14005563), and patient information was anonymised and  
 185 de-identified prior to analysis.

### 186 **Statistical analysis**

187 Both treatment capacity of township hospital and arrival time to county hospital were  
 188 could be the influencing factors of choice for hospital readmission. The obtained data  
 189 indicated a hierarchical structure, and the 6,764 records may be aggregated by town  
 190 level. The determinants of choice for hospital readmission were examined using  
 191 multilevel binomial logistic regression analysis by MLwiN 2.30, which was  
 192 developed by the University of Bristol, UK. <sup>[17]</sup> The regression model is as follows.

$$193 \quad \text{logit}(\pi_{ij}) = \beta_0 \text{cons} + \beta_1 \text{Admitted Year}_{ij} + \beta_2 \text{Gender}_{ij} + \beta_3 \text{Age}_{ij} + \beta_4 \text{Distance}_{ij} + \beta_5 \text{Time}_{ij} \\ + \beta_6 \text{Capacity}_{ij} + \beta_7 \text{1}^{\text{st}} \text{LOS}_{ij} + \beta_8 \text{1}^{\text{st}} \text{Expends}_{ij} + \beta_9 \text{Interval}_{ij} + \text{More14}_{ij}$$

$$194 \quad \beta_{0j} = \beta_0 + u_{0j}$$

195  $\beta_i$  refers to the fixed effects parameter,  $u_{0j}$  refers to the random effects of level 2.

## 196 Results

### 197 Choices for hospital readmission after township hospitalisation

198 In 2008–2013, 6,764 first readmissions in township hospital occurred among 271,405  
 199 discharged admissions, where TT group accounted for 62.5% (4,225) and TC group  
 200 accounted for 37.5% (2,539), as shown in Table 1. The number of readmissions  
 201 increased sharply, whereas the proportion of readmissions in the total inpatients  
 202 changed a little, nearly 5.0%. TC group increased from 1.66% to 1.89% from 2008 to  
 203 2013.

204 **Table 1. Amounts of readmissions in each year, Qianjiang district, 2008–2013**

| Year         | All inpatients | Readmissions* n (%)** | Choice for hospital readmission** |                | P      |
|--------------|----------------|-----------------------|-----------------------------------|----------------|--------|
|              |                |                       | TT group n (%)                    | TC group n (%) |        |
| 2008         | 21,823         | 524 (4.8)             | 342 (3.13)                        | 182 (1.66)     | <0.001 |
| 2009         | 34,240         | 1,076 (6.29)          | 724 (4.03)                        | 352 (2.05)     |        |
| 2010         | 35,866         | 942 (5.25)            | 608 (3.39)                        | 334 (1.86)     |        |
| 2011         | 50,616         | 1,260 (4.98)          | 797 (3.14)                        | 463 (1.82)     |        |
| 2012         | 61,467         | 1,384 (4.5)           | 815 (2.56)                        | 569 (1.85)     |        |
| 2013         | 67,392         | 1,578 (4.68)          | 939 (2.78)                        | 639 (1.89)     |        |
| <b>Total</b> | 271,405        | 6,764 (4.98)          | 4225 (3.11)                       | 2539 (1.87)    |        |

205 \*Readmission here refers to readmission whose first admission was in a township hospital.

206 \*\*One readmission includes two admissions.

207 Readmission occurred variedly in different towns, as shown in Table 2. Chengnan  
 208 town had the lowest readmission ratio (2.95%) and the lowest TT readmission ratio  
 209 (1.52%) in 30 towns, Heixi town had the lowest TC readmission ratio (1.30%), Shijia  
 210 town had the highest TC readmission ratio (2.86%) and Jindong town had the highest  
 211 TT readmission ratio (5.49%) and readmission ratio (6.96%).

212 **Table 2. Amounts of readmissions in each town, Qianjiang district, 2008–2013**

| Town | All inpatients | Readmissions* n (%)** | Choice for hospital readmission** |                | P |
|------|----------------|-----------------------|-----------------------------------|----------------|---|
|      |                |                       | TT group n (%)                    | TC group n (%) |   |

|              |                |                     |                    |                    |        |
|--------------|----------------|---------------------|--------------------|--------------------|--------|
| Chengnan     | 11,716         | 173 (2.95)          | 89 (1.52)          | 84 (1.43)          |        |
| Heixi        | 9,073          | 137 (3.02)          | 78 (1.72)          | 53 (1.30)          |        |
| Shaba        | 8,778          | 152 (3.46)          | 81 (1.58)          | 71 (1.62)          |        |
| ~            | ~              | ~                   | ~                  | ~                  | <0.001 |
| Shijia       | 8,605          | 223 (5.18)          | 100 (2.32)         | 123 (2.86)         |        |
| ~            | ~              | ~                   | ~                  | ~                  |        |
| Jindong      | 6,007          | 209 (6.96)          | 165 (5.49)         | 44 (1.46)          |        |
| <b>Total</b> | <b>271,405</b> | <b>6,764 (4.98)</b> | <b>4225 (3.11)</b> | <b>2539 (1.87)</b> |        |

213 \* Readmission here refers to readmission whose first admission was in a township hospital.

214 \*\*One readmission includes two admissions.

### 215 **Characteristics of readmitting patients between TT and TC groups**

216 Table 3 shows the characteristics of the subject patients during 2008–2013. Male  
 217 patients accounted for 48.7% in TC group, higher than that in the TT group (41.9%,  $P$   
 218 < 0.001). The readmission choices varied in different age groups ( $P$  < 0.001), and  
 219 patients aged more than 40 years old in TC group reached than a half (57.9%). The  
 220 highest rate of TC group in inpatient interval was fewer than 3 days (61.1%) and that  
 221 of TT group was 16–30 days (50.6%,  $P$  < 0.001). The average interval in TC group is  
 222 much lower than that in TT group (6.03 versus 14.95), the same result was showed in  
 223 terms of average LOS in first inpatient admission (6.96 versus 9.23) and arrival time  
 224 to county hospital (59.73 versus 61.79); the opposite results were observed in terms of  
 225 expenses in first inpatient admission (¥831.35 versus ¥791.01). TC group mostly  
 226 had respiratory diseases (37.7%) and digestive diseases (20.3%). No significant  
 227 differences among the distance to county hospital, and township hospital capacity  
 228 were observed between TT and TC groups.

229 **Table 3. Distributions of characteristics of readmissions ( $n = 6,764$ )**

| Variable | All n (%) | Choice for hospital readmission |                | $P$ |
|----------|-----------|---------------------------------|----------------|-----|
|          |           | TT group n (%)                  | TC group n (%) |     |

|                     |                 |               |                 |        |
|---------------------|-----------------|---------------|-----------------|--------|
| All                 | 6,764           | 4,225 (62.5)  | 2539(37.5)      |        |
| Gender              |                 |               |                 | <0.001 |
| Male                | 3,006 (44.4)    | 1769(41.9)    | 1237(48.7)      |        |
| Female              | 3,758(55.6)     | 2456(58.1)    | 1302(51.3)      |        |
| Age, years          |                 |               |                 |        |
| Mean (SD)           | 48.18 (0.27)    | 46.94(0.35)   | 50.25(0.43)     | <0.001 |
| Less than 20        | 950 (22.0)      | 629(22.9)     | 321(20.5)       | <0.001 |
| 20–39               | 1,215 (28.2)    | 877(31.9)     | 338(21.6)       |        |
| 40–59               | 2,045 (47.4)    | 1192(43.4)    | 853(54.4)       |        |
| More than 59        | 103 (2.4)       | 48(1.7)       | 55(3.5)         |        |
| Distance to CH (km) |                 |               |                 |        |
| Mean (SD)           | 36.29 (0.27)    | 35.99(0.34)   | 36.78(0.42)     | 0.15   |
| Time to CH (min)    |                 |               |                 |        |
| Mean (SD)           | 60.51 (0.45)    | 59.73(0.57)   | 61.79(0.72)     | 0.03   |
| Capacity of TH      |                 | 0.53          |                 | 0.53   |
| 1st level (Strong)  | 3,076 (45.5)    | 1918(45.4)    | 1158(45.6)      |        |
| 2nd level (Better)  | 1,315 (19.4)    | 802(19)       | 513(20.2)       |        |
| 3rd level (General) | 9,35 (13.8)     | 591(14)       | 344(13.5)       |        |
| 4th level (Weak)    | 1,438 (21.3)    | 914(21.6)     | 524(20.6)       |        |
| 1st LOS (day)       |                 |               |                 |        |
| Mean (SD))          | 8.38 (0.12)     | 9.23(0.16)    | 6.96(0.16)      | <0.001 |
| 1st Expense (RMB)   |                 |               |                 |        |
| Mean (SD)           | 816.21 (7.94)   | 831.35(9.95)  | 791.01(13.14)   | 0.01   |
| 2nd LOS (day)       |                 |               |                 |        |
| Mean (SD)           | 10.24 (0.13)    | 10.03(0.16)   | 10.58(0.22)     | 0.04   |
| 2nd Expense (RMB)   |                 |               |                 |        |
| Mean (SD)           | 2215.49 (45.46) | 862.99(12.77) | 4466.09(104.99) | <0.001 |
| Interval (day)      |                 |               |                 |        |
| Mean (SD)           | 11.6 (0.12)     | 14.95(0.14)   | 6.03(0.17)      | <0.001 |
| ~3                  | 2,133(31.5)     | 582(13.8)     | 1551(61.1)      | <0.001 |
| 3–7                 | 761 (11.3)      | 517(12.2)     | 244(9.6)        |        |
| 7–15                | 1,328 (19.6)    | 987(23.4)     | 341(13.4)       |        |
| 16–31               | 2,542 (37.6)    | 2139(50.6)    | 403(15.9)       |        |
| Disease category    |                 |               |                 |        |
| Cancer              | 178 (2.6)       | 109(2.6)      | 69(2.7)         | <0.001 |
| ENT disease         | 338 (5.0)       | 243(5.8)      | 95(3.7)         |        |
| Respiratory disease | 2,673 (39.5)    | 1715(40.6)    | 958(37.7)       |        |
| Circulatory disease | 450 (6.7)       | 224(5.3)      | 226(8.9)        |        |

|                            |              |            |           |
|----------------------------|--------------|------------|-----------|
| Digestive disease          | 984 (14.5)   | 469(11.1)  | 515(20.3) |
| Urinary disease            | 269 (4.0)    | 89(2.1)    | 180(7.1)  |
| Haematological disorders   | 19 (0.2)     | 2(0.1)     | 17(0.7)   |
| Bones and muscles          | 425 (6.3)    | 218(5.2)   | 207(8.2)  |
| Obstetrics and gynaecology | 1,213 (17.9) | 1037(24.5) | 176(6.9)  |

### 230 **Determinants of choice for hospital readmission after township hospitalisation**

231 The two-level logistic regression used and the patients were identified as level 1 and  
 232 town as level 2. The results are illustrated by the level 2 variance of the zero model,  
 233 which was statistically significant ( $\chi^2=61.493$ ,  $P<0.001$ ), with aggregation of  
 234 information at the town.

235 The specific results of the explanatory variables to fit two variance component models  
 236 are shown in Table 4. The major determinants of the choice for hospital readmission  
 237 after township hospitalisation were admitted year, age, arrival time to county hospital,  
 238 inpatient interval, first LOS and disease category. If other factors remain constant,  
 239 then patients were more likely to be readmitted to county hospital among aged more  
 240 than 40-year-old groups ( $OR=1.31$ ), with shorter time to county hospital, shorter LOS,  
 241 shorter interval, with urinary tract diseases ( $OR=2.67$ ) or in the closer year. The ratio  
 242 of patients with obstetrics or gynaecology diseases readmitted to county hospital is  
 243 much lower than that of patient with cancer ( $OR=0.39$ ).

244 **Table 4 Multilevel logistic regression model analysis of the choice for hospital readmission**

|                          | Parameter estimate | Standard error | $\chi^2$ | <i>P</i> | Adjusted OR |
|--------------------------|--------------------|----------------|----------|----------|-------------|
| <b>Fixed Part:</b>       |                    |                |          |          |             |
| Constant                 | -269.7             | 39.130         | 47.513   | <0.001   | —           |
| Admitted Year            | 0.135              | 0.019          | 47.825   | <0.001   | 1.14        |
| Gender(baseline: female) |                    |                |          |          | 1.00        |
| Male                     | -0.003             | 0.065          | 0.003    | 0.956    | 1.00        |

|                                     |        |       |        |        |  |       |
|-------------------------------------|--------|-------|--------|--------|--|-------|
| Age (baseline: less than 20)        |        |       |        |        |  | 1.00  |
| 20–39                               | −0.061 | 0.122 | 0.249  | 0.618  |  | 0.94  |
| 40–59                               | 0.271  | 0.104 | 6.760  | 0.009  |  | 1.31  |
| More than 59                        | 0.034  | 0.101 | 0.115  | 0.735  |  | 1.03  |
| Distance (km)                       | 0.012  | 0.004 | 10.725 | 0.052  |  | 1.01  |
| Time (min)                          | −0.021 | 0.006 | 11.841 | <0.001 |  | 0.98  |
| Capacity of TH                      | −0.016 | 0.035 | 0.197  | 0.657  |  | 0.98  |
| 1st LOS (day)                       | −0.036 | 0.005 | 53.167 | <0.001 |  | 0.96  |
| 1st Expend (RMB)                    | 0.001  | 0.001 | 1.304  | 0.254  |  | 1.00  |
| 2nd LOS (day)                       | −0.002 | 0.003 | 0.214  | 0.644  |  | 0.99  |
| Interval (day)                      | −0.110 | 0.004 | 895.43 | <0.001 |  | 0.90  |
| Disease category (Baseline: cancer) |        |       |        |        |  | 1.00  |
| ENT                                 | −0.405 | 0.261 | 2.401  | 0.121  |  | 0.67  |
| Respiratory disease                 | −0.250 | 0.217 | 1.326  | 0.250  |  | 0.78  |
| Circulatory disease                 | 0.515  | 0.240 | 4.619  | 0.032  |  | 1.67  |
| Digestive disease                   | 0.556  | 0.226 | 6.077  | 0.014  |  | 1.74  |
| Urinary disease                     | 0.981  | 0.263 | 13.938 | <0.001 |  | 2.67  |
| Haematological disorders            | 2.305  | 0.847 | 7.408  | 0.006  |  | 10.02 |
| Bones and muscles                   | 0.245  | 0.239 | 1.055  | 0.304  |  | 1.28  |
| Obstetrics and gynaecology          | −0.946 | 0.238 | 15.847 | <0.001 |  | 0.39  |
| Else                                | −0.132 | 0.264 | 0.250  | 0.617  |  | 0.88  |
| <b>Random Part:</b>                 |        |       |        |        |  |       |
| TH variance                         | 0.152  | 0.036 | 17.811 | <0.001 |  | —     |
| Patient scale parameter             | 1      | 0.00  | —      | —      |  | —     |

245 Note: Capacity of township hospital is included in the analysis by order of ranked data.

## 246 Discussion

### 247 Choice for hospital readmission and aggregation

248 Readmission is common and inescapable, and can be attributed to technology and  
 249 management problems. <sup>[18]</sup> TC readmission accounts for 1.87% of all hospitalisation  
 250 cases in Qianjiang, and one third of the readmission cases had first inpatient  
 251 admission was in a township hospital, which is indeed a popular utilisation in rural



1  
2  
3  
4 252 China. However, as mentioned TC readmission, either through doctor suggestions or  
5  
6 253 patient choice, is an inefficient utilisation, TC patients suffer from disease delays or  
7  
8 254 cost waste, easily causing patient dissatisfaction on township hospital. One point that  
9  
10  
11 255 needs to be explained here is the uncertainty as to whether TT patients has also been  
12  
13 256 readmitted to a county hospital thrice or more, which does exists in a real scenario.  
14  
15  
16 257 The two-level logistic regression showed an evident hierarchy among the inpatient  
17  
18 258 data (town–patients). Patients’ choice for hospital readmission in the town level were  
19  
20  
21 259 clustered. In other words, 6,764 readmitting patients were non-independent, and the  
22  
23 260 choices for hospital readmission in same town tend to be approximated. The incidence  
24  
25  
26 261 differed from 2.95% (Chengnan) to 6.96% (Jindong) in different towns, the 30 towns  
27  
28 262 differed in township hospital, social customs and geographic location, and different  
29  
30  
31 263 township hospitals carried out different service concepts and medical capabilities,  
32  
33 264 which affected patient’s choice for hospital readmission.

### 265 **Determinants of the choice for hospital readmission**

36  
37  
38  
39 266 Logistic regression analysis showed that neither patient gender, capacity of township  
40  
41 267 hospital nor first expenses had any significant effects on the choice for hospital  
42  
43  
44 268 readmission, which was affected by age, arrival time to county hospital, inpatient  
45  
46 269 interval, LOS in first inpatient and disease category. Although the towns that patients  
47  
48  
49 270 lived in affected their choice for hospital readmission, capacity of township hospital  
50  
51 271 had no significant effects, so the town effects could be speculatively attributed from  
52  
53 272 social customs and geographic location, same results with Calvillo King.<sup>[19]</sup> In other  
54  
55  
56 273 words, regardless of capacity of township hospital, readmission is inescapable under

1  
2  
3  
4 274 the same OR, and prevalence was produced from the doctors' assessment on treatment  
5  
6 275 ability, or disease varied not the general capacity in theory.<sup>[20]</sup>  
7  
8  
9 276 In general, patients were more likely to be readmitted to a county hospital among  
10  
11 277 groups of older age, more convenient, lower expense, shorter interval or diseases  
12  
13  
14 278 those were harder to assess, easier to vary. With the increase of age, the ratio of  
15  
16 279 choosing to be readmitted to a county hospital also increased, which may be caused  
17  
18  
19 280 by the increased attention on the cure rate among those with more advanced ages. The  
20  
21 281 OR in terms of arrival time to county hospital is 0.98, which is easy to understand that  
22  
23 282 patients pursue a convenience choice.<sup>[16-19]</sup> The most obvious influencing factors are  
24  
25  
26 283 first LOS and the interval, and we need to combine them to discuss the difference in  
27  
28 284 choice. The average first LOS of TT groups is 9.23 days, which is very close to 9.7  
29  
30  
31 285 days, the standard LOS in township hospitals in China, moreover, the average interval  
32  
33  
34 286 was 14.95 days, and the same ratios in TC groups were 6.96 and 6.03 days. The  
35  
36 287 shorter the first LOS ( $OR=0.96$ ), with shorter interval ( $OR=0.90$ ), the higher the ratio  
37  
38 288 of choosing county hospital. This disparity would be associated with the degree of  
39  
40  
41 289 emergency of disease. For types of diseases, patients with diseases related to the  
42  
43 290 urinary systems ( $OR=2.67$ ) and haematological disorders ( $OR=10.02$ ) were more  
44  
45  
46 291 likely to choose county hospital compared with those with cancer, respiratory diseases  
47  
48 292 and other disease types. This finding can be related to township doctor assessment on  
49  
50  
51 293 treatment ability. Diseases in the urinary system, cardiovascular system and  
52  
53 294 haematological disorders cannot be controlled well in township hospitals, and thus, a  
54  
55  
56 295 higher rate of inaccurate assessments, higher probability of readmission to county

1  
2  
3  
4 296 hospital. [21] Respiratory and digestive diseases, such as influenza, paediatric  
5  
6 297 bronchial pneumonia and COPD, [22] have a high incidence and recurrence rate and  
7  
8 298 can be controlled in township hospital. Meanwhile, these diseases usually have failed  
9  
10  
11 299 treatment outcomes because of poor patient compliance on medicine and  
12  
13 300 after-cure. [23] Consequently, these patients more choose township hospitals for their  
14  
15 301 readmission. Moreover, the readmissions tend to county hospitals as time draws near  
16  
17 302 ( $OR=1.14$ ), which implies an endogenous factor affects the increase of inpatients in  
18  
19 303 county hospitals in recent years.  
20  
21  
22  
23

#### 24 304 **Amendments of TC readmission**

25  
26 305 According to the results, we could identify the forms of TC readmission by the first  
27  
28 306 LOS and interval in preliminary. Intervals in TC patient admission show a 'U'-shaped  
29  
30 307 distribution; 61.1% was readmitted to a county hospital within 3 days, and a small  
31  
32 308 prevalence peak appeared in the group after more than 15 days. Correspondently, 50.1%  
33  
34 309 of the patients in TT patients were in the group more than 15 days. Thus, the shorter  
35  
36 310 the first LOS and the shorter the interval, the higher the probability of TC readmission  
37  
38 311 as suggested by doctors. Longer first LOS and longer interval are more likely to  
39  
40 312 conversely cause an inappropriate level of care of readmission. Therefore, the  
41  
42 313 combination of first LOS and interval may be an effective identification index, and we  
43  
44 314 took one week as the cut-off value as illustrated from Table 3. TC readmissions  
45  
46 315 caused by doctor incorrect assessment was approximately 70.7%, and those caused by  
47  
48 316 patients probably accounted for 29.3%. So, we can develop different interventions  
49  
50 317 based on the different types of TC readmission.  
51  
52  
53  
54  
55  
56  
57  
58  
59  
60

1  
2  
3  
4 318 Dealing with the bad influence of TC readmission become a key content of China's  
5  
6 319 new healthcare reform, which involves rebuilding the tiered healthcare delivery  
7  
8 320 system. The negative effects of TC readmission can be decreased in two steps. First,  
9  
10 321 the incidence of TC readmission was reduced, which is inescapable but abasable. [24]  
11  
12  
13 322 The key is to improve the diagnosis of township doctors and antidiastole level, for  
14  
15 323 example, by establishing a clear diagnosis protocol to common diseases for township  
16  
17 324 hospitals, or risk prediction models for hospital readmission.[25] Second, decreasing  
18  
19 325 TC patient dissatisfaction is necessary, such as approval and the use of treatments  
20  
21 326 from township hospital, county doctors deliver continued care for admitting patients.  
22  
23 327 Chinese government should explore a new mechanism to stimulate doctors to supply  
24  
25 328 continued care between township and county hospitals, such as global budget of  
26  
27 329 multi-level institutions on certain diseases. Continued care could save examinations  
28  
29 330 and decrease inpatient cost, then increase patient satisfaction. When a patient gets sick  
30  
31 331 and needs hospitalisation, he or she would be willing to choose township hospital  
32  
33 332 again.

## 333 **Conclusions**

334 Inpatients were more likely to choose county hospital for readmission year by year.  
335 Moreover, TC readmission remains a popular utilisation in rural China and easily  
336 produces inappropriate patient flows. Differences in readmission choices were  
337 associated with age, arrival time to county hospital, first LOS, interval and diseases,  
338 which are all easy to be identified. Reducing the incidence of TC readmission and  
339 decreasing patient dissatisfaction are the focused actions to restore the network

1  
2  
3  
4 340 function of three-tier healthcare delivery system in rural China.  
5

6  
7 341 However, our study has several limitations. Hospitalisation information, geographical  
8  
9 342 factor, referral status and disease were all drawn into the logistic regression model in  
10  
11 343 this study, but possible individual factors, such as economic capability, education and  
12  
13 344 preference, were deficient. Moreover, the influence on choice of hospitals may be an  
14  
15 345 accumulated process, which means the more patients experience TC, the more  
16  
17 346 significant the influence would become. However, we only studied the influence of  
18  
19 347 the first TC in a year. All these limitations may bring instability to our study and need  
20  
21 348 to be solved in further studies.  
22  
23  
24

## 25 26 349 **Competing interests**

27  
28  
29 350 The authors have declared that no competing interests exist.  
30

## 31 351 **Authors' contributions**

32  
33  
34 352 Y.Z. and L.Z. participated in conception and design, and the analyses, and wrote the  
35  
36 353 manuscript. Y-D.N. participated in data collection and performed the statistical  
37  
38 354 analysis. L.Z. helped to draft the manuscript, reviewed the manuscript and made final  
39  
40 355 changes. All authors have given their final approval of the version to be published.  
41  
42  
43

## 44 356 **Funding statement**

45  
46 357 This research is supported by the National youth Natural Science Foundation of China,  
47  
48 358 grant number (71603088).  
49

## 50 51 359 **Disclosure**

52  
53  
54 360 No past publication history, no past presentation history  
55  
56  
57

## 361 Provenance and peer review

362 Not commissioned; externally peer reviewed.

## 363 Data sharing statement

364 The anonymized dataset is available through the email of the corresponding author.

365

## 366 References:

367 [1] Barnett ML, Hsu J, McWilliams JM. Patient Characteristics and Differences in Hospital  
368 Readmission Rates. *JAMA INTERNAL MEDICINE*. 2015;**175**(11):1803-1812.

369 [2] Sheingold SH, Zuckerman R, Shartz A. Understanding Medicare Hospital Readmission Rates  
370 And Differing Penalties Between Safety-Net And Other Hospitals. *HEALTH AFFAIRS*.  
371 2016;**35**(1):124-131.

372 [3] Tsai TC, Joynt KE, Orav EJ, Gawande AA, Jha AK. Variation in Surgical-Readmission Rates and  
373 Quality of Hospital Care. *NEW ENGLAND JOURNAL OF MEDICINE*. 2013;**369**(12):1134-1142.

374 [4] Berry JG, Toomey SL, Zaslavsky AM, Jha AK, et al. Pediatric Readmission Prevalence and  
375 Variability Across Hospitals. *JAMA-JOURNAL OF THE AMERICAN MEDICAL ASSOCIATION*.  
376 2013;**309**(4):372-380.

377 [5] Zhang Y, Zhang L, Tang W, Sun X. Research on Global Budget on One Certain Disease in  
378 Multilevel Institutions: Integrated Care Orientation. *INTERNATIONAL JOURNAL OF*  
379 *INTEGRATED CARE*. 2013;**13S**.

380 [6] Tsugawa Y, Jena AB, Figueroa JF, Orav EJ, Blumenthal DM, Jha AK. Comparison of Hospital  
381 Mortality and Readmission Rates for Medicare Patients Treated by Male vs Female Physicians. *JAMA*  
382 *INTERNAL MEDICINE*. 2017;**177**(2):206-213.

383 [7] Li X, Lu JP, Hu S, Cheng KK, et al. The primary health-care system in China. *LANCET*.  
384 2017;**390**(10112):2584-2594ELSEVIER SCIENCE INC.

385 [8] van Walraven C, Dhalla IA, Bell C, Etchells E, et al. Derivation and validation of an index to  
386 predict early death or unplanned readmission after discharge from hospital to the community.  
387 *CANADIAN MEDICAL ASSOCIATION JOURNAL*. 2010;**182**(6):551-557.

388 [9] Brown PH, Theoharides C. HEALTH-SEEKING BEHAVIOR AND HOSPITAL CHOICE IN  
389 CHINA'S NEW COOPERATIVE MEDICAL SYSTEM. *HEALTH ECONOMICS*. 2009;**18**:S47-S64.

390 [10] Campbell J. Inappropriate admissions: thoughts of patients and referring doctors. *J R Soc Med*.  
391 2001;**94**(12):628-6312001-12-01].

392 [11] Zhang YT, Tang WX, Zhang Y, Liu LL, Zhang L. Effects of integrated chronic care models on  
393 hypertension outcomes and spending: a multi-town clustered randomized trial in China. *BMC PUBLIC*  
394 *HEALTH*. 2017;**17**(244)BIOMED CENTRAL LTD.

395 [12] Zhang Y, Chen Y, Zhang X, Zhang L. Current level and determinants of inappropriate admissions  
396 to township hospitals under the new rural cooperative medical system in China: a cross-sectional study.  
397 *BMC HEALTH SERVICES RESEARCH*. 2014;**14**(649).

398 [13] Zhang Yan YTZL. Exploration of the hierarchical integration of rural medical institutions.  
399 Chinese Journal of Hospital

- Administration. 2016;8(32):614-617. doi:10.3760/cma.j.issn.1000-6672.2016.08.018.
- [14] Ye T, Sun XW, Tang WX, Miao Y, Zhang YD, Zhang L. Effect of continuity of care on health-related quality of life in adult patients with hypertension: a cohort study in China. BMC HEALTH SERVICES RESEARCH. 2016;16(674)BIOMED CENTRAL LTD.
- [15] NHaFPCoC. *2017 China Statistics Yearbook of Health and Family Planning*. Beijing: China union medical university press, 2017.
- [16] Herrin J, St Andre J, Kenward K, Joshi MS, Audet AJ, Hines SC. Community Factors and Hospital Readmission Rates. HEALTH SERVICES RESEARCH. 2015;50(1):20-39.
- [17] Longford NT. Improved approximations for multilevel models with binary responses. JOURNAL OF THE ROYAL STATISTICAL SOCIETY SERIES A-STATISTICS IN SOCIETY. 1997;160(3):593.
- [18] Lim SL, Ong KCB, Chan YH, Loke WC, Ferguson M, Daniels L. Malnutrition and its impact on cost of hospitalization, length of stay, readmission and 3-year mortality. CLINICAL NUTRITION. 2012;31(3):345-350.
- [19] Calvillo-King L, Arnold D, Eubank KJ, Lo M, et al. Impact of Social Factors on Risk of Readmission or Mortality in Pneumonia and Heart Failure: Systematic Review. JOURNAL OF GENERAL INTERNAL MEDICINE. 2013;28(2):269-282.
- [20] Kogan AC, Koons E, Enguidanos S. Investigating the Impact of Intervention Refusal on Hospital Readmission. AMERICAN JOURNAL OF MANAGED CARE. 2017;23(12):E394-E401.
- [21] Ross JS, Chen J, Lin Z, Bueno H, et al. Recent National Trends in Readmission Rates After Heart Failure Hospitalization. CIRCULATION-HEART FAILURE. 2010;3(1):97-103.
- [22] Hartl S, Luis Lopez-Campos J, Pozo-Rodriguez F, Castro-Acosta A, et al. Risk of death and readmission of hospital-admitted COPD exacerbations: European COPD Audit. EUROPEAN RESPIRATORY JOURNAL. 2016;47(1):113-121.
- [23] Vo D, Zurakowski D, Faraoni D. Incidence and predictors of 30-day postoperative readmission in children. PEDIATRIC ANESTHESIA. 2018;28(1):63-70.
- [24] Lawson EH, Hall BL, Louie R, Ettner SL, et al. Association Between Occurrence of a Postoperative Complication and Readmission Implications for Quality Improvement and Cost Savings. ANNALS OF SURGERY. 2013;258(1):10-18.
- [25] Kansagara D, Englander H, Salanitro A, Kagen D, et al. Risk Prediction Models for Hospital Readmission A Systematic Review. JAMA-JOURNAL OF THE AMERICAN MEDICAL ASSOCIATION. 2011;306(15):1688-1698.

432

433

## 434 **Figure Legend**

435 **Figure 1.** Map of Qianjiang district: geographic distribution

436



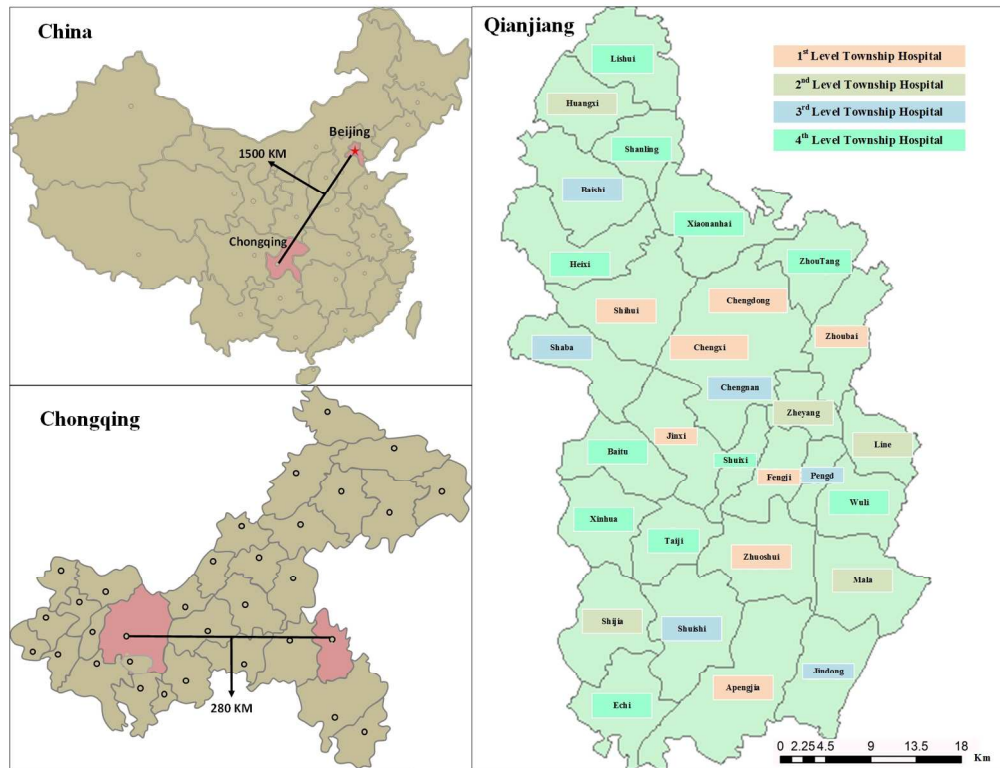

Figure 1. Map of Qianjiang district: geographic distribution

399x308mm (120 x 120 DPI)

www.bmj.com



**STROBE 2007 (v4) Statement—Checklist of items that should be included in reports of *cross-sectional studies***

| Section/Topic                | Item # | Recommendation                                                                                                                                                                       | Reported on page # |
|------------------------------|--------|--------------------------------------------------------------------------------------------------------------------------------------------------------------------------------------|--------------------|
| <b>Title and abstract</b>    | 1      | (a) Indicate the study’s design with a commonly used term in the title or the abstract                                                                                               | <b>1</b>           |
|                              |        | (b) Provide in the abstract an informative and balanced summary of what was done and what was found                                                                                  | <b>2-4</b>         |
| <b>Introduction</b>          |        |                                                                                                                                                                                      |                    |
| Background/rationale         | 2      | Explain the scientific background and rationale for the investigation being reported                                                                                                 | <b>4-7</b>         |
| Objectives                   | 3      | State specific objectives, including any prespecified hypotheses                                                                                                                     | <b>7</b>           |
| <b>Methods</b>               |        |                                                                                                                                                                                      |                    |
| Study design                 | 4      | Present key elements of study design early in the paper                                                                                                                              | <b>7</b>           |
| Setting                      | 5      | Describe the setting, locations, and relevant dates, including periods of recruitment, exposure, follow-up, and data collection                                                      | <b>7</b>           |
| Participants                 | 6      | (a) Give the eligibility criteria, and the sources and methods of selection of participants                                                                                          | <b>8</b>           |
| Variables                    | 7      | Clearly define all outcomes, exposures, predictors, potential confounders, and effect modifiers. Give diagnostic criteria, if applicable                                             | <b>9</b>           |
| Data sources/<br>measurement | 8*     | For each variable of interest, give sources of data and details of methods of assessment (measurement). Describe comparability of assessment methods if there is more than one group | <b>8</b>           |
| Bias                         | 9      | Describe any efforts to address potential sources of bias                                                                                                                            | <b>N</b>           |
| Study size                   | 10     | Explain how the study size was arrived at                                                                                                                                            | <b>9</b>           |
| Quantitative variables       | 11     | Explain how quantitative variables were handled in the analyses. If applicable, describe which groupings were chosen and why                                                         | <b>7</b>           |
| Statistical methods          | 12     | (a) Describe all statistical methods, including those used to control for confounding                                                                                                | <b>10</b>          |
|                              |        | (b) Describe any methods used to examine subgroups and interactions                                                                                                                  | <b>10</b>          |
|                              |        | (c) Explain how missing data were addressed                                                                                                                                          | <b>N</b>           |
|                              |        | (d) If applicable, describe analytical methods taking account of sampling strategy                                                                                                   | <b>N</b>           |
|                              |        | (e) Describe any sensitivity analyses                                                                                                                                                | <b>N</b>           |
| <b>Results</b>               |        |                                                                                                                                                                                      |                    |

|                          |     |                                                                                                                                                                                                              |              |
|--------------------------|-----|--------------------------------------------------------------------------------------------------------------------------------------------------------------------------------------------------------------|--------------|
| Participants             | 13* | (a) Report numbers of individuals at each stage of study—eg numbers potentially eligible, examined for eligibility, confirmed eligible, included in the study, completing follow-up, and analysed            | <b>9</b>     |
|                          |     | (b) Give reasons for non-participation at each stage                                                                                                                                                         | <b>N</b>     |
|                          |     | (c) Consider use of a flow diagram                                                                                                                                                                           | <b>N</b>     |
| Descriptive data         | 14* | (a) Give characteristics of study participants (eg demographic, clinical, social) and information on exposures and potential confounders                                                                     | <b>10</b>    |
|                          |     | (b) Indicate number of participants with missing data for each variable of interest                                                                                                                          | <b>N</b>     |
| Outcome data             | 15* | Report numbers of outcome events or summary measures                                                                                                                                                         | <b>9</b>     |
| Main results             | 16  | (a) Give unadjusted estimates and, if applicable, confounder-adjusted estimates and their precision (eg, 95% confidence interval). Make clear which confounders were adjusted for and why they were included | <b>13-15</b> |
|                          |     | (b) Report category boundaries when continuous variables were categorized                                                                                                                                    | <b>13-15</b> |
|                          |     | (c) If relevant, consider translating estimates of relative risk into absolute risk for a meaningful time period                                                                                             | <b>13-15</b> |
| Other analyses           | 17  | Report other analyses done—eg analyses of subgroups and interactions, and sensitivity analyses                                                                                                               | <b>10-13</b> |
| <b>Discussion</b>        |     |                                                                                                                                                                                                              |              |
| Key results              | 18  | Summarise key results with reference to study objectives                                                                                                                                                     | <b>13-17</b> |
| Limitations              | 19  | Discuss limitations of the study, taking into account sources of potential bias or imprecision. Discuss both direction and magnitude of any potential bias                                                   | <b>19</b>    |
| Interpretation           | 20  | Give a cautious overall interpretation of results considering objectives, limitations, multiplicity of analyses, results from similar studies, and other relevant evidence                                   | <b>17-19</b> |
| Generalisability         | 21  | Discuss the generalisability (external validity) of the study results                                                                                                                                        | <b>19</b>    |
| <b>Other information</b> |     |                                                                                                                                                                                                              |              |
| Funding                  | 22  | Give the source of funding and the role of the funders for the present study and, if applicable, for the original study on which the present article is based                                                | <b>21</b>    |

\*Give information separately for cases and controls in case-control studies and, if applicable, for exposed and unexposed groups in cohort and cross-sectional studies.

**Note:** An Explanation and Elaboration article discusses each checklist item and gives methodological background and published examples of transparent reporting. The STROBE checklist is best used in conjunction with this article (freely available on the Web sites of PLoS Medicine at <http://www.plosmedicine.org/>, Annals of Internal Medicine at <http://www.annals.org/>, and Epidemiology at <http://www.epidem.com/>). Information on the STROBE Initiative is available at [www.strobe-statement.org](http://www.strobe-statement.org).

# BMJ Open

## Determinants of Patient Choice for Hospital Readmission after Township Hospitalisation: A Population-Based Retrospective Study in China

|                                 |                                                                                                                                                                                                                                                                                |
|---------------------------------|--------------------------------------------------------------------------------------------------------------------------------------------------------------------------------------------------------------------------------------------------------------------------------|
| Journal:                        | <i>BMJ Open</i>                                                                                                                                                                                                                                                                |
| Manuscript ID                   | bmjopen-2018-021516.R1                                                                                                                                                                                                                                                         |
| Article Type:                   | Research                                                                                                                                                                                                                                                                       |
| Date Submitted by the Author:   | 04-Apr-2018                                                                                                                                                                                                                                                                    |
| Complete List of Authors:       | Zhang, Yan; Huazhong University of Science and Technology Tongji Medical College, School of Medicine and Health Management<br>Yadong, Niu; Huazhong University of Science and Technology<br>ZHANG, LIANG; Huazhong University of Science and Technology Tongji Medical College |
| <b>Primary Subject Heading</b>: | Health services research                                                                                                                                                                                                                                                       |
| Secondary Subject Heading:      | Health services research, Health policy, Medical management                                                                                                                                                                                                                    |
| Keywords:                       | readmission, choice, county hospital, patient flow, rural China                                                                                                                                                                                                                |
|                                 |                                                                                                                                                                                                                                                                                |

SCHOLARONE™  
Manuscripts

1  
2  
3  
4 **1 Determinants of Patient Choice for Hospital Readmission after Township**  
5  
6  
7 **2 Hospitalisation: A Population-Based Retrospective Study in China**  
8  
9

10  
11  
12 4 Yan Zhang<sup>1,2</sup>, Yadong Niu<sup>1,2</sup>, Liang Zhang<sup>1,2</sup> §  
13  
14  
15

16  
17 <sup>1</sup> School of Medicine and Health Management, Tongji Medical College, Huazhong  
18  
19  
20 7 University of Science and Technology, Wuhan, Hubei, 430030, China  
21

22 8 <sup>2</sup> Research Centre for Rural Health Service, Key Research Institute of Humanities & Social  
23  
24 9 Sciences of Hubei Provincial Department of Education, Wuhan, Hubei, 430030, China  
25  
26

27  
28  
29 **11 Email addresses:**  
30

31 12 Y.Z. Yan Zhang Ph.D. yanzhang@hust.edu.cn  
32

33  
34 13 Y-D. N. Yadong Niu M.D. nyadong@126.com  
35

36 14 L.Z. Liang Zhang M.D. zhangliang@mails.tjmu.edu.cn  
37  
38

39  
40  
41 **16 §Corresponding author:**  
42

43  
44 17 Liang Zhang, zhangliang@mails.tjmu.edu.cn  
45  
46

47  
48  
49 **19 Word Count: 3259**  
50  
51

52  
53  
54  
55  
56  
57  
58  
59  
60

## 21 **Abstract**

22 **Objective:** The lack of coordinated and appropriate healthcare across sectors has produced  
23 more patients for county hospitals in China. This study examined differences in patient  
24 choice between township and county hospitals for readmission after a first township  
25 hospitalisation, and the determinants that influenced this choice.

26 **Design:** A retrospective study of readmissions across hospitals after a first admission in  
27 township hospital. A township–township inpatient (TT) group and a township–county  
28 inpatient (TC) group were compared. A two-level logistic regression model was used to  
29 examine the determinants of choice for hospital readmission.

30 **Setting:** Data were drawn from a population-based health utilisation database for  
31 Qianjiang District, China, from 1 January 2008 to 31 December 2013.

32 **Participants:** This study focused on readmitted patients whose first admission was in a  
33 township hospital. Readmission cases were identified as the same diagnosis (International  
34 Classification of Diseases, tenth revision) in a subsequent hospitalisation within 30 days. In  
35 total, 6,764 readmissions had first admissions in township hospitals.

36 **Primary outcome measures:** Patient choice for hospital readmission after a first township  
37 hospitalisation

38 **Results:** The TT group accounted for 62.5% (4,225) and the TC group for 37.5% (2,539)  
39 of readmissions in 6 years. Readmission rates varied among towns ( $P < 0.001$ ). Differences  
40 between the TC and TT groups included: length of stay (LOS) of first admission (6.96 days  
41 vs. 9.23 days), average interval between admissions (6.03 days vs. 14.95 days) and disease  
42 category. Admission year, age, travel time to county hospital, interval between admissions,

1  
2  
3  
4 43 first admission LOS and disease category were determinants of choice for hospital  
5  
6 44 readmission.

7  
8 45 **Conclusions:** Patients whose first admission was in a township hospital were more likely  
9  
10 46 to be readmitted to a county hospital. A combination of first LOS and interval between  
11  
12 47 admissions may be an effective identification index for township–county readmission.

13  
14  
15 48 **Keywords:** readmission, choice, county hospital, patient flow, rural China

## 19 49 **Strengths and limitations**

- 20  
21  
22 50 • This is the first study to introduce township-county readmission, a feature of  
23  
24 51 hospitalisation in rural China.
- 25  
26 52 • Population-level data on readmission is seldom reported across hospitals of different  
27  
28 53 levels.
- 29  
30 54 • Programming techniques, including Microsoft Excel formulas and case processing  
31  
32 55 technologies, were used in the data processing.
- 33  
34 56 • A two-level logistic regression model was used to consider aggregation at the town level.
- 35  
36 57 • Hospitalisation information, geographical factors, interval status and disease were all  
37  
38 58 entered into the logistic regression model, but some individual factors were missing.

## 44 45 59 **Background**

46  
47  
48 60 Readmission refers to an episode where an inpatient is readmitted for the same disease  
49  
50 61 with 30 days.<sup>[1, 2]</sup> In most studies, readmission findings reflect that inpatient care did not  
51  
52 62 meet patient requirements, with readmission rates used as an evaluation index for  
53  
54 63 hospitalisation quality.<sup>[3]</sup> Readmission usually occurs in the same hospital, but sometimes

1  
2  
3  
4 64 occurs across hospitals because of deterioration of a patient's disease.<sup>[4]</sup> However, in rural  
5  
6 65 China, multilevel institutional readmission is a common and important healthcare  
7  
8 66 utilisation. This reflects defects of China's healthcare delivery system, rather than  
9  
10  
11 67 hospitalisation quality, especially in township–county (TC) readmissions. TC readmission  
12  
13 68 is a health-seeking behaviour in which inpatients seek healthcare services in a township  
14  
15 69 hospital first, and then in a county hospital, whether planned or unplanned, voluntarily or  
16  
17 70 passively. TC readmission is frequent in rural China, and currently accounts for  
18  
19  
20 71 approximately 2.0% of all inpatient services.<sup>[5]</sup> TC readmission usually occurs following  
21  
22 72 doctor recommendation/referral or by individual patient choice.  
23  
24  
25 73 TC readmission recommended by doctors occurs when a township doctor has an inpatient  
26  
27 74 admission that they cannot fully treat or completely cure,<sup>[6]</sup> consequently, that patient is  
28  
29 75 referred directly to a county hospital or advised to go to a county hospital for subsequent  
30  
31 76 admission.<sup>[6]</sup> This situation results from the three-tier healthcare delivery system in rural  
32  
33 77 China, where care is provided in a village–town–county healthcare delivery system, and all  
34  
35 78 hospital services are supplied by township and county hospitals.<sup>[7]</sup> In general, the higher  
36  
37 79 the level of the institution, the stronger the service capability, the greater the distance a  
38  
39 80 patient must travel and the higher the medical cost. Township hospitals bear the  
40  
41 81 responsibilities of transferring patients, taking care of inpatients with general illnesses and  
42  
43 82 advising patients with severe diseases (that are beyond their capacity) to seek admission at  
44  
45 83 county hospitals.<sup>[8]</sup> Township hospital doctors sometimes receive patients whose diseases  
46  
47 84 are beyond their capacity to manage (e.g. because of their inaccurate judgment, or  
48  
49 85 deterioration of the disease), meaning TC readmission may be unavoidable.  
50  
51  
52  
53  
54  
55  
56  
57  
58  
59  
60

1  
2  
3  
4 86 TC readmission from individual choice occurs when patients who should be readmitted to  
5  
6 87 township hospitals choose to be admitted to county hospitals for personal reasons.<sup>[9]</sup> Some  
7  
8 88 readmissions are influenced by quality concerns with township hospitals, poor patient  
9  
10 89 compliance on medicine and after-care or from a normal disease recurrence. However,  
11  
12 90 patients often do not acknowledge the real readmission reason and transfer responsibility  
13  
14 91 for readmission to the township hospital doctor (e.g. considering readmission as a result of  
15  
16 92 failed treatment) and consequently decide to be readmitted to a county hospital. This  
17  
18 93 situation often represents inappropriate readmission.<sup>[10]</sup>  
19  
20  
21  
22  
23 94 From the patients' perspective, no order or limitation on patient choice exists. In addition,  
24  
25 95 no general practitioners or consultants are available in rural China. Therefore, residents  
26  
27 96 freely choose hospitals and service types, mainly depending on their judgment regarding  
28  
29 97 their disease and understanding of hospitals. If a patient chooses a higher-level institution  
30  
31 98 than necessary, they pay more; if they choose a lower-level institution than necessary they  
32  
33 99 would be referred or readmitted. Therefore, the cost of an incorrect decision is borne by the  
34  
35 100 patient. To guarantee patient interests regarding TC readmission, the three-tier healthcare  
36  
37 101 delivery system requires different-level hospitals to cooperate in providing continuous  
38  
39 102 healthcare services. However, in reality, communication among township and county  
40  
41 103 professional providers are limited, and there is virtually no document sharing and  
42  
43 104 interactions among providers across the three tiers.<sup>[11]</sup> County hospital doctors do not  
44  
45 105 deliver continued care for readmitted patients because of income incentives and risk  
46  
47 106 aversion, and patients readmitted to a county hospital usually receive new treatment.<sup>[12]</sup>  
48  
49  
50  
51  
52  
53  
54  
55 107 Furthermore, compared with patients admitted directly to county hospitals, readmitted



1  
2  
3  
4 108 patients spend more time, pay more costs and may even miss proper treatments. As a result,  
5  
6 109 when subsequent illnesses occur and patients are unable to judge the severity of their  
7  
8 110 illness, they tend to choose admission in a county hospital, taking excess economic risk to  
9  
10 111 avoid delay. Some studies have defined TC readmission as failed treatment from the  
11  
12 112 patients' perspective, and shown that the TC readmission experience can influence a  
13  
14 113 patient's later choice of hospital.<sup>[13, 14]</sup> Inpatients may be more likely to seek care in  
15  
16 114 county hospitals compared with township hospitals; a phenomenon that is already  
17  
18 115 happening. The annual growth rate of inpatients in county hospitals from 2010 to 2016 was  
19  
20 116 6.75%, whereas that of township hospital inpatients was 0.63%.<sup>[15]</sup>  
21  
22  
23 117 As noted, TC readmission from individual choice belongs to the inappropriate level  
24  
25 118 admission, and TC readmission recommended by doctors can also result in inappropriate  
26  
27 119 level admission for subsequent hospitalisation. Inappropriate level admission means  
28  
29 120 patients seek healthcare in a higher-level hospital than necessary. This may result from  
30  
31 121 patients' intentional institution selection and distrust of the capability of township hospitals;  
32  
33 122 such patients prefer to spend more money on healthcare to avoid the risk of needing  
34  
35 123 referral. Inappropriate level admission is a major form of excess service demand,<sup>[12]</sup> and  
36  
37 124 an important determinant of increasing health expenditure that leads to significant waste.  
38  
39 125 In this context, identifying the forms and determinants of TC readmission will help to  
40  
41 126 improve the New Rural Cooperative Medical System (NRCMS). This study focused on  
42  
43 127 choices for hospital readmission after a first admission as an inpatient in a township  
44  
45 128 hospital, and identified the determinants of choice for hospital readmission.  
46  
47  
48  
49  
50  
51  
52  
53  
54  
55  
56  
57  
58  
59  
60

## 129 **Methods**

### 130 **Study setting**

131 Qianjiang District was designated as the sample area through cluster sampling. This is a  
132 typical rural area located in Chongqing, which is the largest municipality in southwest  
133 China. Qianjiang has a per capita GDP of \$7,515 in 2016, which is below the average GDP  
134 in China. The resident population is 550,000 people; all residents are covered under the  
135 NRCMS, and are eligible to receive reimbursement for inpatient care. Qianjiang District  
136 has two county hospitals and 30 township hospitals. The township hospitals are divided  
137 into four levels according to their scale and service quantity by Qianjiang Health Bureau  
138 (Fig. 1). First-level township hospitals are allocated more than 30 beds and may perform  
139 abdomen operations; these hospitals had more than 1,200 discharged patients in 2013.  
140 Second-level township hospitals cannot perform abdomen operations of the same scale.  
141 Third-level township hospitals have fewer than 30 beds and around 600~1,200 discharged  
142 patients. All other township hospitals belong to the fourth level.

### 143 **Data source**

144 This study was based on the NRCMS inpatient database in Qianjiang District, which  
145 contains all inpatient data for the population. In this database, a case refers to a single  
146 hospitalisation in a county or township hospital.

### 147 **Data processing**

148 We focused on individuals who had been discharged from participating hospitals.

1  
2  
3  
4 149 Readmission cases were identified as the same diagnosis in subsequent hospitalisations  
5  
6 150 between county and township hospitals or township hospitals and township hospitals  
7  
8 151 within 30 days. Given our population-based retrospective design, we compared the  
9  
10 152 differences between township–township readmitted inpatients (TT group) and TC  
11  
12 153 readmitted inpatients (TC group). Samples were entered into MS Excel 2010, based on the  
13  
14 154 NRCMS database from 1 January 2008 to 31 December 2013. First, cases that shared the  
15  
16 155 same patient identifier and the same disease codes were sorted in chronological order.  
17  
18  
19  
20 156 Second, we calculated the interval between admissions in two adjacent cases for the same  
21  
22 157 inpatient for the same disease; if the interval between admissions was less than 31 days, the  
23  
24 158 patient was marked as a readmission patient. For example, if the first admission occurred  
25  
26 159 in a township hospital and the second occurred in county hospital, the two cases would be  
27  
28 160 merged as one case and marked as a TC readmission, and the patient marked as TC patient.  
29  
30  
31  
32 161 TT patients were identified in a similar manner. Finally, all TC and TT cases were  
33  
34 162 extracted into a new database. As diagnosis of a disease may change among different  
35  
36 163 doctors, in different institutions or at different times, we adjusted the original International  
37  
38 164 Classification of Diseases, tenth revision disease code into a broader code (e.g. chronic  
39  
40 165 obstructive pulmonary disease was adjusted from J44.900 to J44), which may improve  
41  
42 166 accuracy in identifying readmitted patients. After screening, there were 6,764 readmitted  
43  
44 167 patients from 2008–2013 in the sample. The main programming techniques included  
45  
46 168 Microsoft Excel formulas (e.g. COUNTIF, SUMPRODUCT, LOOKUP and IF) and case  
47  
48 169 processing technologies (e.g. split columns and removal of duplicates).  
49  
50  
51  
52 170 Sociological characteristics were collected to build a final database, including: gender; age;

1  
2  
3  
4 171 travel time to county hospital; first inpatient information including length of stay (LOS),  
5  
6 172 expenses, disease category, capacity of the township hospital, interval between admissions  
7  
8 173 and readmitted hospital choice.<sup>[16]</sup> The distance and travel time to the county hospital for  
9  
10 174 all readmitted patients were captured individually by Google Maps. Because traffic  
11  
12 175 conditions are different in different towns (e.g. national roads, provincial roads or county  
13  
14 176 roads), both the distance and travel time were captured.

### 177 **Statistical analysis**

178 The characteristics of patients' choices for hospital readmission were compared using  
179 t-tests and chi-square tests in IBM SPSS Statistics 22.0. The treatment capacity of  
180 township hospitals and the travel time to a county hospital from different towns have  
181 differential impacts on the observed predictors. Therefore, we assumed that the obtained  
182 data indicated a hierarchical structure, and the 6,764 records could be aggregated by town  
183 level. The determinants of choice for hospital readmission were examined using multilevel  
184 binomial logistic regression analysis using MLwiN 2.30, which was developed by the  
185 University of Bristol, UK.<sup>[17]</sup> Patients were identified as level 1 and town as level 2. The  
186 regression model was as follows.

$$187 \quad \log \text{it}(\pi_{ij}) = \beta_0 \text{cons} + \beta_1 \text{Admitted Year}_{ij} + \beta_2 \text{Gender}_{ij} + \beta_3 \text{Age}_{ij} + \beta_4 \text{Distance}_{ij} + \beta_5 \text{Time}_{ij} \\ + \beta_6 \text{Capacity}_{ij} + \beta_7 \text{1st LOS}_{ij} + \beta_8 \text{1st Expends}_{ij} + \beta_9 \text{Interval}_{ij} + \text{More14}_{ij}$$

$$188 \quad \beta_{0j} = \beta_0 + u_{0j}$$

189  $\beta_i$  refers to the fixed effects parameter, and  $u_{0j}$  refers to the random effects of level 2.

### 190 **Patient and Public Involvement**

191 No patients or public were involved in this research.

## 192 Ethical approval

193 The study protocol conformed to the guidelines of the Ethics Committee of the Tongji  
 194 Medical College of Huazhong University of Science and Technology. The protocol was  
 195 registered in the Chinese Clinical Trial Registry (ChiCTR-OOR-14005563). Patient  
 196 information was anonymised and de-identified before analysis.

## 197 Results

### 198 Choices for hospital readmission after a first township hospitalisation

199 Among 271,405 discharged admissions in 2008–2013, there were 6,764 readmissions after  
 200 a first hospitalisation in a township hospital. The TT group accounted for 62.5% (4,225) of  
 201 all readmissions and the TC group for 37.5% (2,539) (Table 1). The number of  
 202 readmissions increased sharply, whereas the proportion of readmissions in the total  
 203 inpatients only changed slightly (5.0%). The TC group increased from 1.66% in 2008 to  
 204 1.89% in 2013, with the annual growth rate of the TC group being 28.55%, which was  
 205 higher than that of the TT group (22.38%).

206 **Table 1. Number of readmissions each year in Qianjiang district (2008–2013)**

| Year         | All inpatients | Readmissions* n (%) | Choice for hospital readmission** |                | P***   |
|--------------|----------------|---------------------|-----------------------------------|----------------|--------|
|              |                |                     | TT group n (%)                    | TC group n (%) |        |
| 2008         | 21,823         | 524 (4.80)          | 342 (3.14)                        | 182 (1.66)     | <0.001 |
| 2009         | 34,240         | 1,076 (6.27)        | 724 (4.23)                        | 352 (2.04)     |        |
| 2010         | 35,866         | 942 (5.25)          | 608 (3.39)                        | 334 (1.86)     |        |
| 2011         | 50,616         | 1,260 (4.98)        | 797 (3.16)                        | 463 (1.82)     |        |
| 2012         | 61,467         | 1,384 (4.50)        | 815 (2.64)                        | 569 (1.86)     |        |
| 2013         | 67,392         | 1,578 (4.67)        | 939 (2.78)                        | 639 (1.89)     |        |
| <b>Total</b> | 271,405        | 6,764 (4.98)        | 4,225 (3.11)                      | 2,539 (1.87)   |        |

207 \* Readmission refers to readmissions whose first admission was in a township hospital.

208 \*\* One readmission includes two admissions.

209 \*\*\* Pearson's chi-square test.

210 Readmission varied among towns (Table 2). Chengnan town had the lowest overall  
 211 readmission ratio (2.95%) and the lowest TT readmission ratio (1.52%) of the 30 towns.  
 212 Heixi town had the lowest TC readmission ratio (1.30%), Shijia town had the highest TC  
 213 readmission ratio (2.86%) and Jindong town had the highest TT readmission (5.49%) and  
 214 overall readmission (6.96%) ratios.

215 **Table 2. Number of readmissions Qianjiang district (2008–2013), by town**

| Town         | All inpatients | Readmissions* n (%) | Choice for hospital readmission** |                    | P***   |
|--------------|----------------|---------------------|-----------------------------------|--------------------|--------|
|              |                |                     | TT group n (%)                    | TC group n (%)     |        |
| Chengnan     | 11,716         | 173 (2.95)          | 89 (1.52)                         | 84 (1.43)          |        |
| Heixi        | 9,073          | 137 (3.02)          | 78 (1.72)                         | 53 (1.30)          |        |
| Shaba        | 8,778          | 152 (3.20)          | 81 (1.58)                         | 71 (1.62)          |        |
| ~            | ~              | ~                   | ~                                 | ~                  | <0.001 |
| Shijia       | 8,605          | 223 (5.18)          | 100 (2.32)                        | 123 (2.86)         |        |
| ~            | ~              | ~                   | ~                                 | ~                  |        |
| Jindong      | 6,007          | 209 (6.96)          | 165 (5.49)                        | 44 (1.47)          |        |
| <b>Total</b> | <b>271,405</b> | <b>6,764 (4.98)</b> | <b>4225 (3.11)</b>                | <b>2539 (1.87)</b> |        |

216 \* Readmission refers to readmissions whose first admission was in a township hospital.

217 \*\* One readmission includes two admissions.

218 \*\*\* Pearson's chi-square test.

### 219 **Characteristics of readmitted patients between TT and TC groups**

220 Table 3 shows the characteristics of readmitted patients from 2008–2013. Male patients  
 221 accounted for 48.7% of the TC group, which was a higher rate than in the TT group (41.9%,  
 222  $P < 0.001$ ). Readmission choices varied in different age groups ( $P < 0.001$ ), with over half  
 223 (57.9%) of patients in the TC group aged 40–59 years. The most common interval between  
 224 admissions in the TC group was shorter than 3 days (61.1%), whereas that in the TT group  
 225 was 16–30 days (50.6%,  $P < 0.001$ ). The average interval between admissions in the TC  
 226 group was lower than that in TT group (6.03 days vs. 14.95 days). Similar patterns were  
 227 observed in the average LOS of first inpatient admissions (6.96 days vs. 9.23 days) and

228 travel time to county hospital (59.73 minutes vs. 61.79 minutes). However, an opposite  
 229 trend was observed in terms of expenses of first inpatient admission (¥831.35 vs. ¥791.01).  
 230 The TC group mostly had respiratory (37.7%) and digestive diseases (20.3%). There were  
 231 no significant differences in the distance to a county hospital and the township hospital  
 232 capacity between the TT and TC groups.

233 **Table 3. Distribution of characteristics of readmitted patients (n = 6,764)**

| Variable            | All n (%)       | Choice for hospital readmission |                 | P        |
|---------------------|-----------------|---------------------------------|-----------------|----------|
|                     |                 | TT group n (%)                  | TC group n (%)  |          |
| All                 | 6,764           | 4,225 (62.5)                    | 2539(37.5)      |          |
| Gender              |                 |                                 |                 | <0.001*  |
| Male                | 3,006 (44.4)    | 1769(41.9)                      | 1237(48.7)      |          |
| Female              | 3,758(55.6)     | 2456(58.1)                      | 1302(51.3)      |          |
| Age, years          |                 |                                 |                 |          |
| Mean (SD)           | 48.18 (0.27)    | 46.94(0.35)                     | 50.25(0.43)     | <0.001** |
| Less than 20        | 950 (22.0)      | 629(22.9)                       | 321(20.5)       | <0.001*  |
| 20–39               | 1,215 (28.2)    | 877(31.9)                       | 338(21.6)       |          |
| 40–59               | 2,045 (47.4)    | 1192(43.4)                      | 853(54.4)       |          |
| More than 59        | 103 (2.4)       | 48(1.7)                         | 55(3.5)         |          |
| Distance to CH (km) |                 |                                 |                 |          |
| Mean (SD)           | 36.29 (0.27)    | 35.99(0.34)                     | 36.78(0.42)     | 0.15**   |
| Time to CH (min)    |                 |                                 |                 |          |
| Mean (SD)           | 60.51 (0.45)    | 59.73(0.57)                     | 61.79(0.72)     | 0.03**   |
| Capacity of TH      |                 |                                 |                 | 0.53*    |
| 1st level (Strong)  | 3,076 (45.5)    | 1918(45.4)                      | 1158(45.6)      |          |
| 2nd level (Better)  | 1,315 (19.4)    | 802(19)                         | 513(20.2)       |          |
| 3rd level (General) | 9,35 (13.8)     | 591(14)                         | 344(13.5)       |          |
| 4th level (Weak)    | 1,438 (21.3)    | 914(21.6)                       | 524(20.6)       |          |
| 1st LOS (day)       |                 |                                 |                 |          |
| Mean (SD))          | 8.38 (0.12)     | 9.23(0.16)                      | 6.96(0.16)      | <0.001** |
| 1st Expense (RMB)   |                 |                                 |                 |          |
| Mean (SD)           | 816.21 (7.94)   | 831.35(9.95)                    | 791.01(13.14)   | 0.01**   |
| 2nd LOS (day)       |                 |                                 |                 |          |
| Mean (SD)           | 10.24 (0.13)    | 10.03(0.16)                     | 10.58(0.22)     | 0.04**   |
| 2nd Expense (RMB)   |                 |                                 |                 |          |
| Mean (SD)           | 2215.49 (45.46) | 862.99(12.77)                   | 4466.09(104.99) | <0.001** |

| Interval between admissions (day) |              |             |            |          |
|-----------------------------------|--------------|-------------|------------|----------|
| Mean (SD)                         | 11.6 (0.12)  | 14.95(0.14) | 6.03(0.17) | <0.001** |
| ~3                                | 2,133(31.5)  | 582(13.8)   | 1551(61.1) | <0.001*  |
| 3–7                               | 761 (11.3)   | 517(12.2)   | 244(9.6)   |          |
| 7–15                              | 1,328 (19.6) | 987(23.4)   | 341(13.4)  |          |
| 16–31                             | 2,542 (37.6) | 2139(50.6)  | 403(15.9)  |          |
| Disease category                  |              |             |            | <0.001*  |
| Cancer                            | 178 (2.6)    | 109(2.6)    | 69(2.7)    |          |
| ENT disease                       | 338 (5.0)    | 243(5.8)    | 95(3.7)    |          |
| Respiratory disease               | 2,673 (39.5) | 1715(40.6)  | 958(37.7)  |          |
| Circulatory disease               | 450 (6.7)    | 224(5.3)    | 226(8.9)   |          |
| Digestive disease                 | 984 (14.5)   | 469(11.1)   | 515(20.3)  |          |
| Urinary disease                   | 269 (4.0)    | 89(2.1)     | 180(7.1)   |          |
| Haematological disorders          | 19 (0.2)     | 2(0.1)      | 17(0.7)    |          |
| Bones and muscles                 | 425 (6.3)    | 218(5.2)    | 207(8.2)   |          |
| Obstetrics and gynaecology        | 1,213 (17.9) | 1037(24.5)  | 176(6.9)   |          |

234 \* Pearson's chi-square test.

235 \*\* ANOVA.

### 236 **Determinants of choice for hospital readmission after township hospitalisation**

237 The two-level logistic regression is illustrated by the level 2 variance of the zero model.

238 This was statistically significant ( $\chi^2 = 63.524$ ,  $P < 0.001$ ), with aggregation of information

239 at the town level. The specific results of the explanatory variables to fit the two variance

240 component model are shown in Table 4. The major determinants of the choice for hospital

241 readmission after a first township hospitalisation were admission year, age, travel time to a

242 county hospital, interval between admissions, first LOS and disease category. If other

243 factors remained constant, patients in the group aged 40–59 years were more likely to be

244 readmitted to a county hospital (odds ratio [ $OR$ ] = 1.32). Other factors associated with TC

245 readmission were a shorter travel time to county hospital, shorter LOS, shorter interval

246 between admissions, urinary tract diseases ( $OR = 2.68$ ) or first admission/readmission in a



247 more recent year. The ratio of patients with obstetric or gynaecological diseases readmitted  
 248 to a county hospital was much lower than that of patients with cancer ( $OR = 0.40$ ).

249 **Table 4. Multilevel logistic regression model for hospital readmission choice**

|                                      | Parameter estimate | Standard error | $\chi^2$ | <i>P</i> | Adjusted OR |
|--------------------------------------|--------------------|----------------|----------|----------|-------------|
| <b>Fixed Part:</b>                   |                    |                |          |          |             |
| Constant                             | -271.3             | 41.231         | 49.524   | <0.001   |             |
| Admitted year*                       | 0.136              | 0.027          | 47.934   | <0.001   | 1.14        |
| Gender(reference: female)            |                    |                |          |          |             |
| Male                                 | -0.003             | 0.066          | 0.003    | 0.955    | 1.00        |
| Age (reference: less than 20)        |                    |                |          |          |             |
| 20–39                                | -0.062             | 0.123          | 0.250    | 0.617    | 0.94        |
| 40–59                                | 0.294              | 0.111          | 6.870    | 0.008    | 1.32        |
| More than 59                         | 0.034              | 0.102          | 0.116    | 0.735    | 1.03        |
| Travel time (min)                    | -0.023             | 0.013          | 17.468   | <0.001   | 0.97        |
| Capacity of TH**                     | -0.017             | 0.035          | 0.204    | 0.658    | 0.98        |
| 1st LOS (day)                        | -0.036             | 0.006          | 53.177   | <0.001   | 0.96        |
| 1st Expends (RMB)                    | 0.001              | 0.001          | 1.323    | 0.255    | 1.00        |
| 2nd LOS (day)                        | -0.002             | 0.003          | 0.213    | 0.644    | 0.99        |
| Interval between admissions (day)    | -0.110             | 0.004          | 895.49   | <0.001   | 0.90        |
| Disease category (reference: cancer) |                    |                |          |          |             |
| ENT                                  | -0.406             | 0.263          | 2.462    | 0.131    | 0.67        |
| Respiratory disease                  | -0.256             | 0.217          | 1.327    | 0.251    | 0.78        |
| Circulatory disease                  | 0.512              | 0.256          | 4.627    | 0.028    | 1.64        |
| Digestive disease                    | 0.553              | 0.227          | 6.217    | 0.013    | 1.74        |
| Urinary disease                      | 0.982              | 0.264          | 13.950   | <0.001   | 2.68        |
| Haematological disorders             | 2.310              | 0.853          | 7.641    | 0.004    | 10.03       |
| Bones and muscles                    | 0.245              | 0.242          | 1.066    | 0.301    | 1.28        |
| Obstetrics and gynaecology           | -0.947             | 0.238          | 15.874   | <0.001   | 0.40        |
| Else                                 | -0.132             | 0.265          | 0.251    | 0.617    | 0.88        |
| <b>Random Part:</b>                  |                    |                |          |          |             |
| Town variance                        | 0.153              | 0.036          | 17.921   | <0.001   | —           |
| Patient scale parameter              | 1                  | 0.00           | —        | —        | —           |

250 \* TC shows a stable increase in recent years, so admitted year was included in the analysis by order of ranked data.

251 \*\* Capacity of township hospital included in the analysis by order of ranked data.

## 252 Discussion

### 253 Choice for hospital readmission and aggregation

254 Readmission is common and unavoidable, and can often be attributed to technology and  
255 management problems.<sup>[18]</sup> TC readmission accounted for 1.89% of all hospitalisation  
256 cases in Qianjiang in 2013, showing steady growth from 2008 (1.67%). TC Readmission  
257 accounts for one-third of readmission cases had a first inpatient admission in a township  
258 hospital, which is common in rural China. However, as mentioned, TC readmission (either  
259 through doctor referral/recommendation or the patient's choice) often reflects an inefficient  
260 use of health services for patients; TC readmission patients may experience disease delays  
261 or cost waste, which may result in patient dissatisfaction regarding the township hospital.  
262 A point that needs to be noted here is the uncertainty about whether TT patients had been  
263 readmitted to a county hospital three or more times, which has been reported as a real  
264 scenario.

265 The two-level logistic regression analysis showed a hierarchy in the inpatient data (town-  
266 patients). Patients' choice of hospital readmission at the town level was clustered. In other  
267 words, 6,764 readmitted patients were non-independent, and the choices for hospital  
268 readmission in same town tended to be approximated. The incidence differed in different  
269 towns, from 2.95% (Chengnan) to 6.96% (Jindong). The 30 towns in the study area also  
270 differed in terms of township hospital, social customs and geographic location. Different  
271 township hospitals also have different service concepts and medical capabilities, which  
272 might have affected patients' hospital readmission choice.

### 273 **Determinants of choice for hospital readmission**

274 Logistic regression analysis showed that patient gender, capacity of township hospital and  
275 first admission expenses did not have significant effects on the choice of hospital for  
276 readmission. Readmission choice was affected by age, travel time to a county hospital,  
277 interval between admissions, LOS in the first admission and disease category. Although the  
278 towns in which patients lived affected their choice of hospital for readmission, the capacity  
279 of township hospitals had no significant effects; therefore, the town-based effects could be  
280 speculatively attributed to social customs and geographic location, which is consistent with  
281 a previous study.<sup>[19]</sup> In other words, regardless of capacity of the township hospital,  
282 readmission is unavoidable and prevalence under the same rate; in theory, TC readmission  
283 resulted from the doctors' assessment of their treatment ability, or deterioration of disease  
284 rather than the general hospital capacity.<sup>[20]</sup>

285 In general, patients were more likely to be readmitted to a county hospital if they were in  
286 an older age group, found travel to a county hospital more convenient, had lower expenses,  
287 had a shorter interval between admissions or diseases that were harder to assess. The ratio  
288 of patients choosing to be readmitted to a county hospital increased with age, which may  
289 be a result of the increased attention to the cure rate among those of more advanced age.

290 The OR for travel time to a county hospital was 0.97, indicating that patients made their  
291 choice based on convenience.<sup>[16, 19]</sup> The most obvious influencing factors were first LOS  
292 and the interval between admissions. These factors need to be combined to discuss the  
293 difference in choice. The average first LOS in the TT group was 9.23 days, which is close  
294 to 9.7 days, the standard LOS in township hospitals in China.<sup>[15]</sup> Moreover, the average

1  
2  
3  
4 295 interval between admissions was 14.95 days. In the TC group, the average first LOS was  
5  
6 296 6.96 days and the interval between admissions was 6.03 days. A shorter the first LOS (*OR*  
7  
8 297 = 0.96) and a shorter the interval between admissions (*OR* = 0.90) was associated with a  
9  
10 298 greater likelihood of choosing a county hospital. This disparity may be associated with the  
11  
12  
13 299 degree of urgency of the disease. Patients with diseases related to the urinary system (*OR* =  
14  
15 300 2.68) and haematological disorders (*OR* = 10.03) were more likely to choose a county  
16  
17 301 hospital compared with patients with cancer, respiratory diseases and other disease types.  
18  
19  
20 302 This finding may be related to township doctor assessment regarding treatment ability.  
21  
22  
23 303 Diseases in the urinary system, cardiovascular system and haematological disorders cannot  
24  
25 304 be controlled well in township hospitals, leading to a higher rate of inaccurate assessments  
26  
27 305 and a higher probability of readmission to a county hospital.<sup>[21]</sup> Respiratory and digestive  
28  
29 306 diseases (e.g. influenza, paediatric bronchial pneumonia and chronic obstructive  
30  
31 307 pulmonary disease<sup>[22]</sup>) have a high incidence and recurrence rate and can be controlled in  
32  
33 308 township hospitals. However, these diseases usually have failed treatment outcomes  
34  
35 309 because of poor patient compliance on medicine and after-care.<sup>[23]</sup> Consequently, these  
36  
37 310 patients may be more likely to choose township hospitals for readmission. Moreover,  
38  
39 311 readmissions tended to move toward county hospitals as urgency increased (*OR* = 1.14),  
40  
41 312 which implies an endogenous factor as affected the increase of inpatients in county  
42  
43 313 hospitals in recent years.  
44  
45  
46  
47  
48  
49  
50

#### 51 314 **Identifying forms of TC readmission**

52  
53 315 We could differentiate TC admission from TT admission by first LOS and interval between  
54  
55 316 admissions. Intervals in TC patient admission showed a U-shaped distribution; 61.1% were

1  
2  
3  
4 317 readmitted to a county hospital within 3 days, and a small prevalence peak appeared in the  
5  
6 318 group after more than 15 days. Correspondently, 50.1% of patients in the TT group had an  
7  
8 319 interval between admissions of more than 15 days. Therefore, a considerable proportion of  
9  
10 320 early readmissions might be referrals; patients readmitted after a short first LOS with a  
11  
12 321 short interval may be assumed to have been referred by doctors. A long first LOS and long  
13  
14 322 interval were more likely to indicate a TC caused by individual choice, means an  
15  
16 323 inappropriate TC readmission. Longer first LOS means a complete treatment in township  
17  
18 324 hospital, and longer interval indicates readmission maybe been caused by poor compliance  
19  
20 325 on medicine and after-cure from patients themselves or a normal disease  
21  
22 326 recurrence. Therefore, a combination of first LOS and interval may be an effective  
23  
24 327 identification index; we used 1 week as the cut-off value (Table 3). TC readmissions based  
25  
26 328 on a doctor's incorrect assessment accounted for approximately 70.7% of admissions  
27  
28 329 (interval between admissions <7 days), and those caused by patients accounted for 29.3%  
29  
30 330 (interval between admissions >7 days).

31  
32  
33  
34  
35  
36  
37  
38 331 The sample county is a typical rural area, and this research is a population based study, so  
39  
40 332 the results could present the TC phenomenon in all rural China, and data process technical  
41  
42 333 can also be used to different counties.

## 334 **Conclusions**

335 Patients were more likely to choose a county hospital for readmission in each study year.  
336 TC readmission remains a common health service use in rural China, and may result in  
337 inappropriate patient flows. Differences in readmission choices were associated with age,

1  
2  
3  
4 338 travel time to county hospital, first LOS, interval between admissions and diseases; all of  
5  
6 339 these factors are easy to identify. Combination of first LOS and interval between  
7  
8 340 admissions could be an effective identification index for the forms of TC readmission.  
9  
10

## 11 341 **Limitations**

12  
13  
14 342 Our study has several limitations. Hospitalisation information, geographical factors,  
15  
16  
17 343 interval status and disease were all entered into the logistic regression model. However,  
18  
19  
20 344 some individual factors (e.g. economic status, education and preference) were not available.  
21  
22 345 Moreover, influence on choice of hospitals may reflect an accumulated process, meaning  
23  
24 346 that the more patients experience TC readmission, the more significant the influence would  
25  
26  
27 347 become. However, we only studied the influence of the first TC readmission in a single  
28  
29  
30 348 year. These limitations may bring instability to our study and need to be resolved in future  
31  
32 349 studies.  
33

## 34 350 **Competing interests**

35  
36  
37 351 The authors have declared that no competing interests exist.  
38

## 39 352 **Authors' contributions**

40  
41  
42 353 Y.Z. and L.Z. participated in conception and design, and the analyses, and wrote the  
43  
44  
45 354 manuscript. Y-D.N. participated in data collection and performed the statistical analysis.  
46  
47 355 L.Z. helped to draft the manuscript, reviewed the manuscript and made final changes. All  
48  
49  
50 356 authors have given their final approval of the version to be published.  
51

## 52 357 **Acknowledgements**

53  
54  
55 358 This research is supported by the National youth Natural Science Foundation of China,  
56  
57

1  
2  
3  
4 359 grant number (71603088).

5  
6 360 **Disclosure**

7  
8  
9 361 No past publication history, no past presentation history

10  
11 362 **Provenance and peer review**

12  
13  
14 363 Not commissioned; externally peer reviewed.

15  
16 364 **Data sharing statement**

17  
18  
19 365 The anonymized dataset is available through the email of the corresponding author.

20  
21 366

22  
23 367 **References:**

24 368 [1] Barnett ML, Hsu J, McWilliams JM. Patient Characteristics and Differences in Hospital Readmission  
25 369 Rates. JAMA INTERNAL MEDICINE. 2015;**175**(11):1803-1812.

26  
27 370 [2] Sheingold SH, Zuckerman R, Shartz A. Understanding Medicare Hospital Readmission Rates And  
28 371 Differing Penalties Between Safety-Net And Other Hospitals. HEALTH AFFAIRS. 2016;**35**(1):124-131.

29 372 [3] Tsai TC, Joynt KE, Orav EJ, Gawande AA, Jha AK. Variation in Surgical-Readmission Rates and  
30 373 Quality of Hospital Care. NEW ENGLAND JOURNAL OF MEDICINE. 2013;**369**(12):1134-1142.

31 374 [4] Berry JG, Toomey SL, Zaslavsky AM, Jha AK, et al. Pediatric Readmission Prevalence and Variability  
32 375 Across Hospitals. JAMA-JOURNAL OF THE AMERICAN MEDICAL ASSOCIATION.  
33 376 2013;**309**(4):372-380.

34  
35 377 [5] Zhang Y, Zhang L, Tang W, Sun X. Research on Global Budget on One Certain Disease in Multilevel  
36 378 Institutions: Integrated Care Orientation. INTERNATIONAL JOURNAL OF INTEGRATED CARE.  
37 379 2013;**13S**.

38  
39 380 [6] Tsugawa Y, Jena AB, Figueroa JF, Orav EJ, Blumenthal DM, Jha AK. Comparison of Hospital  
40 381 Mortality and Readmission Rates for Medicare Patients Treated by Male vs Female Physicians. JAMA  
41 382 INTERNAL MEDICINE. 2017;**177**(2):206-213.

42  
43 383 [7] Li X, Lu JP, Hu S, Cheng KK, et al. The primary health-care system in China. LANCET.  
44 384 2017;**390**(10112):2584-2594ELSEVIER SCIENCE INC.

45 385 [8] van Walraven C, Dhalla IA, Bell C, Etchells E, et al. Derivation and validation of an index to predict  
46 386 early death or unplanned readmission after discharge from hospital to the community. CANADIAN  
47 387 MEDICAL ASSOCIATION JOURNAL. 2010;**182**(6):551-557.

48  
49 388 [9] Brown PH, Theoharides C. HEALTH-SEEKING BEHAVIOR AND HOSPITAL CHOICE IN  
50 389 CHINA'S NEW COOPERATIVE MEDICAL SYSTEM. HEALTH ECONOMICS. 2009;**18**:S47-S64.

51 390 [10] Campbell J. Inappropriate admissions: thoughts of patients and referring doctors. J R Soc Med.  
52 391 2001;**94**(12):628-6312001-12-01].

53  
54 392 [11] Zhang YT, Tang WX, Zhang Y, Liu LL, Zhang L. Effects of integrated chronic care models on  
55 393 hypertension outcomes and spending: a multi-town clustered randomized trial in China. BMC PUBLIC  
56 394 HEALTH. 2017;**17**(244)BIOMED CENTRAL LTD.

- 1  
2  
3 395 [12] Zhang Y, Chen Y, Zhang X, Zhang L. Current level and determinants of inappropriate admissions to  
4 396 township hospitals under the new rural cooperative medical system in China: a cross-sectional study. BMC  
5 397 HEALTH SERVICES RESEARCH. 2014;**14**(649).
- 6 398 [13] Zhang Yan YTZL. Exploration of the hierarchical integration of rural medical institutions. Chinese  
7 399 Journal of Hospital Administration. 2016;**8**(32):614-617 'doi': 10.3760/cma.j.issn.1000-6672.2016.08.018['].
- 9 400 [14] Ye T, Sun XW, Tang WX, Miao Y, Zhang YD, Zhang L. Effect of continuity of care on health-related  
10 401 quality of life in adult patients with hypertension: a cohort study in China. BMC HEALTH SERVICES  
11 402 RESEARCH. 2016;**16**(674)BIOMED CENTRAL LTD.
- 12 403 [15] NHaFPCoC. *2017 China Statistics Yearbook of Health and Family Planning*. Beijing: China union  
13 404 medical university press, 2017.
- 14 405 [16] Herrin J, St Andre J, Kenward K, Joshi MS, Audet AJ, Hines SC. Community Factors and Hospital  
15 406 Readmission Rates. HEALTH SERVICES RESEARCH. 2015;**50**(1):20-39.
- 16 407 [17] Longford NT. Improved approximations for multilevel models with binary responses. JOURNAL OF  
17 408 THE ROYAL STATISTICAL SOCIETY SERIES A-STATISTICS IN SOCIETY. 1997;**160**(3):593.
- 18 409 [18] Lim SL, Ong KCB, Chan YH, Loke WC, Ferguson M, Daniels L. Malnutrition and its impact on cost of  
19 410 hospitalization, length of stay, readmission and 3-year mortality. CLINICAL NUTRITION.  
20 411 2012;**31**(3):345-350.
- 21 412 [19] Calvillo-King L, Arnold D, Eubank KJ, Lo M, et al. Impact of Social Factors on Risk of Readmission or  
22 413 Mortality in Pneumonia and Heart Failure: Systematic Review. JOURNAL OF GENERAL INTERNAL  
23 414 MEDICINE. 2013;**28**(2):269-282.
- 24 415 [20] Kogan AC, Koons E, Enguidanos S. Investigating the Impact of Intervention Refusal on Hospital  
25 416 Readmission. AMERICAN JOURNAL OF MANAGED CARE. 2017;**23**(12):E394-E401.
- 26 417 [21] Ross JS, Chen J, Lin Z, Bueno H, et al. Recent National Trends in Readmission Rates After Heart  
27 418 Failure Hospitalization. CIRCULATION-HEART FAILURE. 2010;**3**(1):97-103.
- 28 419 [22] Hartl S, Luis Lopez-Campos J, Pozo-Rodriguez F, Castro-Acosta A, et al. Risk of death and  
29 420 readmission of hospital-admitted COPD exacerbations: European COPD Audit. EUROPEAN  
30 421 RESPIRATORY JOURNAL. 2016;**47**(1):113-121.
- 31 422 [23] Vo D, Zurakowski D, Faraoni D. Incidence and predictors of 30-day postoperative readmission in  
32 423 children. PEDIATRIC ANESTHESIA. 2018;**28**(1):63-70.  
33  
34  
35  
36  
37  
38  
39  
40  
41  
42  
43  
44  
45  
46  
47  
48  
49  
50  
51  
52  
53  
54  
55  
56  
57  
58  
59  
60

## 425 Figure Legend

426 **Figure 1.** Map of Qianjiang distract: geographic distribution



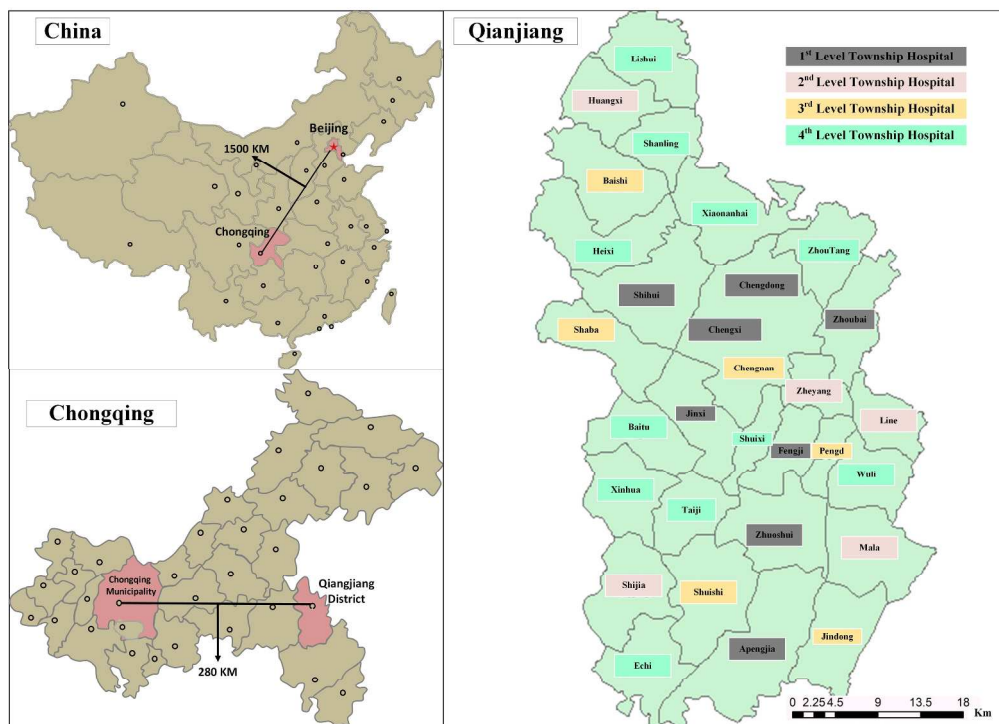

Map of Qianjiang district: geographic distribution

136x113mm (600 x 600 DPI)

**STROBE 2007 (v4) Statement—Checklist of items that should be included in reports of *cross-sectional studies***

| Section/Topic                | Item # | Recommendation                                                                                                                                                                       | Reported on Line #   |
|------------------------------|--------|--------------------------------------------------------------------------------------------------------------------------------------------------------------------------------------|----------------------|
| <b>Title and abstract</b>    | 1      | (a) Indicate the study’s design with a commonly used term in the title or the abstract                                                                                               | <b>Lines:1-2</b>     |
|                              |        | (b) Provide in the abstract an informative and balanced summary of what was done and what was found                                                                                  | <b>Lines:22-58</b>   |
| <b>Introduction</b>          |        |                                                                                                                                                                                      |                      |
| Background/rationale         | 2      | Explain the scientific background and rationale for the investigation being reported                                                                                                 | <b>Lines:60-126</b>  |
| Objectives                   | 3      | State specific objectives, including any prespecified hypotheses                                                                                                                     | <b>Lines:126-129</b> |
| <b>Methods</b>               |        |                                                                                                                                                                                      |                      |
| Study design                 | 4      | Present key elements of study design early in the paper                                                                                                                              | <b>Lines:152-154</b> |
| Setting                      | 5      | Describe the setting, locations, and relevant dates, including periods of recruitment, exposure, follow-up, and data collection                                                      | <b>Lines:131-143</b> |
| Participants                 | 6      | (a) Give the eligibility criteria, and the sources and methods of selection of participants                                                                                          | <b>Lines:145-147</b> |
| Variables                    | 7      | Clearly define all outcomes, exposures, predictors, potential confounders, and effect modifiers. Give diagnostic criteria, if applicable                                             | <b>Lines:148-152</b> |
| Data sources/<br>measurement | 8*     | For each variable of interest, give sources of data and details of methods of assessment (measurement). Describe comparability of assessment methods if there is more than one group | <b>Lines:152-166</b> |
| Bias                         | 9      | Describe any efforts to address potential sources of bias                                                                                                                            | <b>No</b>            |
| Study size                   | 10     | Explain how the study size was arrived at                                                                                                                                            | <b>Lines:167-168</b> |
| Quantitative variables       | 11     | Explain how quantitative variables were handled in the analyses. If applicable, describe which groupings were chosen and why                                                         | <b>Lines:169-177</b> |
| Statistical methods          | 12     | (a) Describe all statistical methods, including those used to control for confounding                                                                                                | <b>Lines:178-180</b> |
|                              |        | (b) Describe any methods used to examine subgroups and interactions                                                                                                                  | <b>Lines:180-190</b> |
|                              |        | (c) Explain how missing data were addressed                                                                                                                                          | <b>No</b>            |
|                              |        | (d) If applicable, describe analytical methods taking account of sampling strategy                                                                                                   | <b>No</b>            |
|                              |        | (e) Describe any sensitivity analyses                                                                                                                                                | <b>No</b>            |
| <b>Results</b>               |        |                                                                                                                                                                                      |                      |

|                          |     |                                                                                                                                                                                                              |                                   |
|--------------------------|-----|--------------------------------------------------------------------------------------------------------------------------------------------------------------------------------------------------------------|-----------------------------------|
| Participants             | 13* | (a) Report numbers of individuals at each stage of study—eg numbers potentially eligible, examined for eligibility, confirmed eligible, included in the study, completing follow-up, and analysed            | <b>Lines:197-204</b>              |
|                          |     | (b) Give reasons for non-participation at each stage                                                                                                                                                         | <b>No</b>                         |
|                          |     | (c) Consider use of a flow diagram                                                                                                                                                                           | <b>No</b>                         |
| Descriptive data         | 14* | (a) Give characteristics of study participants (eg demographic, clinical, social) and information on exposures and potential confounders                                                                     | <b>Lines:218-234</b>              |
|                          |     | (b) Indicate number of participants with missing data for each variable of interest                                                                                                                          | <b>No</b>                         |
| Outcome data             | 15* | Report numbers of outcome events or summary measures                                                                                                                                                         | <b>Lines:198-201</b>              |
| Main results             | 16  | (a) Give unadjusted estimates and, if applicable, confounder-adjusted estimates and their precision (eg, 95% confidence interval). Make clear which confounders were adjusted for and why they were included | <b>Lines:235-250</b>              |
|                          |     | (b) Report category boundaries when continuous variables were categorized                                                                                                                                    | <b>Lines:235-250</b>              |
|                          |     | (c) If relevant, consider translating estimates of relative risk into absolute risk for a meaningful time period                                                                                             | <b>No</b>                         |
| Other analyses           | 17  | Report other analyses done—eg analyses of subgroups and interactions, and sensitivity analyses                                                                                                               | <b>Lines:209-217</b>              |
| <b>Discussion</b>        |     |                                                                                                                                                                                                              |                                   |
| Key results              | 18  | Summarise key results with reference to study objectives                                                                                                                                                     | <b>Lines:252-271;<br/>332-338</b> |
| Limitations              | 19  | Discuss limitations of the study, taking into account sources of potential bias or imprecision. Discuss both direction and magnitude of any potential bias                                                   | <b>Lines:339-347</b>              |
| Interpretation           | 20  | Give a cautious overall interpretation of results considering objectives, limitations, multiplicity of analyses, results from similar studies, and other relevant evidence                                   | <b>Lines:272-328</b>              |
| Generalisability         | 21  | Discuss the generalisability (external validity) of the study results                                                                                                                                        | <b>Lines:329-331</b>              |
| <b>Other information</b> |     |                                                                                                                                                                                                              |                                   |
| Funding                  | 22  | Give the source of funding and the role of the funders for the present study and, if applicable, for the original study on which the present article is based                                                | <b>Lines:356-357</b>              |

\*Give information separately for cases and controls in case-control studies and, if applicable, for exposed and unexposed groups in cohort and cross-sectional studies.

**Note:** An Explanation and Elaboration article discusses each checklist item and gives methodological background and published examples of transparent reporting. The STROBE checklist is best used in conjunction with this article (freely available on the Web sites of PLoS Medicine at <http://www.plosmedicine.org/>, Annals of Internal Medicine at <http://www.annals.org/>, and Epidemiology at <http://www.epidem.com/>). Information on the STROBE Initiative is available at [www.strobe-statement.org](http://www.strobe-statement.org).

# BMJ Open

## Determinants of Patient Choice for Hospital Readmission after Township Hospitalisation: A Population-Based Retrospective Study in China

|                                 |                                                                                                                                                                                                                                                                                |
|---------------------------------|--------------------------------------------------------------------------------------------------------------------------------------------------------------------------------------------------------------------------------------------------------------------------------|
| Journal:                        | <i>BMJ Open</i>                                                                                                                                                                                                                                                                |
| Manuscript ID                   | bmjopen-2018-021516.R2                                                                                                                                                                                                                                                         |
| Article Type:                   | Research                                                                                                                                                                                                                                                                       |
| Date Submitted by the Author:   | 06-Jun-2018                                                                                                                                                                                                                                                                    |
| Complete List of Authors:       | Zhang, Yan; Huazhong University of Science and Technology Tongji Medical College, School of Medicine and Health Management<br>Yadong, Niu; Huazhong University of Science and Technology<br>ZHANG, LIANG; Huazhong University of Science and Technology Tongji Medical College |
| <b>Primary Subject Heading</b>: | Health services research                                                                                                                                                                                                                                                       |
| Secondary Subject Heading:      | Health services research, Health policy, Medical management                                                                                                                                                                                                                    |
| Keywords:                       | readmission, choice, county hospital, patient flow, rural China                                                                                                                                                                                                                |
|                                 |                                                                                                                                                                                                                                                                                |

SCHOLARONE™  
Manuscripts

1  
2  
3  
4 **1 Determinants of Patient Choice for Hospital Readmission after Township**  
5  
6 **2 Hospitalisation: A Population-Based Retrospective Study in China**  
7  
8  
9

10  
11  
12 4 Yan Zhang<sup>1,2</sup>, Yadong Niu<sup>1,2</sup>, Liang Zhang<sup>1,2</sup> §  
13  
14  
15

16  
17 <sup>1</sup> School of Medicine and Health Management, Tongji Medical College, Huazhong  
18  
19 University of Science and Technology, Wuhan, Hubei, 430030, China  
20  
21

22 <sup>2</sup> Research Centre for Rural Health Service, Key Research Institute of Humanities & Social  
23  
24 Sciences of Hubei Provincial Department of Education, Wuhan, Hubei, 430030, China  
25  
26

27  
28  
29 **11 Email addresses:**  
30

31 12 Y.Z. Yan Zhang Ph.D. yanzhang@hust.edu.cn  
32  
33

34 13 Y-D. N. Yadong Niu M.D. nyadong@126.com  
35

36 14 L.Z. Liang Zhang M.D. zhangliang@mails.tjmu.edu.cn  
37  
38

39  
40  
41 **16 §Corresponding author:**  
42

43  
44 Liang Zhang, zhangliang@mails.tjmu.edu.cn  
45  
46

47  
48  
49 **19 Word Count:** 3259  
50  
51

52  
53  
54  
55  
56  
57  
58  
59  
60

## 21 **Abstract**

22 **Objective:** The lack of coordinated and appropriate healthcare across sectors has produced  
23 more patients for county hospitals in China. This study examined differences in patient  
24 choice between township and county hospitals for readmission after a first township  
25 hospitalisation, and the determinants that influenced this choice.

26 **Design:** A retrospective study of readmissions across hospitals after a first admission in  
27 township hospital. A township–township inpatient (TT) group and a township–county  
28 inpatient (TC) group were compared. A two-level logistic regression model was used to  
29 examine the determinants of choice for hospital readmission.

30 **Setting:** Data were drawn from a population-based health utilisation database for  
31 Qianjiang District, China, from 1 January 2008 to 31 December 2013.

32 **Participants:** This study focused on readmitted patients whose first admission was in a  
33 township hospital. Readmission cases were identified as the same diagnosis (International  
34 Classification of Diseases, tenth revision) in a subsequent hospitalisation within 30 days. In  
35 total, 6,764 readmissions had first admissions in township hospitals.

36 **Primary outcome measures:** Patient choice for hospital readmission after a first township  
37 hospitalisation.

38 **Results:** The TT group accounted for 62.5% (4,225) and the TC group for 37.5% (2,539)  
39 of readmissions in 6 years. Readmission rates varied among towns ( $P < 0.001$ ). Differences  
40 between the TC and TT groups included: length of stay (LOS) of first admission (6.96 days  
41 vs. 9.23 days), average interval between admissions (6.03 days vs. 14.95 days) and disease  
42 category. Admission year, age, travel time to county hospital, interval between admissions,

1  
2  
3  
4 43 first admission LOS and disease category were determinants of choice for hospital  
5  
6 44 readmission.

7  
8 45 **Conclusions:** Patients whose first admission was in a township hospital were more likely  
9  
10 46 to be readmitted to a county hospital. A combination of first LOS and interval between  
11  
12 47 admissions may be an effective identification index for township–county readmission.

13  
14  
15 48 **Keywords:** readmission, choice, county hospital, patient flow, rural China

## 19 49 **Strengths and limitations**

- 20  
21  
22 50 • This is the first study to focus on township–county readmission, a feature of  
23  
24 51 hospitalisation in rural China.
- 25  
26 52 • Population-level data on readmission is seldom reported across hospitals of different  
27  
28 53 levels.
- 29  
30 54 • Programming techniques, including Microsoft Excel formulas and case processing  
31  
32 55 technologies, were used in the data processing.
- 33  
34 56 • A two-level logistic regression model was used to consider aggregation at the town level.
- 35  
36 57 • Hospitalisation information, geographical factors, interval status and disease were all  
37  
38 58 entered into the logistic regression model, but some individual factors were missing.

## 44 45 59 **Background**

46  
47  
48 60 Readmission refers to an episode where an inpatient is readmitted for the same disease  
49  
50 61 with 30 days.<sup>[1, 2]</sup> In most studies, readmission findings reflect that inpatient care did not  
51  
52 62 meet patient requirements, with readmission rates used as an evaluation index for  
53  
54 63 hospitalisation quality.<sup>[3]</sup> Readmission usually occurs in the same hospital, but sometimes

1  
2  
3  
4 64 occurs across hospitals because of deterioration of a patient's disease.<sup>[4]</sup> However, in rural  
5  
6 65 China, multilevel institutional readmission is a common and important healthcare  
7  
8 66 utilisation. This reflects defects of China's healthcare delivery system, rather than  
9  
10  
11 67 hospitalisation quality, especially in township–county (TC) readmissions. TC readmission  
12  
13 68 is a health-seeking behaviour in which inpatients seek healthcare services in a township  
14  
15 69 hospital first, and then in a county hospital, whether planned or unplanned, voluntarily or  
16  
17 70 passively. TC readmission is frequent in rural China, and currently accounts for  
18  
19  
20 71 approximately 2.0% of all inpatient services.<sup>[5]</sup> TC readmission usually occurs following  
21  
22 72 doctor recommendation/referral or by individual patient choice.  
23  
24  
25 73 TC readmission recommended by doctors occurs when a township doctor has an inpatient  
26  
27 74 admission that they cannot fully treat or completely cure,<sup>[6]</sup> consequently, that patient is  
28  
29 75 referred directly to a county hospital or advised to go to a county hospital for subsequent  
30  
31 76 admission.<sup>[6]</sup> This situation results from the three-tier healthcare delivery system in rural  
32  
33 77 China, where care is provided in a village–town–county healthcare delivery system, and all  
34  
35 78 hospital services are supplied by township and county hospitals.<sup>[7]</sup> In general, the higher  
36  
37 79 the level of the institution, the stronger the service capability, the greater the distance a  
38  
39 80 patient must travel and the higher the medical cost. Township hospitals bear the  
40  
41 81 responsibilities of transferring patients, taking care of inpatients with general illnesses and  
42  
43 82 advising patients with severe diseases (that are beyond their capacity) to seek admission at  
44  
45 83 county hospitals.<sup>[8]</sup> Township hospital doctors sometimes receive patients whose diseases  
46  
47 84 are beyond their capacity to manage (e.g. because of their inaccurate judgment, or  
48  
49 85 deterioration of the disease), meaning TC readmission may be unavoidable.  
50  
51  
52  
53  
54  
55  
56  
57  
58  
59  
60



1  
2  
3  
4 86 TC readmission from individual choice may occur when patients who should be readmitted  
5  
6 87 to township hospitals choose to be admitted to county hospitals for personal reasons.<sup>[9]</sup>  
7  
8 88 Some readmissions are influenced by quality concerns with township hospitals, poor  
9  
10 89 patient compliance on medicine and after-care or from a normal disease recurrence.  
11  
12  
13 90 However, patients often do not acknowledge the real readmission reason and transfer  
14  
15 91 responsibility for readmission to the township hospital doctor (e.g. considering readmission  
16  
17 92 as a result of failed treatment) and consequently decide to be readmitted to a county  
18  
19 93 hospital. This situation often represents inappropriate readmission.<sup>[10]</sup>  
20  
21  
22  
23 94 From the patients' perspective, no order or limitation on patient choice exists. In addition,  
24  
25 95 no general practitioners or consultants are available in rural China. Therefore, residents  
26  
27 96 freely choose hospitals and service types, mainly depending on their judgment regarding  
28  
29 97 their disease and understanding of hospitals. If a patient chooses a higher-level institution  
30  
31 98 than necessary, they pay more; if they choose a lower-level institution than necessary they  
32  
33 99 would be referred or readmitted. Therefore, the cost of an incorrect decision is borne by the  
34  
35 100 patient. To guarantee patient interests regarding TC readmission, the three-tier healthcare  
36  
37 101 delivery system requires different-level hospitals to cooperate in providing continuous  
38  
39 102 healthcare services. However, in reality, communication among township and county  
40  
41 103 professional providers is limited, and there is virtually no document sharing or interaction  
42  
43 104 among providers across the three tiers.<sup>[11]</sup> County hospital doctors do not deliver  
44  
45 105 continued care for readmitted patients because of income incentives and risk aversion, and  
46  
47 106 patients readmitted to a county hospital usually receive new treatment.<sup>[12]</sup> Furthermore,  
48  
49 107 compared with patients admitted directly to county hospitals, readmitted patients spend

1  
2  
3  
4 108 more time, pay more costs and may even miss proper treatments. As a result, when  
5  
6 109 subsequent illnesses occur and patients are unable to judge the severity of their illness, they  
7  
8 110 tend to choose admission in a county hospital, taking excess economic risk to avoid delay.  
9  
10 111 Some studies have defined TC readmission as failed treatment from the patients'  
11  
12 perspective, and shown that the TC readmission experience can influence a patient's later  
13  
14 112 choice of hospital.<sup>[13, 14]</sup> Inpatients may be more likely to seek care in county hospitals  
15  
16 113 compared with township hospitals; a phenomenon that is already happening. The annual  
17  
18 114 growth rate of inpatients in county hospitals from 2010 to 2016 was 6.75%, whereas that of  
19  
20 115 township hospital inpatients was 0.63% in rural China.<sup>[15]</sup>  
21  
22  
23 116 As noted, TC readmission from individual choice may be an inappropriate level of  
24  
25 117 admission, and TC readmission recommended by doctors can also result in inappropriate  
26  
27 118 level admission for subsequent hospitalisation. Inappropriate level admission means  
28  
29 119 patients seek healthcare in a higher-level hospital than necessary. This may result from  
30  
31 120 patients' intentional institution selection and distrust of the capability of township hospitals;  
32  
33 121 such patients prefer to spend more money on healthcare to avoid the risk of needing  
34  
35 122 referral. Inappropriate level admission is a major form of excess service demand,<sup>[12]</sup> and  
36  
37 123 an important determinant of increasing health expenditure that leads to significant waste.  
38  
39 124 In this context, identifying the forms and determinants of TC readmission will help to  
40  
41 125 improve the New Rural Cooperative Medical System (NRCMS). This study focused on  
42  
43 126 choices for hospital readmission after a first admission as an inpatient in a township  
44  
45 127 hospital, and identified the determinants of choice for hospital readmission.  
46  
47  
48  
49  
50  
51  
52  
53  
54  
55  
56  
57  
58  
59  
60

## 129 **Methods**

### 130 **Study setting**

131 Qianjiang District was designated as the sample area through cluster sampling. This is a  
132 typical rural area located in Chongqing, which is the largest municipality in southwest  
133 China. Qianjiang has a per capita GDP of \$7,515 in 2016, which is below the average GDP  
134 in China. The resident population is 550,000 people; all residents are covered under the  
135 NRCMS, and are eligible to receive reimbursement for inpatient care. Qianjiang District  
136 has two county hospitals and 30 township hospitals. The township hospitals are divided  
137 into four levels according to their scale and service quantity by Qianjiang Health Bureau  
138 (Fig. 1). First-level township hospitals are allocated more than 30 beds and may perform  
139 abdominal operations; these hospitals had more than 1,200 discharged patients in 2013.  
140 Second-level township hospitals cannot perform abdominal operations of the same scale as  
141 first-level township hospitals. Third-level township hospitals have fewer than 30 beds and  
142 around 600~1,200 discharged patients. All other township hospitals belong to the fourth  
143 level.

1  
2  
3  
4 144 **Data source**  
5  
6

7 145 This study was based on the NRCMS inpatient database in Qianjiang District, which  
8  
9 146 contains all inpatient data for the population. In this database, a case refers to a single  
10  
11  
12 147 hospitalisation in a county or township hospitals.  
13

14  
15 148 **Data processing**  
16

17  
18 149 We focused on individuals who had been discharged from participating hospitals.  
19  
20 150 Readmission cases were identified as having the same diagnosis in subsequent  
21  
22 151 hospitalisations between county and township hospitals or township hospitals and township  
23  
24 152 hospitals within 30 days. Given our population-based retrospective design, we compared  
25  
26  
27 153 the differences between township–township readmitted inpatients (TT group) and TC  
28  
29 154 readmitted inpatients (TC group). Samples were entered into MS Excel 2010, based on the  
30  
31 155 NRCMS database from 1 January 2008 to 31 December 2013. First, cases that shared the  
32  
33 156 same patient identifier and the same disease codes were sorted in chronological order.  
34  
35  
36 157 Second, we calculated the interval between admissions in two adjacent cases for the same  
37  
38 158 inpatient for the same disease; if the interval between admissions was less than 31 days, the  
39  
40 159 patient was marked as a readmission patient. For example, if the first admission occurred  
41  
42 160 in a township hospital and the second occurred in county hospital, the two cases would be  
43  
44 161 merged as one case and marked as a TC readmission, and the patient marked as TC patient.  
45  
46  
47 162 TT patients were identified in a similar manner. Finally, all TC and TT cases were  
48  
49 163 extracted into a new database. As diagnosis of a disease may change among different  
50  
51  
52 164 doctors, in different institutions or at different times, we adjusted the original International  
53  
54  
55  
56  
57  
58  
59  
60

1  
2  
3  
4 165 Classification of Diseases, tenth revision disease code into a broader code (e.g. chronic  
5  
6 166 obstructive pulmonary disease was adjusted from J44.900 to J44), which may improve  
7  
8 167 accuracy in identifying readmitted patients. After screening, there were 6,764 readmitted  
9  
10  
11 168 patients from 2008–2013 in the sample.

12  
13 169 The main programming techniques included Microsoft Excel formulas (e.g. COUNTIF,  
14  
15  
16 170 SUMPRODUCT, LOOKUP and IF) and case processing technologies (e.g. split columns  
17  
18 171 and removal of duplicates).

19  
20 172 Sociological characteristics were collected to build a final database, including: gender; age;  
21  
22  
23 173 travel time from home to county hospital; first inpatient information including length of  
24  
25 174 stay (LOS), expenses, disease category, capacity of the township hospital, interval between  
26  
27  
28 175 admissions and readmitted hospital choice.<sup>[16]</sup> The distance and travel time to the county  
29  
30 176 hospital for all readmitted patients were captured individually by Google Maps. Because  
31  
32  
33 177 traffic conditions are different in different towns (e.g. national roads, provincial roads or  
34  
35 178 county roads), both the distance and travel time were captured.

### 36 37 38 179 **Data obtained and Statistical analysis**

39  
40  
41 180 The characteristics of patients' choices for hospital readmission were compared using  
42  
43  
44 181 t-tests and chi-square tests in IBM SPSS Statistics 22.0. The treatment capacity of  
45  
46 182 township hospitals and the travel time to a county hospital from different towns have  
47  
48  
49 183 differential impacts on the observed predictors. Therefore, we assumed that the obtained  
50  
51 184 data indicated a hierarchical structure, and the 6,764 records could be aggregated by town  
52  
53  
54 185 level. The determinants of choice for hospital readmission were examined using multilevel  
55  
56 186 binomial logistic regression analysis using MLwiN 2.30, which was developed by the

1  
2  
3  
4 187 University of Bristol, UK.<sup>[17]</sup> Patients were identified as level 1 and town as level 2. The  
5  
6 188 regression model was as follows.

7  
8  
9  
10  
11  
12  
13  
14  
15  
16  
17  
18  
19  
20  
21  
22  
23  
24  
25  
26  
27  
28  
29  
30  
31  
32  
33  
34  
35  
36  
37  
38  
39  
40  
41  
42  
43  
44  
45  
46  
47  
48  
49  
50  
51  
52  
53  
54  
55  
56  
57  
58  
59  
60

$$\log it(\pi_{ij}) = \beta_0 \text{cons} + \beta_1 \text{Admitted Year}_{ij} + \beta_2 \text{Gender}_{ij} + \beta_3 \text{Age}_{ij} + \beta_4 \text{Distance}_{ij} + \beta_5 \text{Time}_{ij} \\ + \beta_6 \text{Capacity}_{ij} + \beta_7 \text{1st LOS}_{ij} + \beta_8 \text{1st Expend}_{ij} + \beta_9 \text{Interval}_{ij} + \text{More14}_{ij}$$

$$\beta_{0j} = \beta_0 + u_{0j}$$

191  $\beta_i$  refers to the fixed effects parameter, and  $u_{0j}$  refers to the random effects of level 2.

## 192 **Patient and Public Involvement**

193 No patients or public were involved in this research.

## 194 **Ethical approval**

195 The study protocol conformed to the guidelines of the Ethics Committee of the Tongji  
196 Medical College of Huazhong University of Science and Technology. The protocol was  
197 registered in the Chinese Clinical Trial Registry (ChiCTR-OOR-14005563). Patient  
198 information was anonymised and de-identified before analysis.

## 199 **Results**

### 200 **Choices for hospital readmission after a first township hospitalisation**

201 Among 271,405 discharged admissions in 2008–2013, there were 6,764 readmissions after  
202 a first hospitalisation in a township hospital. The TT group accounted for 62.5% (4,225) of  
203 all readmissions and the TC group for 37.5% (2,539) (Table 1). The number of  
204 readmissions increased sharply, whereas the proportion of readmissions in the total  
205 inpatients averaging around 5%. The TC group increased from 1.66% in 2008 to 1.89% in  
206 2013, with the annual growth rate of the TC group being 28.55%, which was higher than

207 that of the TT group (22.38%).

208 **Table 1. Number of readmissions each year in Qianjiang district (2008–2013)**

| Year         | All inpatients | Readmissions* n (%) | Choice for hospital readmission** |                     | P***   |
|--------------|----------------|---------------------|-----------------------------------|---------------------|--------|
|              |                |                     | TT group n (%)                    | TC group n (%)      |        |
| 2008         | 21,823         | 524 (4.80)          | 342 (3.14)                        | 182 (1.66)          | <0.001 |
| 2009         | 34,240         | 1,076 (6.27)        | 724 (4.23)                        | 352 (2.04)          |        |
| 2010         | 35,866         | 942 (5.25)          | 608 (3.39)                        | 334 (1.86)          |        |
| 2011         | 50,616         | 1,260 (4.98)        | 797 (3.16)                        | 463 (1.82)          |        |
| 2012         | 61,467         | 1,384 (4.50)        | 815 (2.64)                        | 569 (1.86)          |        |
| 2013         | 67,392         | 1,578 (4.67)        | 939 (2.78)                        | 639 (1.89)          |        |
| <b>Total</b> | <b>271,405</b> | <b>6,764 (4.98)</b> | <b>4,225 (3.11)</b>               | <b>2,539 (1.87)</b> |        |

209 \* Readmission refers to readmissions whose first admission was in a township hospital.

210 \*\* One readmission includes two admissions.

211 \*\*\* Pearson's chi-square test.

212 Readmission varied among towns (Table 2). Chengnan town had the lowest overall

213 readmission ratio (2.95%) and the lowest TT readmission ratio (1.52%) of the 30 towns.

214 Heixi town had the lowest TC readmission ratio (1.30%), Shijia town had the highest TC

215 readmission ratio (2.86%) and Jindong town had the highest TT readmission (5.49%) and

216 overall readmission (6.96%) ratios.

217 **Table 2. Number of readmissions Qianjiang district (2008–2013), by town**

| Town         | All inpatients | Readmissions* n (%) | Choice for hospital readmission** |                    | P***   |
|--------------|----------------|---------------------|-----------------------------------|--------------------|--------|
|              |                |                     | TT group n (%)                    | TC group n (%)     |        |
| Chengnan     | 11,716         | 173 (2.95)          | 89 (1.52)                         | 84 (1.43)          | <0.001 |
| Heixi        | 9,073          | 137 (3.02)          | 78 (1.72)                         | 53 (1.30)          |        |
| Shaba        | 8,778          | 152 (3.20)          | 81 (1.58)                         | 71 (1.62)          |        |
| ~            | ~              | ~                   | ~                                 | ~                  |        |
| Shijia       | 8,605          | 223 (5.18)          | 100 (2.32)                        | 123 (2.86)         |        |
| Jindong      | 6,007          | 209 (6.96)          | 165 (5.49)                        | 44 (1.47)          |        |
| <b>Total</b> | <b>271,405</b> | <b>6,764 (4.98)</b> | <b>4225 (3.11)</b>                | <b>2539 (1.87)</b> |        |

218 \* Readmission refers to readmissions whose first admission was in a township hospital.

219 \*\* One readmission includes two admissions.

220 \*\*\* Pearson's chi-square test.

### 221 **Characteristics of readmitted patients between TT and TC groups**

222 Table 3 shows the characteristics of readmitted patients from 2008–2013. Male patients  
 223 accounted for 48.7% of the TC group, which was a higher rate than in the TT group (41.9%,  
 224  $P < 0.001$ ). Readmission choices varied in different age groups ( $P < 0.001$ ), with over half  
 225 (57.9%) of patients in the TC group aged 40–59 years. The most common interval between  
 226 admissions in the TC group was shorter than 3 days (61.1%), whereas that in the TT group  
 227 was 16–30 days (50.6%,  $P < 0.001$ ). The average interval between admissions in the TC  
 228 group was lower than that in TT group (6.03 days vs. 14.95 days). Similar patterns were  
 229 observed in the average LOS of first inpatient admissions (6.96 days vs. 9.23 days) and  
 230 travel time to county hospital (59.73 minutes vs. 61.79 minutes). However, an opposite  
 231 trend was observed in terms of expenses of first inpatient admission (¥831.35 vs. ¥791.01).  
 232 The TC group mostly had respiratory (37.7%) and digestive diseases (20.3%). There were  
 233 no significant differences in the distance to a county hospital and the township hospital  
 234 capacity between the TT and TC groups.

235 **Table 3. Distribution of characteristics of readmitted patients ( $n = 6,764$ )**

| Variable            | All n (%)    | Choice for hospital readmission |                | <i>P</i> |
|---------------------|--------------|---------------------------------|----------------|----------|
|                     |              | TT group n (%)                  | TC group n (%) |          |
| All                 | 6,764        | 4,225 (62.5)                    | 2,539(37.5)    |          |
| Gender              |              |                                 |                | <0.001*  |
| Male                | 3,006 (44.4) | 1,769(41.9)                     | 1,237(48.7)    |          |
| Female              | 3,758(55.6)  | 2,456(58.1)                     | 1,302(51.3)    |          |
| Age, years          |              |                                 |                |          |
| Mean (SD)           | 48.18 (0.27) | 46.94(0.35)                     | 50.25(0.43)    | <0.001** |
| Less than 20        | 950 (22.0)   | 629(22.9)                       | 321(20.5)      | <0.001*  |
| 20–39               | 1,215 (28.2) | 877(31.9)                       | 338(21.6)      |          |
| 40–59               | 2,045 (47.4) | 1,192(43.4)                     | 853(54.4)      |          |
| More than 59        | 103 (2.4)    | 48(1.7)                         | 55(3.5)        |          |
| Distance to CH (km) |              |                                 |                |          |



|                                   |                 |               |                 |          |
|-----------------------------------|-----------------|---------------|-----------------|----------|
| Mean (SD)                         | 36.29 (0.27)    | 35.99(0.34)   | 36.78(0.42)     | 0.15**   |
| Time to CH (min)                  |                 |               |                 |          |
| Mean (SD)                         | 60.51 (0.45)    | 59.73(0.57)   | 61.79(0.72)     | 0.03**   |
| Capacity of TH                    |                 |               |                 |          |
|                                   |                 |               |                 | 0.53*    |
| 1st level (Strong)                | 3,076 (45.5)    | 1918(45.4)    | 1158(45.6)      |          |
| 2nd level (Better)                | 1,315 (19.4)    | 802(19)       | 513(20.2)       |          |
| 3rd level (General)               | 9,35 (13.8)     | 591(14)       | 344(13.5)       |          |
| 4th level (Weak)                  | 1,438 (21.3)    | 914(21.6)     | 524(20.6)       |          |
| 1st LOS (day)                     |                 |               |                 |          |
| Mean (SD))                        | 8.38 (0.12)     | 9.23(0.16)    | 6.96(0.16)      | <0.001** |
| 1st Expense (RMB)                 |                 |               |                 |          |
| Mean (SD)                         | 816.21 (7.94)   | 831.35(9.95)  | 791.01(13.14)   | 0.01**   |
| 2nd LOS (day)                     |                 |               |                 |          |
| Mean (SD)                         | 10.24 (0.13)    | 10.03(0.16)   | 10.58(0.22)     | 0.04**   |
| 2nd Expense (RMB)                 |                 |               |                 |          |
| Mean (SD)                         | 2215.49 (45.46) | 862.99(12.77) | 4466.09(104.99) | <0.001** |
| Interval between admissions (day) |                 |               |                 |          |
| Mean (SD)                         | 11.6 (0.12)     | 14.95(0.14)   | 6.03(0.17)      | <0.001** |
| ~3                                | 2,133(31.5)     | 582(13.8)     | 1551(61.1)      | <0.001*  |
| 3-7                               | 761 (11.3)      | 517(12.2)     | 244(9.6)        |          |
| 7-15                              | 1,328 (19.6)    | 987(23.4)     | 341(13.4)       |          |
| 16-31                             | 2,542 (37.6)    | 2139(50.6)    | 403(15.9)       |          |
| Disease category                  |                 |               |                 |          |
|                                   |                 |               |                 | <0.001*  |
| Cancer                            | 178 (2.6)       | 109(2.6)      | 69(2.7)         |          |
| ENT disease                       | 338 (5.0)       | 243(5.8)      | 95(3.7)         |          |
| Respiratory disease               | 2,673 (39.5)    | 1715(40.6)    | 958(37.7)       |          |
| Circulatory disease               | 450 (6.7)       | 224(5.3)      | 226(8.9)        |          |
| Digestive disease                 | 984 (14.5)      | 469(11.1)     | 515(20.3)       |          |
| Urinary disease                   | 269 (4.0)       | 89(2.1)       | 180(7.1)        |          |
| Haematological disorders          | 19 (0.2)        | 2(0.1)        | 17(0.7)         |          |
| Bones and muscles                 | 425 (6.3)       | 218(5.2)      | 207(8.2)        |          |
| Obstetrics and gynaecology        | 1,213 (17.9)    | 1037(24.5)    | 176(6.9)        |          |

236 \* Pearson's chi-square test.

237 \*\* ANOVA.

## 238 **Determinants of choice for hospital readmission after township hospitalisation**

239 The two-level logistic regression is illustrated by the level 2 variance of the zero model.

240 This was statistically significant ( $\chi^2 = 63.524$ ,  $P < 0.001$ ), with aggregation of information  
 241 at the town level. The specific results of the explanatory variables to fit the two variance  
 242 component model are shown in Table 4. The major determinants of the choice for hospital  
 243 readmission after a first township hospitalisation were admission year, age, travel time to a  
 244 county hospital, interval between admissions, first LOS and disease category. If other  
 245 factors remained constant, patients in the group aged 40–59 years were more likely to be  
 246 readmitted to a county hospital (odds ratio [OR] = 1.32). Other factors associated with TC  
 247 readmission were a shorter travel time to county hospital, shorter LOS, shorter interval  
 248 between admissions, urinary tract diseases (OR = 2.68) or first admission/readmission in a  
 249 more recent year. The ratio of patients with obstetric or gynaecological diseases readmitted  
 250 to a county hospital was much lower than that of patients with cancer (OR = 0.40).

251 **Table 4. Multilevel logistic regression model for hospital readmission choice**

|                                      | Parameter estimate | Standard error | $\chi^2$ | P      | Adjusted OR |
|--------------------------------------|--------------------|----------------|----------|--------|-------------|
| <b>Fixed Part:</b>                   |                    |                |          |        |             |
| Constant                             | -271.3             | 41.231         | 49.524   | <0.001 |             |
| Admitted year*                       | 0.136              | 0.027          | 47.934   | <0.001 | 1.14        |
| Gender(reference: female)            |                    |                |          |        |             |
| Male                                 | -0.003             | 0.066          | 0.003    | 0.955  | 1.00        |
| Age (reference: less than 20)        |                    |                |          |        |             |
| 20–39                                | -0.062             | 0.123          | 0.250    | 0.617  | 0.94        |
| 40–59                                | 0.294              | 0.111          | 6.870    | 0.008  | 1.32        |
| More than 59                         | 0.034              | 0.102          | 0.116    | 0.735  | 1.03        |
| Travel time (min)                    | -0.023             | 0.013          | 17.468   | <0.001 | 0.97        |
| Capacity of TH**                     | -0.017             | 0.035          | 0.204    | 0.658  | 0.98        |
| 1st LOS (day)                        | -0.036             | 0.006          | 53.177   | <0.001 | 0.96        |
| 1st Expends (RMB)                    | 0.001              | 0.001          | 1.323    | 0.255  | 1.00        |
| 2nd LOS (day)                        | -0.002             | 0.003          | 0.213    | 0.644  | 0.99        |
| Interval between admissions (day)    | -0.110             | 0.004          | 895.49   | <0.001 | 0.90        |
| Disease category (reference: cancer) |                    |                |          |        |             |

|                            |        |       |        |        |       |
|----------------------------|--------|-------|--------|--------|-------|
| ENT                        | -0.406 | 0.263 | 2.462  | 0.131  | 0.67  |
| Respiratory disease        | -0.256 | 0.217 | 1.327  | 0.251  | 0.78  |
| Circulatory disease        | 0.512  | 0.256 | 4.627  | 0.028  | 1.64  |
| Digestive disease          | 0.553  | 0.227 | 6.217  | 0.013  | 1.74  |
| Urinary disease            | 0.982  | 0.264 | 13.950 | <0.001 | 2.68  |
| Haematological disorders   | 2.310  | 0.853 | 7.641  | 0.004  | 10.03 |
| Bones and muscles          | 0.245  | 0.242 | 1.066  | 0.301  | 1.28  |
| Obstetrics and gynaecology | -0.947 | 0.238 | 15.874 | <0.001 | 0.40  |
| Else                       | -0.132 | 0.265 | 0.251  | 0.617  | 0.88  |
| <b>Random Part:</b>        |        |       |        |        |       |
| Town variance              | 0.153  | 0.036 | 17.921 | <0.001 | —     |
| Patient scale parameter    | 1      | 0.00  | —      | —      | —     |

252 \* TC shows a stable increase in recent years, so admitted year was included in the analysis by order of ranked data.

253 \*\* Capacity of township hospital included in the analysis by order of ranked data.

## 254 Discussion

### 255 Choice for hospital readmission and aggregation

256 Readmission is common and unavoidable, and can often be attributed to technology and  
 257 management problems.<sup>[18]</sup> TC readmission accounted for 1.89% of all hospitalisation  
 258 cases in Qianjiang in 2013, showing steady growth from 2008 (1.66%). In the study period,  
 259 TC readmission accounted for more than one-third of readmission cases that had a first  
 260 inpatient admission in a township hospital, which is common in rural China. However, as  
 261 mentioned, TC readmission (either through doctor referral/recommendation or the patient's  
 262 choice) often reflects an inefficient use of health services for patients; TC readmission  
 263 patients may experience disease delays or cost waste, which may result in patient  
 264 dissatisfaction regarding the township hospital. A point that needs to be noted here is the  
 265 uncertainty about whether TT patients had been readmitted to a county hospital three or  
 266 more times, which has been reported as a real scenario.

1  
2  
3  
4 267 The two-level logistic regression analysis showed a hierarchy in the inpatient data (town–  
5  
6 268 patients). Patients' choice of hospital readmission was clustered at the town level. In other  
7  
8 269 words, 6,764 readmitted patients were non-independent, and the choices for hospital  
9  
10 270 readmission in same town tended to be approximated. The incidence differed in different  
11  
12 271 towns, from 2.95% (Chengnan) to 6.96% (Jindong). The 30 towns in the study area also  
13  
14 272 differed in terms of township hospital, social customs and geographic location. Different  
15  
16 273 township hospitals also have different service concepts and medical capabilities, which  
17  
18 274 might have affected patients' hospital readmission choice.  
19  
20  
21  
22  
23

#### 24 **Determinants of choice for hospital readmission**

25  
26 276 Logistic regression analysis showed that patient gender, capacity of township hospital and  
27  
28 277 first admission expenses did not have significant effects on the choice of hospital for  
29  
30 278 readmission. Readmission choice was affected by age, travel time to a county hospital,  
31  
32 279 interval between admissions, LOS in the first admission and disease category. Although the  
33  
34 280 towns in which patients lived affected their choice of hospital for readmission, the capacity  
35  
36 281 of township hospitals had no significant effects; therefore, the town-based effects could be  
37  
38 282 speculatively attributed to social customs and geographic location, which is consistent with  
39  
40 283 a previous study.<sup>[19]</sup> In other words, regardless of capacity of the township hospital,  
41  
42 284 readmission is unavoidable and occurs under the same rate; in theory, TC readmission  
43  
44 285 resulted from the doctors' assessment of their treatment ability, or deterioration of disease  
45  
46 286 rather than the general hospital capacity.<sup>[20]</sup>  
47  
48  
49  
50  
51  
52  
53  
54 287 In general, patients were more likely to be readmitted to a county hospital if they were in  
55  
56  
57  
58  
59  
60

1  
2  
3  
4 288 an older age group, found travel to a county hospital more convenient, had lower expenses,  
5  
6 289 had a shorter interval between admissions or diseases that were harder to assess. The ratio  
7  
8 290 of patients choosing to be readmitted to a county hospital increased with age, which may  
9  
10 291 be a result of the increased attention to the cure rate among those of more advanced age.  
11  
12  
13 292 The OR for travel time to a county hospital was 0.97, indicating that patients made their  
14  
15 293 choice based on convenience.<sup>[16-19]</sup> The most obvious influencing factors were first LOS  
16  
17 294 and the interval between admissions. These factors can be combined to discuss the  
18  
19 295 difference in choice. The average first LOS in the TT group was 9.23 days, which is close  
20  
21 296 to 9.7 days, the standard LOS in township hospitals in China.<sup>[15]</sup> Moreover, the average  
22  
23 297 interval between admissions was 14.95 days. In the TC group, the average first LOS was  
24  
25 298 6.96 days and the interval between admissions was 6.03 days. A shorter first LOS ( $OR =$   
26  
27 299 0.96) and a shorter the interval between admissions ( $OR = 0.90$ ) was associated with a  
28  
29 300 greater likelihood of choosing a county hospital. This disparity may be associated with the  
30  
31 301 degree of urgency of the disease. Patients with diseases related to the urinary system ( $OR =$   
32  
33 302 2.68) and haematological disorders ( $OR = 10.03$ ) were more likely to choose a county  
34  
35 303 hospital compared with patients with cancer, respiratory diseases and other disease types.  
36  
37 304 This finding may be related to township doctor assessment regarding treatment ability.  
38  
39 305 Diseases in the urinary system, cardiovascular system and haematological disorders cannot  
40  
41 306 be controlled well in township hospitals, leading to a higher rate of inaccurate assessments  
42  
43 307 and a higher probability of readmission to a county hospital.<sup>[21]</sup> Respiratory and digestive  
44  
45 308 diseases (e.g. influenza, paediatric bronchial pneumonia and chronic obstructive  
46  
47 309 pulmonary disease<sup>[22]</sup>) have a high incidence and recurrence rate and can be controlled in  
48  
49  
50  
51  
52  
53  
54  
55  
56  
57  
58  
59  
60

1  
2  
3  
4 310 township hospitals. However, these diseases often have failed treatment outcomes because  
5  
6 311 of poor patient compliance on medicine and after-care.<sup>[23]</sup> Consequently, these patients  
7  
8 312 may be more likely to choose county hospitals for readmission. Moreover, readmissions  
9  
10  
11 313 tended to move toward county hospitals as year increased ( $OR = 1.14$ ), which implies an  
12  
13 314 endogenous factor as affected the increase of inpatients in county hospitals in recent years.

### 16 315 **Identifying forms of TC readmission**

19 316 We could differentiate TC admission from TT admission by first LOS and interval between  
20  
21 317 admissions. Intervals in TC patient admission showed a U-shaped distribution; 61.1% were  
22  
23 318 readmitted to a county hospital within 3 days, and a small prevalence peak appeared in the  
24  
25 319 group after more than 15 days. Correspondently, 50.1% of patients in the TT group had an  
26  
27 320 interval between admissions of more than 15 days. Therefore, a considerable proportion of  
28  
29 321 early readmissions might be referrals; patients readmitted after a short first LOS with a  
30  
31 322 short interval may be assumed to have been referred by doctors. A long first LOS and long  
32  
33 323 interval were more likely to indicate a TC caused by individual choice, meaning an  
34  
35 324 inappropriate TC readmission. Longer first LOS means a complete treatment in township  
36  
37 325 hospital, and longer interval indicates readmission may have been caused by poor  
38  
39 326 compliance on medicine and after-care from patients themselves or a normal disease  
40  
41 327 recurrence. Therefore, a combination of first LOS and interval may be an effective  
42  
43 328 identification index; we used 1 week as the cut-off value (Table 3). TC readmissions based  
44  
45 329 on a doctor's incorrect assessment accounted for approximately 70.7% of admissions  
46  
47 330 (interval between admissions <7 days), and those caused by patients accounted for 29.3%  
48  
49 331 (interval between admissions >7 days).

1  
2  
3  
4 332 The sample county is a typical rural area, and this research is a population based study, so  
5  
6 333 the results could present the TC phenomenon in all rural China.  
7  
8

## 9 334 **Conclusions**

10  
11  
12 335 Patients were more likely to choose a county hospital for readmission over time. TC  
13  
14 336 readmission remains a common health service use in rural China, and may result in  
15  
16  
17 337 inappropriate patient flows. Differences in readmission choices were associated with age,  
18  
19 338 travel time to county hospital, first LOS, interval between admissions and diseases; all of  
20  
21 339 these factors are easy to identify. Combination of first LOS and interval between  
22  
23  
24 340 admissions could be an effective identification index for the forms of TC readmission.  
25  
26  
27

## 28 341 **Limitations**

29  
30  
31 342 Our study has several limitations. Hospitalisation information, geographical factors,  
32  
33 343 interval status and disease were all entered into the logistic regression model. However,  
34  
35 344 some individual factors (e.g. economic status, education and preference) were not available.  
36  
37  
38 345 Moreover, influence on choice of hospitals may reflect an accumulated process, meaning  
39  
40 346 that the more patients experience TC readmission, the more significant the influence would  
41  
42 347 become. However, we only studied the influence of the first TC readmission in a single  
43  
44 348 year. These limitations may bring instability to our study and need to be resolved in future  
45  
46  
47 349 studies.  
48  
49

## 50 350 **Competing interests**

51  
52  
53 351 The authors have declared that no competing interests exist.  
54  
55  
56  
57  
58  
59  
60

## 352 **Authors' contributions**

353 Y.Z. and L.Z. participated in conception and design, and the analyses, and wrote the  
354 manuscript. Y-D.N. participated in data collection and performed the statistical analysis.  
355 L.Z. helped to draft the manuscript, reviewed the manuscript and made final changes. All  
356 authors have given their final approval of the version to be published.

## 357 **Acknowledgements**

358 This research is supported by the National Youth Natural Science Foundation of China,  
359 grant number (71603088).

## 360 **Disclosure**

361 No past publication history, no past presentation history

## 362 **Provenance and peer review**

363 Not commissioned; externally peer reviewed.

## 364 **Data sharing statement**

365 The anonymized dataset is available through the email of the corresponding author.

366

367

## **References:**

368 [1] Barnett ML, Hsu J, McWilliams JM. Patient Characteristics and Differences in Hospital Readmission  
369 Rates. JAMA INTERNAL MEDICINE. 2015;**175**(11):1803-1812.

370 [2] Sheingold SH, Zuckerman R, Shartz A. Understanding Medicare Hospital Readmission Rates And  
371 Differing Penalties Between Safety-Net And Other Hospitals. HEALTH AFFAIRS. 2016;**35**(1):124-131.

372 [3] Tsai TC, Joynt KE, Orav EJ, Gawande AA, Jha AK. Variation in Surgical-Readmission Rates and  
373 Quality of Hospital Care. NEW ENGLAND JOURNAL OF MEDICINE. 2013;**369**(12):1134-1142.

374 [4] Berry JG, Toomey SL, Zaslavsky AM, Jha AK, et al. Pediatric Readmission Prevalence and Variability  
375 Across Hospitals. JAMA-JOURNAL OF THE AMERICAN MEDICAL ASSOCIATION.  
376 2013;**309**(4):372-380.

377 [5] Zhang Y, Zhang L, Tang W, Sun X. Research on Global Budget on One Certain Disease in Multilevel  
378 Institutions: Integrated Care Orientation. INTERNATIONAL JOURNAL OF INTEGRATED CARE.  
379 2013;**13S**.



- 1  
2  
3 380 [6] Tsugawa Y, Jena AB, Figueroa JF, Orav EJ, Blumenthal DM, Jha AK. Comparison of Hospital  
4 381 Mortality and Readmission Rates for Medicare Patients Treated by Male vs Female Physicians. JAMA  
5 382 INTERNAL MEDICINE. 2017;**177**(2):206-213.
- 6 383 [7] Li X, Lu JP, Hu S, Cheng KK, et al. The primary health-care system in China. LANCET.  
7 384 2017;**390**(10112):2584-2594ELSEVIER SCIENCE INC.
- 8 385 [8] van Walraven C, Dhalla IA, Bell C, Etchells E, et al. Derivation and validation of an index to predict  
9 386 early death or unplanned readmission after discharge from hospital to the community. CANADIAN  
10 387 MEDICAL ASSOCIATION JOURNAL. 2010;**182**(6):551-557.
- 11 388 [9] Brown PH, Theoharides C. HEALTH-SEEKING BEHAVIOR AND HOSPITAL CHOICE IN  
12 389 CHINA'S NEW COOPERATIVE MEDICAL SYSTEM. HEALTH ECONOMICS. 2009;**18**:S47-S64.
- 13 390 [10] Campbell J. Inappropriate admissions: thoughts of patients and referring doctors. J R Soc Med.  
14 391 2001;**94**(12):628-6312001-12-01].
- 15 392 [11] Zhang YT, Tang WX, Zhang Y, Liu LL, Zhang L. Effects of integrated chronic care models on  
16 393 hypertension outcomes and spending: a multi-town clustered randomized trial in China. BMC PUBLIC  
17 394 HEALTH. 2017;**17**(244)BIOMED CENTRAL LTD.
- 18 395 [12] Zhang Y, Chen Y, Zhang X, Zhang L. Current level and determinants of inappropriate admissions to  
19 396 township hospitals under the new rural cooperative medical system in China: a cross-sectional study. BMC  
20 397 HEALTH SERVICES RESEARCH. 2014;**14**(649).
- 21 398 [13] Zhang Yan YTZL. Exploration of the hierarchical integration of rural medical institutions. Chinese  
22 399 Journal of Hospital Administration. 2016;**8**(32):614-617 'doi': 10.3760/cma.j.issn.1000-6672.2016.08.018[.  
23 400 [14] Ye T, Sun XW, Tang WX, Miao Y, Zhang YD, Zhang L. Effect of continuity of care on health-related  
24 401 quality of life in adult patients with hypertension: a cohort study in China. BMC HEALTH SERVICES  
25 402 RESEARCH. 2016;**16**(674)BIOMED CENTRAL LTD.
- 26 403 [15] NHaFPCoC. *2017 China Statistics Yearbook of Health and Family Planning*. Beijing: China union  
27 404 medical university press, 2017.
- 28 405 [16] Herrin J, St Andre J, Kenward K, Joshi MS, Audet AJ, Hines SC. Community Factors and Hospital  
29 406 Readmission Rates. HEALTH SERVICES RESEARCH. 2015;**50**(1):20-39.
- 30 407 [17] Longford NT. Improved approximations for multilevel models with binary responses. JOURNAL OF  
31 408 THE ROYAL STATISTICAL SOCIETY SERIES A-STATISTICS IN SOCIETY. 1997;**160**(3):593.
- 32 409 [18] Lim SL, Ong KCB, Chan YH, Loke WC, Ferguson M, Daniels L. Malnutrition and its impact on cost of  
33 410 hospitalization, length of stay, readmission and 3-year mortality. CLINICAL NUTRITION.  
34 411 2012;**31**(3):345-350.
- 35 412 [19] Calvillo-King L, Arnold D, Eubank KJ, Lo M, et al. Impact of Social Factors on Risk of Readmission or  
36 413 Mortality in Pneumonia and Heart Failure: Systematic Review. JOURNAL OF GENERAL INTERNAL  
37 414 MEDICINE. 2013;**28**(2):269-282.
- 38 415 [20] Kogan AC, Koons E, Enguidanos S. Investigating the Impact of Intervention Refusal on Hospital  
39 416 Readmission. AMERICAN JOURNAL OF MANAGED CARE. 2017;**23**(12):E394-E401.
- 40 417 [21] Ross JS, Chen J, Lin Z, Bueno H, et al. Recent National Trends in Readmission Rates After Heart  
41 418 Failure Hospitalization. CIRCULATION-HEART FAILURE. 2010;**3**(1):97-103.
- 42 419 [22] Hartl S, Luis Lopez-Campos J, Pozo-Rodriguez F, Castro-Acosta A, et al. Risk of death and  
43 420 readmission of hospital-admitted COPD exacerbations: European COPD Audit. EUROPEAN  
44 421 RESPIRATORY JOURNAL. 2016;**47**(1):113-121.
- 45 422 [23] Vo D, Zurakowski D, Faraoni D. Incidence and predictors of 30-day postoperative readmission in  
46 423 children. PEDIATRIC ANESTHESIA. 2018;**28**(1):63-70.

1  
2  
3 424  
4  
5

6 425 **Figure Legend**  
7

8 426 **Figure 1.** Map of Qianjiang district: geographic distribution  
9  
10  
11  
12  
13  
14  
15  
16  
17  
18  
19  
20  
21  
22  
23  
24  
25  
26  
27  
28  
29  
30  
31  
32  
33  
34  
35  
36  
37  
38  
39  
40  
41  
42  
43  
44  
45  
46  
47  
48  
49  
50  
51  
52  
53  
54  
55  
56  
57  
58  
59  
60

For peer review only

1  
2  
3  
4  
5  
6  
7  
8  
9  
10  
11  
12  
13  
14  
15  
16  
17  
18  
19  
20  
21  
22  
23  
24  
25  
26  
27  
28  
29  
30  
31  
32  
33  
34  
35  
36  
37  
38  
39  
40  
41  
42  
43  
44  
45  
46  
47  
48  
49  
50  
51  
52  
53  
54  
55  
56  
57  
58  
59  
60

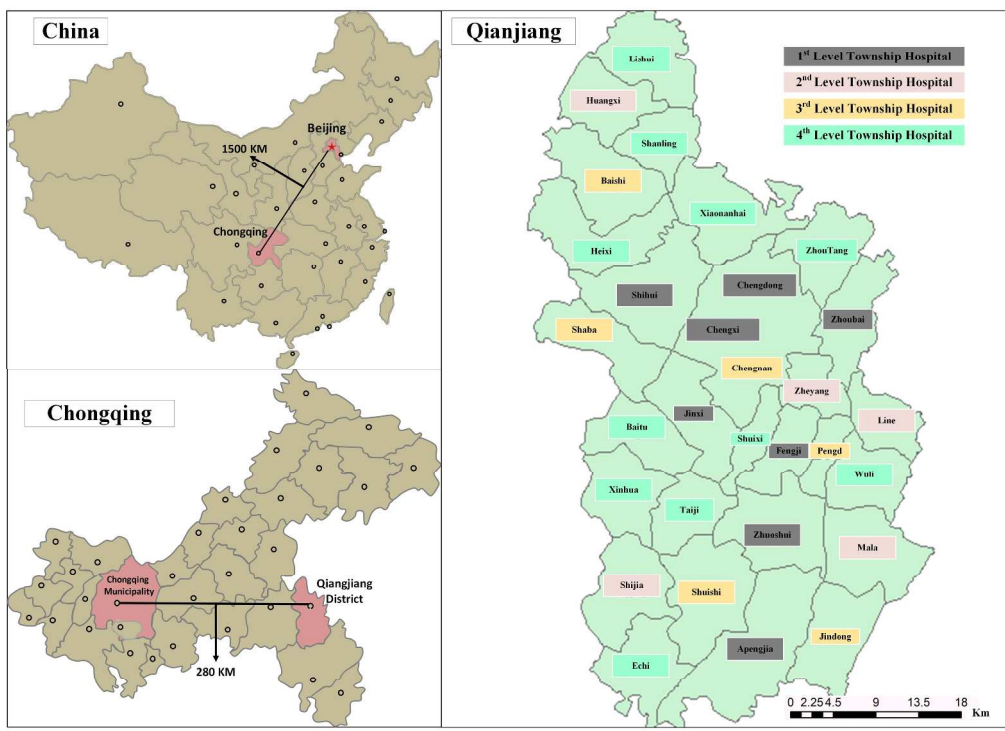

Map of Qianjiang distract: geographic distribution

136x113mm (600 x 600 DPI)

**STROBE 2007 (v4) Statement—Checklist of items that should be included in reports of *cross-sectional studies***

| Section/Topic                | Item # | Recommendation                                                                                                                                                                       | Reported on Line #   |
|------------------------------|--------|--------------------------------------------------------------------------------------------------------------------------------------------------------------------------------------|----------------------|
| <b>Title and abstract</b>    | 1      | (a) Indicate the study's design with a commonly used term in the title or the abstract                                                                                               | <b>Lines:1-2</b>     |
|                              |        | (b) Provide in the abstract an informative and balanced summary of what was done and what was found                                                                                  | <b>Lines:22-58</b>   |
| <b>Introduction</b>          |        |                                                                                                                                                                                      |                      |
| Background/rationale         | 2      | Explain the scientific background and rationale for the investigation being reported                                                                                                 | <b>Lines:60-126</b>  |
| Objectives                   | 3      | State specific objectives, including any prespecified hypotheses                                                                                                                     | <b>Lines:126-129</b> |
| <b>Methods</b>               |        |                                                                                                                                                                                      |                      |
| Study design                 | 4      | Present key elements of study design early in the paper                                                                                                                              | <b>Lines:152-154</b> |
| Setting                      | 5      | Describe the setting, locations, and relevant dates, including periods of recruitment, exposure, follow-up, and data collection                                                      | <b>Lines:131-143</b> |
| Participants                 | 6      | (a) Give the eligibility criteria, and the sources and methods of selection of participants                                                                                          | <b>Lines:145-147</b> |
| Variables                    | 7      | Clearly define all outcomes, exposures, predictors, potential confounders, and effect modifiers. Give diagnostic criteria, if applicable                                             | <b>Lines:148-152</b> |
| Data sources/<br>measurement | 8*     | For each variable of interest, give sources of data and details of methods of assessment (measurement). Describe comparability of assessment methods if there is more than one group | <b>Lines:152-166</b> |
| Bias                         | 9      | Describe any efforts to address potential sources of bias                                                                                                                            | <b>No</b>            |
| Study size                   | 10     | Explain how the study size was arrived at                                                                                                                                            | <b>Lines:167-168</b> |
| Quantitative variables       | 11     | Explain how quantitative variables were handled in the analyses. If applicable, describe which groupings were chosen and why                                                         | <b>Lines:169-177</b> |
| Statistical methods          | 12     | (a) Describe all statistical methods, including those used to control for confounding                                                                                                | <b>Lines:178-180</b> |
|                              |        | (b) Describe any methods used to examine subgroups and interactions                                                                                                                  | <b>Lines:180-190</b> |
|                              |        | (c) Explain how missing data were addressed                                                                                                                                          | <b>No</b>            |
|                              |        | (d) If applicable, describe analytical methods taking account of sampling strategy                                                                                                   | <b>No</b>            |
|                              |        | (e) Describe any sensitivity analyses                                                                                                                                                | <b>No</b>            |
| <b>Results</b>               |        |                                                                                                                                                                                      |                      |

|                          |     |                                                                                                                                                                                                              |                                   |
|--------------------------|-----|--------------------------------------------------------------------------------------------------------------------------------------------------------------------------------------------------------------|-----------------------------------|
| Participants             | 13* | (a) Report numbers of individuals at each stage of study—eg numbers potentially eligible, examined for eligibility, confirmed eligible, included in the study, completing follow-up, and analysed            | <b>Lines:197-204</b>              |
|                          |     | (b) Give reasons for non-participation at each stage                                                                                                                                                         | <b>No</b>                         |
|                          |     | (c) Consider use of a flow diagram                                                                                                                                                                           | <b>No</b>                         |
| Descriptive data         | 14* | (a) Give characteristics of study participants (eg demographic, clinical, social) and information on exposures and potential confounders                                                                     | <b>Lines:218-234</b>              |
|                          |     | (b) Indicate number of participants with missing data for each variable of interest                                                                                                                          | <b>No</b>                         |
| Outcome data             | 15* | Report numbers of outcome events or summary measures                                                                                                                                                         | <b>Lines:198-201</b>              |
| Main results             | 16  | (a) Give unadjusted estimates and, if applicable, confounder-adjusted estimates and their precision (eg, 95% confidence interval). Make clear which confounders were adjusted for and why they were included | <b>Lines:235-250</b>              |
|                          |     | (b) Report category boundaries when continuous variables were categorized                                                                                                                                    | <b>Lines:235-250</b>              |
|                          |     | (c) If relevant, consider translating estimates of relative risk into absolute risk for a meaningful time period                                                                                             | <b>No</b>                         |
| Other analyses           | 17  | Report other analyses done—eg analyses of subgroups and interactions, and sensitivity analyses                                                                                                               | <b>Lines:209-217</b>              |
| <b>Discussion</b>        |     |                                                                                                                                                                                                              |                                   |
| Key results              | 18  | Summarise key results with reference to study objectives                                                                                                                                                     | <b>Lines:252-271;<br/>332-338</b> |
| Limitations              | 19  | Discuss limitations of the study, taking into account sources of potential bias or imprecision. Discuss both direction and magnitude of any potential bias                                                   | <b>Lines:339-347</b>              |
| Interpretation           | 20  | Give a cautious overall interpretation of results considering objectives, limitations, multiplicity of analyses, results from similar studies, and other relevant evidence                                   | <b>Lines:272-328</b>              |
| Generalisability         | 21  | Discuss the generalisability (external validity) of the study results                                                                                                                                        | <b>Lines:329-331</b>              |
| <b>Other information</b> |     |                                                                                                                                                                                                              |                                   |
| Funding                  | 22  | Give the source of funding and the role of the funders for the present study and, if applicable, for the original study on which the present article is based                                                | <b>Lines:356-357</b>              |

\*Give information separately for cases and controls in case-control studies and, if applicable, for exposed and unexposed groups in cohort and cross-sectional studies.

**Note:** An Explanation and Elaboration article discusses each checklist item and gives methodological background and published examples of transparent reporting. The STROBE checklist is best used in conjunction with this article (freely available on the Web sites of PLoS Medicine at <http://www.plosmedicine.org/>, Annals of Internal Medicine at <http://www.annals.org/>, and Epidemiology at <http://www.epidem.com/>). Information on the STROBE Initiative is available at [www.strobe-statement.org](http://www.strobe-statement.org).

# BMJ Open

## Determinants of Patient Choice for Hospital Readmission after Township Hospitalisation: A Population-Based Retrospective Study in China

|                                 |                                                                                                                                                                                                                                                                                |
|---------------------------------|--------------------------------------------------------------------------------------------------------------------------------------------------------------------------------------------------------------------------------------------------------------------------------|
| Journal:                        | <i>BMJ Open</i>                                                                                                                                                                                                                                                                |
| Manuscript ID                   | bmjopen-2018-021516.R3                                                                                                                                                                                                                                                         |
| Article Type:                   | Research                                                                                                                                                                                                                                                                       |
| Date Submitted by the Author:   | 22-Jun-2018                                                                                                                                                                                                                                                                    |
| Complete List of Authors:       | Zhang, Yan; Huazhong University of Science and Technology Tongji Medical College, School of Medicine and Health Management<br>Yadong, Niu; Huazhong University of Science and Technology<br>ZHANG, LIANG; Huazhong University of Science and Technology Tongji Medical College |
| <b>Primary Subject Heading</b>: | Health services research                                                                                                                                                                                                                                                       |
| Secondary Subject Heading:      | Health services research, Health policy, Medical management                                                                                                                                                                                                                    |
| Keywords:                       | readmission, choice, county hospital, patient flow, rural China                                                                                                                                                                                                                |
|                                 |                                                                                                                                                                                                                                                                                |

SCHOLARONE™  
Manuscripts

1  
2  
3  
4 **1 Determinants of Patient Choice for Hospital Readmission after Township**  
5  
6 **2 Hospitalisation: A Population-Based Retrospective Study in China**  
7  
8  
9

10  
11  
12 4 Yan Zhang<sup>1,2</sup>, Yadong Niu<sup>1,2</sup>, Liang Zhang<sup>1,2</sup> §  
13  
14  
15

16  
17 <sup>1</sup> School of Medicine and Health Management, Tongji Medical College, Huazhong  
18  
19 University of Science and Technology, Wuhan, Hubei, 430030, China  
20  
21

22 <sup>2</sup> Research Centre for Rural Health Service, Key Research Institute of Humanities & Social  
23  
24 Sciences of Hubei Provincial Department of Education, Wuhan, Hubei, 430030, China  
25  
26

27  
28  
29 **11 Email addresses:**  
30

31 12 Y.Z. Yan Zhang Ph.D. yanzhang@hust.edu.cn  
32  
33

34 13 Y-D. N. Yadong Niu M.D. nyadong@126.com  
35

36 14 L.Z. Liang Zhang M.D. zhangliang@mails.tjmu.edu.cn  
37  
38

39  
40  
41 **16 §Corresponding author:**  
42

43  
44 Liang Zhang, zhangliang@mails.tjmu.edu.cn  
45  
46

47  
48  
49 **19 Word Count:** 3259  
50  
51

52  
53  
54  
55  
56  
57  
58  
59  
60

## 21 Abstract

22 **Objective:** The lack of coordinated and appropriate healthcare across sectors has produced  
23 more patients for county hospitals in China. This study examined differences in patient  
24 choice between township and county hospitals for readmission after a first township  
25 hospitalisation, and the determinants that influenced this choice.

26 **Design:** A retrospective study of readmissions across hospitals after a first admission in  
27 township hospital. A township–township inpatient (TT) group and a township–county  
28 inpatient (TC) group were compared. A two-level logistic regression model was used to  
29 examine the determinants of choice for hospital readmission.

30 **Setting:** Data were drawn from a population-based health utilisation database for  
31 Qianjiang District, China, from 1 January 2008 to 31 December 2013.

32 **Participants:** This study focused on readmitted patients whose first admission was in a  
33 township hospital. Readmission cases were identified as the same diagnosis (International  
34 Classification of Diseases, tenth revision) in a subsequent hospitalisation within 30 days. In  
35 total, 6,764 readmissions had first admissions in township hospitals.

36 **Primary outcome measures:** Patient choice for hospital readmission after a first township  
37 hospitalisation.

38 **Results:** The TT group accounted for 62.5% (4,225) and the TC group for 37.5% (2,539)  
39 of readmissions in 6 years, and the proportion of TC readmissions in total inpatients  
40 increased from 1.66% to 1.89%. Readmission rates varied among towns ( $P < 0.001$ ).  
41 Differences between the TC and TT groups included: length of stay (LOS) of first  
42 admission (6.96 days vs. 9.23 days), average interval between admissions (6.03 days vs.



1  
2  
3  
4 43 14.95 days) and disease category. Admission year, age, travel time to county hospital,  
5  
6 44 interval between admissions, first admission LOS and disease category were determinants  
7  
8 45 of choice for hospital readmission.  
9

10  
11 46 **Conclusions:** Patients whose first admission was in a township hospital were more likely  
12  
13 47 to be readmitted to a county hospital. A combination of first LOS and interval between  
14  
15 48 admissions may be an effective identification index for township–county readmission.  
16  
17

18 49 **Keywords:** readmission, choice, county hospital, patient flow, rural China  
19  
20

## 21 50 **Strengths and limitations**

- 22 51 • This is the first study to focus on township–county readmission, a feature of  
23  
24 52 hospitalisation in rural China.
- 25  
26 53 • Population-level data on readmission is seldom reported across hospitals of different  
27  
28 54 levels.
- 29  
30 55 • Programming techniques, including Microsoft Excel formulas and case processing  
31  
32 56 technologies, were used in the data processing.
- 33  
34 57 • A two-level logistic regression model was used to consider aggregation at the town level.
- 35  
36 58 • Hospitalisation information, geographical factors, interval status and disease were all  
37  
38 59 entered into the logistic regression model, but some individual factors were missing.

## 39 60 **Background**

40  
41 61 Readmission refers to an episode where an inpatient is readmitted for the same disease  
42  
43 62 with 30 days.<sup>[1, 2]</sup> In most studies, readmission findings reflect that inpatient care did not  
44  
45 63 meet patient requirements, with readmission rates used as an evaluation index for  
46  
47

1  
2  
3  
4 64 hospitalisation quality.<sup>[3]</sup> Readmission usually occurs in the same hospital, but sometimes  
5  
6 65 occurs across hospitals because of deterioration of a patient's disease.<sup>[4]</sup> However, in rural  
7  
8 66 China, multilevel institutional readmission is a common and important healthcare  
9  
10  
11 67 utilisation. This reflects defects of China's healthcare delivery system, rather than  
12  
13 68 hospitalisation quality, especially in township–county (TC) readmissions. TC readmission  
14  
15  
16 69 is a health-seeking behaviour in which inpatients seek healthcare services in a township  
17  
18 70 hospital first, and then in a county hospital, whether planned or unplanned, voluntarily or  
19  
20  
21 71 passively. TC readmission is frequent in rural China, and currently accounts for  
22  
23 72 approximately 2.0% of all inpatient services.<sup>[5]</sup> TC readmission usually occurs following  
24  
25  
26 73 doctor recommendation/referral or by individual patient choice.  
27  
28 74 TC readmission recommended by doctors occurs when a township doctor has an inpatient  
29  
30  
31 75 admission that they cannot fully treat or completely cure,<sup>[6]</sup> consequently, that patient is  
32  
33 76 referred directly to a county hospital or advised to go to a county hospital for subsequent  
34  
35  
36 77 admission.<sup>[6]</sup> This situation results from the three-tier healthcare delivery system in rural  
37  
38 78 China, where care is provided in a village–town–county healthcare delivery system, and all  
39  
40  
41 79 hospital services are supplied by township and county hospitals.<sup>[7]</sup> In general, the higher  
42  
43 80 the level of the institution, the stronger the service capability, the greater the distance a  
44  
45  
46 81 patient must travel and the higher the medical cost. Township hospitals bear the  
47  
48 82 responsibilities of transferring patients, taking care of inpatients with general illnesses and  
49  
50  
51 83 advising patients with severe diseases (that are beyond their capacity) to seek admission at  
52  
53 84 county hospitals.<sup>[8]</sup> Township hospital doctors sometimes receive patients whose diseases  
54  
55  
56 85 are beyond their capacity to manage (e.g. because of their inaccurate judgment, or

1  
2  
3  
4 86 deterioration of the disease), meaning TC readmission may be unavoidable.  
5  
6  
7 87 TC readmission from individual choice may occur when patients who should be readmitted  
8  
9 88 to township hospitals choose to be admitted to county hospitals for personal reasons.<sup>[9]</sup>  
10  
11 89 Some readmissions are influenced by quality concerns with township hospitals, poor  
12  
13  
14 90 patient compliance on medicine and after-care or from a normal disease recurrence.  
15  
16 91 However, patients often do not acknowledge the real readmission reason and transfer  
17  
18  
19 92 responsibility for readmission to the township hospital doctor (e.g. considering readmission  
20  
21 93 as a result of failed treatment) and consequently decide to be readmitted to a county  
22  
23  
24 94 hospital. This situation often represents inappropriate readmission.<sup>[10]</sup>  
25  
26  
27 95 From the patients' perspective, no order or limitation on patient choice exists. In addition,  
28  
29 96 no general practitioners or consultants are available in rural China. Therefore, residents  
30  
31 97 freely choose hospitals and service types, mainly depending on their judgment regarding  
32  
33  
34 98 their disease and understanding of hospitals. If a patient chooses a higher-level institution  
35  
36  
37 99 than necessary, they pay more; if they choose a lower-level institution than necessary they  
38  
39 100 would be referred or readmitted. Therefore, the cost of an incorrect decision is borne by the  
40  
41 101 patient. To guarantee patient interests regarding TC readmission, the three-tier healthcare  
42  
43  
44 102 delivery system requires different-level hospitals to cooperate in providing continuous  
45  
46 103 healthcare services. However, in reality, communication among township and county  
47  
48  
49 104 professional providers is limited, and there is virtually no document sharing or interaction  
50  
51 105 among providers across the three tiers.<sup>[11]</sup> County hospital doctors do not deliver  
52  
53  
54 106 continued care for readmitted patients because of income incentives and risk aversion, and  
55  
56 107 patients readmitted to a county hospital usually receive new treatment.<sup>[12]</sup> Furthermore,

1  
2  
3  
4 108 compared with patients admitted directly to county hospitals, readmitted patients spend  
5  
6 109 more time, pay more costs and may even miss proper treatments. As a result, when  
7  
8 110 subsequent illnesses occur and patients are unable to judge the severity of their illness, they  
9  
10 111 tend to choose admission in a county hospital, taking excess economic risk to avoid delay.  
11  
12  
13 112 Some studies have defined TC readmission as failed treatment from the patients'  
14  
15 113 perspective, and shown that the TC readmission experience can influence a patient's later  
16  
17 114 choice of hospital.<sup>[13, 14]</sup> Inpatients may be more likely to seek care in county hospitals  
18  
19 115 compared with township hospitals; a phenomenon that is already happening. The annual  
20  
21 116 growth rate of inpatients in county hospitals from 2010 to 2016 was 6.75%, whereas that of  
22  
23 117 township hospital inpatients was 0.63% in rural China.<sup>[15]</sup>  
24  
25  
26  
27  
28 118 As noted, TC readmission from individual choice may be an inappropriate level of  
29  
30 119 admission, and TC readmission recommended by doctors can also result in inappropriate  
31  
32 120 level admission for subsequent hospitalisation. Inappropriate level admission means  
33  
34 121 patients seek healthcare in a higher-level hospital than necessary. This may result from  
35  
36 122 patients' intentional institution selection and distrust of the capability of township hospitals;  
37  
38 123 such patients prefer to spend more money on healthcare to avoid the risk of needing  
39  
40 124 referral. Inappropriate level admission is a major form of excess service demand,<sup>[12]</sup> and  
41  
42 125 an important determinant of increasing health expenditure that leads to significant waste.  
43  
44  
45  
46  
47 126 In this context, identifying the forms and determinants of TC readmission will help to  
48  
49 127 improve the New Rural Cooperative Medical System (NRCMS). This study focused on  
50  
51 128 choices for hospital readmission after a first admission as an inpatient in a township  
52  
53 129 hospital, and identified the determinants of choice for hospital readmission.  
54  
55  
56  
57  
58  
59  
60

## 130 **Methods**

### 131 **Study setting**

132 Qianjiang District was designated as the sample area through cluster sampling. This is a  
133 typical rural area located in Chongqing, which is the largest municipality in southwest  
134 China. Qianjiang has a per capita GDP of \$7,515 in 2016, which is below the average GDP  
135 in China. The resident population is 550,000 people; all residents are covered under the  
136 NRCMS, and are eligible to receive reimbursement for inpatient care. Qianjiang District  
137 has two county hospitals and 30 township hospitals. The township hospitals are divided  
138 into four levels according to their scale and service quantity by Qianjiang Health Bureau  
139 (Fig. 1). First-level township hospitals are allocated more than 30 beds and may perform  
140 abdominal operations; these hospitals had more than 1,200 discharged patients in 2013.  
141 Second-level township hospitals cannot perform abdominal operations of the same scale as  
142 first-level township hospitals. Third-level township hospitals have fewer than 30 beds and  
143 around 600~1,200 discharged patients. All other township hospitals belong to the fourth  
144 level.

1  
2  
3  
4 145 **Data source**  
5  
6

7 146 This study was based on the NRCMS inpatient database in Qianjiang District, which  
8  
9 147 contains all inpatient data for the population. In this database, a case refers to a single  
10  
11  
12 148 hospitalisation in a county or township hospitals.  
13

14  
15 149 **Data processing**  
16

17  
18 150 We focused on individuals who had been discharged from participating hospitals.  
19  
20 151 Readmission cases were identified as having the same diagnosis in subsequent  
21  
22 152 hospitalisations between county and township hospitals or township hospitals and township  
23  
24 153 hospitals within 30 days. Given our population-based retrospective design, we compared  
25  
26  
27 154 the differences between township–township readmitted inpatients (TT group) and TC  
28  
29 155 readmitted inpatients (TC group). Samples were entered into MS Excel 2010, based on the  
30  
31  
32 156 NRCMS database from 1 January 2008 to 31 December 2013. First, cases that shared the  
33  
34 157 same patient identifier and the same disease codes were sorted in chronological order.  
35  
36  
37 158 Second, we calculated the interval between admissions in two adjacent cases for the same  
38  
39 159 inpatient for the same disease; if the interval between admissions was less than 31 days, the  
40  
41  
42 160 patient was marked as a readmission patient. For example, if the first admission occurred  
43  
44 161 in a township hospital and the second occurred in county hospital, the two cases would be  
45  
46  
47 162 merged as one case and marked as a TC readmission, and the patient marked as TC patient.  
48  
49 163 TT patients were identified in a similar manner. Finally, all TC and TT cases were  
50  
51  
52 164 extracted into a new database. As diagnosis of a disease may change among different  
53  
54  
55 165 doctors, in different institutions or at different times, we adjusted the original International  
56  
57  
58  
59  
60

1  
2  
3  
4 166 Classification of Diseases, tenth revision disease code into a broader code (e.g. chronic  
5  
6 167 obstructive pulmonary disease was adjusted from J44.900 to J44), which may improve  
7  
8 168 accuracy in identifying readmitted patients. After screening, there were 6,764 readmitted  
9  
10  
11 169 patients from 2008–2013 in the sample.

12  
13 170 The main programming techniques included Microsoft Excel formulas (e.g. COUNTIF,  
14  
15 171 SUMPRODUCT, LOOKUP and IF) and case processing technologies (e.g. split columns  
16  
17  
18 172 and removal of duplicates).

19  
20 173 Sociological characteristics were collected to build a final database, including: gender; age;  
21  
22  
23 174 travel time from home to county hospital; first inpatient information including length of  
24  
25 175 stay (LOS), expenses, disease category, capacity of the township hospital, interval between  
26  
27  
28 176 admissions and readmitted hospital choice.<sup>[16]</sup> The distance and travel time to the county  
29  
30 177 hospital for all readmitted patients were captured individually by Google Maps. Because  
31  
32  
33 178 traffic conditions are different in different towns (e.g. national roads, provincial roads or  
34  
35 179 county roads), both the distance and travel time were captured.

### 36 37 38 180 **Data obtained and Statistical analysis**

39  
40  
41 181 The characteristics of patients' choices for hospital readmission were compared using  
42  
43  
44 182 t-tests and chi-square tests in IBM SPSS Statistics 22.0. The treatment capacity of  
45  
46 183 township hospitals and the travel time to a county hospital from different towns have  
47  
48  
49 184 differential impacts on the observed predictors. Therefore, we assumed that the obtained  
50  
51 185 data indicated a hierarchical structure, and the 6,764 records could be aggregated by town  
52  
53  
54 186 level. The determinants of choice for hospital readmission were examined using multilevel  
55  
56 187 binomial logistic regression analysis using MLwiN 2.30, which was developed by the

1  
2  
3  
4 188 University of Bristol, UK.<sup>[17]</sup> Patients were identified as level 1 and town as level 2. The  
5  
6 189 regression model was as follows.

7  
8  
9  
10 190 
$$\log it(\pi_{ij}) = \beta_0 \text{cons} + \beta_1 \text{Admitted Year}_{ij} + \beta_2 \text{Gender}_{ij} + \beta_3 \text{Age}_{ij} + \beta_4 \text{Distance}_{ij} + \beta_5 \text{Time}_{ij}$$
  
11 
$$+ \beta_6 \text{Capacity}_{ij} + \beta_7 \text{1st LOS}_{ij} + \beta_8 \text{1st Expend}_{ij} + \beta_9 \text{Interval}_{ij} + \text{More14}_{ij}$$

12 191 
$$\beta_{0j} = \beta_0 + u_{0j}$$

13  
14 192  $\beta_i$  refers to the fixed effects parameter, and  $u_{0j}$  refers to the random effects of level 2.

### 15 16 17 18 193 **Patient and Public Involvement**

19  
20 194 No patients or public were involved in this research.

### 21 22 23 24 195 **Ethical approval**

25  
26 196 The study protocol conformed to the guidelines of the Ethics Committee of the Tongji  
27  
28 197 Medical College of Huazhong University of Science and Technology. The protocol was  
29  
30 198 registered in the Chinese Clinical Trial Registry (ChiCTR-OOR-14005563). Patient  
31  
32 199 information was anonymised and de-identified before analysis.

## 33 34 35 36 37 200 **Results**

### 38 39 40 41 201 **Choices for hospital readmission after a first township hospitalisation**

42  
43 202 Among 271,405 discharged admissions in 2008–2013, there were 6,764 readmissions after  
44  
45 203 a first hospitalisation in a township hospital. The TT group accounted for 62.5% (4,225) of  
46  
47 204 all readmissions and the TC group for 37.5% (2,539) (Table 1). The number of  
48  
49 205 readmissions increased sharply, whereas the proportion of readmissions in the total  
50  
51 206 inpatients averaging around 5%. The TC group increased from 1.66% in 2008 to 1.89% in  
52  
53  
54  
55 207 2013, with the annual growth rate of the TC group being 28.55%, which was higher than



208 that of the TT group (22.38%).

209 **Table 1. Number of readmissions each year in Qianjiang district (2008–2013)**

| Year         | All inpatients | Readmissions* n (%) | Choice for hospital readmission** |                     | P***   |
|--------------|----------------|---------------------|-----------------------------------|---------------------|--------|
|              |                |                     | TT group n (%)                    | TC group n (%)      |        |
| 2008         | 21,823         | 524 (4.80)          | 342 (3.14)                        | 182 (1.66)          | <0.001 |
| 2009         | 34,240         | 1,076 (6.27)        | 724 (4.23)                        | 352 (2.04)          |        |
| 2010         | 35,866         | 942 (5.25)          | 608 (3.39)                        | 334 (1.86)          |        |
| 2011         | 50,616         | 1,260 (4.98)        | 797 (3.16)                        | 463 (1.82)          |        |
| 2012         | 61,467         | 1,384 (4.50)        | 815 (2.64)                        | 569 (1.86)          |        |
| 2013         | 67,392         | 1,578 (4.67)        | 939 (2.78)                        | 639 (1.89)          |        |
| <b>Total</b> | <b>271,405</b> | <b>6,764 (4.98)</b> | <b>4,225 (3.11)</b>               | <b>2,539 (1.87)</b> |        |

210 \* Readmission refers to readmissions whose first admission was in a township hospital.

211 \*\* One readmission includes two admissions.

212 \*\*\* Pearson's chi-square test.

213 Readmission varied among towns (Table 2). Chengnan town had the lowest overall

214 readmission ratio (2.95%) and the lowest TT readmission ratio (1.52%) of the 30 towns.

215 Heixi town had the lowest TC readmission ratio (1.30%), Shijia town had the highest TC

216 readmission ratio (2.86%) and Jindong town had the highest TT readmission (5.49%) and

217 overall readmission (6.96%) ratios.

218 **Table 2. Number of readmissions Qianjiang district (2008–2013), by town**

| Town         | All inpatients | Readmissions* n (%) | Choice for hospital readmission** |                    | P***   |
|--------------|----------------|---------------------|-----------------------------------|--------------------|--------|
|              |                |                     | TT group n (%)                    | TC group n (%)     |        |
| Chengnan     | 11,716         | 173 (2.95)          | 89 (1.52)                         | 84 (1.43)          | <0.001 |
| Heixi        | 9,073          | 137 (3.02)          | 78 (1.72)                         | 53 (1.30)          |        |
| Shaba        | 8,778          | 152 (3.20)          | 81 (1.58)                         | 71 (1.62)          |        |
| ~            | ~              | ~                   | ~                                 | ~                  |        |
| Shijia       | 8,605          | 223 (5.18)          | 100 (2.32)                        | 123 (2.86)         |        |
| Jindong      | 6,007          | 209 (6.96)          | 165 (5.49)                        | 44 (1.47)          |        |
| <b>Total</b> | <b>271,405</b> | <b>6,764 (4.98)</b> | <b>4225 (3.11)</b>                | <b>2539 (1.87)</b> |        |

219 \* Readmission refers to readmissions whose first admission was in a township hospital.

220 \*\* One readmission includes two admissions.

221 \*\*\* Pearson's chi-square test.

## 222 Characteristics of readmitted patients between TT and TC groups

223 Table 3 shows the characteristics of readmitted patients from 2008–2013. Male patients  
 224 accounted for 48.7% of the TC group, which was a higher rate than in the TT group (41.9%,  
 225  $P < 0.001$ ). Readmission choices varied in different age groups ( $P < 0.001$ ), with over half  
 226 (57.9%) of patients in the TC group aged 40–59 years. The most common interval between  
 227 admissions in the TC group was shorter than 3 days (61.1%), whereas that in the TT group  
 228 was 16–30 days (50.6%,  $P < 0.001$ ). The average interval between admissions in the TC  
 229 group was lower than that in TT group (6.03 days vs. 14.95 days). Similar patterns were  
 230 observed in the average LOS of first inpatient admissions (6.96 days vs. 9.23 days) and  
 231 travel time to county hospital (59.73 minutes vs. 61.79 minutes). However, an opposite  
 232 trend was observed in terms of expenses of first inpatient admission (¥831.35 vs. ¥791.01).  
 233 The TC group mostly had respiratory (37.7%) and digestive diseases (20.3%). There were  
 234 no significant differences in the distance to a county hospital and the township hospital  
 235 capacity between the TT and TC groups.

236 **Table 3. Distribution of characteristics of readmitted patients ( $n = 6,764$ )**

| Variable            | All n (%)    | Choice for hospital readmission |                | <i>P</i> |
|---------------------|--------------|---------------------------------|----------------|----------|
|                     |              | TT group n (%)                  | TC group n (%) |          |
| All                 | 6,764        | 4,225 (62.5)                    | 2,539 (37.5)   |          |
| Gender              |              |                                 |                | <0.001*  |
| Male                | 3,006 (44.4) | 1,769 (41.9)                    | 1,237 (48.7)   |          |
| Female              | 3,758 (55.6) | 2,456 (58.1)                    | 1,302 (51.3)   |          |
| Age, years          |              |                                 |                |          |
| Mean (SD)           | 48.18 (0.27) | 46.94 (0.35)                    | 50.25 (0.43)   | <0.001** |
| Less than 20        | 950 (22.0)   | 629 (22.9)                      | 321 (20.5)     | <0.001*  |
| 20–39               | 1,215 (28.2) | 877 (31.9)                      | 338 (21.6)     |          |
| 40–59               | 2,045 (47.4) | 1,192 (43.4)                    | 853 (54.4)     |          |
| More than 59        | 103 (2.4)    | 48 (1.7)                        | 55 (3.5)       |          |
| Distance to CH (km) |              |                                 |                |          |

|                                   |                 |               |                 |          |
|-----------------------------------|-----------------|---------------|-----------------|----------|
| Mean (SD)                         | 36.29 (0.27)    | 35.99(0.34)   | 36.78(0.42)     | 0.15**   |
| Time to CH (min)                  |                 |               |                 |          |
| Mean (SD)                         | 60.51 (0.45)    | 59.73(0.57)   | 61.79(0.72)     | 0.03**   |
| Capacity of TH                    |                 |               |                 |          |
|                                   |                 |               |                 | 0.53*    |
| 1st level (Strong)                | 3,076 (45.5)    | 1918(45.4)    | 1158(45.6)      |          |
| 2nd level (Better)                | 1,315 (19.4)    | 802(19)       | 513(20.2)       |          |
| 3rd level (General)               | 9,35 (13.8)     | 591(14)       | 344(13.5)       |          |
| 4th level (Weak)                  | 1,438 (21.3)    | 914(21.6)     | 524(20.6)       |          |
| 1st LOS (day)                     |                 |               |                 |          |
| Mean (SD))                        | 8.38 (0.12)     | 9.23(0.16)    | 6.96(0.16)      | <0.001** |
| 1st Expense (RMB)                 |                 |               |                 |          |
| Mean (SD)                         | 816.21 (7.94)   | 831.35(9.95)  | 791.01(13.14)   | 0.01**   |
| 2nd LOS (day)                     |                 |               |                 |          |
| Mean (SD)                         | 10.24 (0.13)    | 10.03(0.16)   | 10.58(0.22)     | 0.04**   |
| 2nd Expense (RMB)                 |                 |               |                 |          |
| Mean (SD)                         | 2215.49 (45.46) | 862.99(12.77) | 4466.09(104.99) | <0.001** |
| Interval between admissions (day) |                 |               |                 |          |
| Mean (SD)                         | 11.6 (0.12)     | 14.95(0.14)   | 6.03(0.17)      | <0.001** |
| ~3                                | 2,133(31.5)     | 582(13.8)     | 1551(61.1)      | <0.001*  |
| 3-7                               | 761 (11.3)      | 517(12.2)     | 244(9.6)        |          |
| 7-15                              | 1,328 (19.6)    | 987(23.4)     | 341(13.4)       |          |
| 16-31                             | 2,542 (37.6)    | 2139(50.6)    | 403(15.9)       |          |
| Disease category                  |                 |               |                 |          |
|                                   |                 |               |                 | <0.001*  |
| Cancer                            | 178 (2.6)       | 109(2.6)      | 69(2.7)         |          |
| ENT disease                       | 338 (5.0)       | 243(5.8)      | 95(3.7)         |          |
| Respiratory disease               | 2,673 (39.5)    | 1715(40.6)    | 958(37.7)       |          |
| Circulatory disease               | 450 (6.7)       | 224(5.3)      | 226(8.9)        |          |
| Digestive disease                 | 984 (14.5)      | 469(11.1)     | 515(20.3)       |          |
| Urinary disease                   | 269 (4.0)       | 89(2.1)       | 180(7.1)        |          |
| Haematological disorders          | 19 (0.2)        | 2(0.1)        | 17(0.7)         |          |
| Bones and muscles                 | 425 (6.3)       | 218(5.2)      | 207(8.2)        |          |
| Obstetrics and gynaecology        | 1,213 (17.9)    | 1037(24.5)    | 176(6.9)        |          |

237 \* Pearson's chi-square test.

238 \*\* ANOVA.

## 239 **Determinants of choice for hospital readmission after township hospitalisation**

240 The two-level logistic regression is illustrated by the level 2 variance of the zero model.

241 This was statistically significant ( $\chi^2 = 63.524$ ,  $P < 0.001$ ), with aggregation of information  
 242 at the town level. The specific results of the explanatory variables to fit the two variance  
 243 component model are shown in Table 4. The major determinants of the choice for hospital  
 244 readmission after a first township hospitalisation were admission year, age, travel time to a  
 245 county hospital, interval between admissions, first LOS and disease category. If other  
 246 factors remained constant, patients in the group aged 40–59 years were more likely to be  
 247 readmitted to a county hospital (odds ratio [OR] = 1.32). Other factors associated with TC  
 248 readmission were a shorter travel time to county hospital, shorter LOS, shorter interval  
 249 between admissions, urinary tract diseases (OR = 2.68) or first admission/readmission in a  
 250 more recent year. The ratio of patients with obstetric or gynaecological diseases readmitted  
 251 to a county hospital was much lower than that of patients with cancer (OR = 0.40).

252 **Table 4. Multilevel logistic regression model for hospital readmission choice**

|                                      | Parameter estimate | Standard error | $\chi^2$ | P      | Adjusted OR |
|--------------------------------------|--------------------|----------------|----------|--------|-------------|
| <b>Fixed Part:</b>                   |                    |                |          |        |             |
| Constant                             | -271.3             | 41.231         | 49.524   | <0.001 |             |
| Admitted year*                       | 0.136              | 0.027          | 47.934   | <0.001 | 1.14        |
| Gender(reference: female)            |                    |                |          |        |             |
| Male                                 | -0.003             | 0.066          | 0.003    | 0.955  | 1.00        |
| Age (reference: less than 20)        |                    |                |          |        |             |
| 20–39                                | -0.062             | 0.123          | 0.250    | 0.617  | 0.94        |
| 40–59                                | 0.294              | 0.111          | 6.870    | 0.008  | 1.32        |
| More than 59                         | 0.034              | 0.102          | 0.116    | 0.735  | 1.03        |
| Travel time (min)                    | -0.023             | 0.013          | 17.468   | <0.001 | 0.97        |
| Capacity of TH**                     | -0.017             | 0.035          | 0.204    | 0.658  | 0.98        |
| 1st LOS (day)                        | -0.036             | 0.006          | 53.177   | <0.001 | 0.96        |
| 1st Expends (RMB)                    | 0.001              | 0.001          | 1.323    | 0.255  | 1.00        |
| 2nd LOS (day)                        | -0.002             | 0.003          | 0.213    | 0.644  | 0.99        |
| Interval between admissions (day)    | -0.110             | 0.004          | 895.49   | <0.001 | 0.90        |
| Disease category (reference: cancer) |                    |                |          |        |             |

|                            |        |       |        |        |       |
|----------------------------|--------|-------|--------|--------|-------|
| ENT                        | -0.406 | 0.263 | 2.462  | 0.131  | 0.67  |
| Respiratory disease        | -0.256 | 0.217 | 1.327  | 0.251  | 0.78  |
| Circulatory disease        | 0.512  | 0.256 | 4.627  | 0.028  | 1.64  |
| Digestive disease          | 0.553  | 0.227 | 6.217  | 0.013  | 1.74  |
| Urinary disease            | 0.982  | 0.264 | 13.950 | <0.001 | 2.68  |
| Haematological disorders   | 2.310  | 0.853 | 7.641  | 0.004  | 10.03 |
| Bones and muscles          | 0.245  | 0.242 | 1.066  | 0.301  | 1.28  |
| Obstetrics and gynaecology | -0.947 | 0.238 | 15.874 | <0.001 | 0.40  |
| Else                       | -0.132 | 0.265 | 0.251  | 0.617  | 0.88  |
| <b>Random Part:</b>        |        |       |        |        |       |
| Town variance              | 0.153  | 0.036 | 17.921 | <0.001 | —     |
| Patient scale parameter    | 1      | 0.00  | —      | —      | —     |

253 \* TC shows a stable increase in recent years, so admitted year was included in the analysis by order of ranked data.

254 \*\* Capacity of township hospital included in the analysis by order of ranked data.

## 255 Discussion

### 256 Choice for hospital readmission and aggregation

257 Readmission is common and unavoidable, and can often be attributed to technology and  
 258 management problems.<sup>[18]</sup> TC readmission accounted for 1.89% of all hospitalisation  
 259 cases in Qianjiang in 2013, showing steady growth from 2008 (1.66%). In the study period,  
 260 TC readmission accounted for more than one-third of readmission cases that had a first  
 261 inpatient admission in a township hospital, which is common in rural China. However, as  
 262 mentioned, TC readmission (either through doctor referral/recommendation or the patient's  
 263 choice) often reflects an inefficient use of health services for patients; TC readmission  
 264 patients may experience disease delays or cost waste, which may result in patient  
 265 dissatisfaction regarding the township hospital. A point that needs to be noted here is the  
 266 uncertainty about whether TT patients had been readmitted to a county hospital three or  
 267 more times, which has been reported as a real scenario.

1  
2  
3  
4 268 The two-level logistic regression analysis showed a hierarchy in the inpatient data (town–  
5  
6 269 patients). Patients' choice of hospital readmission was clustered at the town level. In other  
7  
8 270 words, 6,764 readmitted patients were non-independent, and the choices for hospital  
9  
10 271 readmission in same town tended to be approximated. The incidence differed in different  
11  
12 272 towns, from 2.95% (Chengnan) to 6.96% (Jindong). The 30 towns in the study area also  
13  
14 273 differed in terms of township hospital, social customs and geographic location. Different  
15  
16 274 township hospitals also have different service concepts and medical capabilities, which  
17  
18 275 might have affected patients' hospital readmission choice.  
19  
20  
21  
22  
23

#### 24 **Determinants of choice for hospital readmission**

25  
26 277 Logistic regression analysis showed that patient gender, capacity of township hospital and  
27  
28 278 first admission expenses did not have significant effects on the choice of hospital for  
29  
30 279 readmission. Readmission choice was affected by age, travel time to a county hospital,  
31  
32 280 interval between admissions, LOS in the first admission and disease category. Although the  
33  
34 281 towns in which patients lived affected their choice of hospital for readmission, the capacity  
35  
36 282 of township hospitals had no significant effects; therefore, the town-based effects could be  
37  
38 283 speculatively attributed to social customs and geographic location, which is consistent with  
39  
40 284 a previous study.<sup>[19]</sup> In other words, regardless of capacity of the township hospital,  
41  
42 285 readmission is unavoidable and occurs under the same rate; in theory, TC readmission  
43  
44 286 resulted from the doctors' assessment of their treatment ability, or deterioration of disease  
45  
46 287 rather than the general hospital capacity.<sup>[20]</sup>  
47  
48  
49  
50  
51  
52  
53

54 288 In general, patients were more likely to be readmitted to a county hospital if they were in  
55  
56  
57  
58  
59  
60

1  
2  
3  
4 289 an older age group, found travel to a county hospital more convenient, had lower expenses,  
5  
6 290 had a shorter interval between admissions or diseases that were harder to assess. The ratio  
7  
8 291 of patients choosing to be readmitted to a county hospital increased with age, which may  
9  
10 292 be a result of the increased attention to the cure rate among those of more advanced age.  
11  
12  
13 293 The OR for travel time to a county hospital was 0.97, indicating that patients made their  
14  
15 294 choice based on convenience.<sup>[16-19]</sup> The most obvious influencing factors were first LOS  
16  
17 295 and the interval between admissions. These factors can be combined to discuss the  
18  
19  
20 296 difference in choice. The average first LOS in the TT group was 9.23 days, which is close  
21  
22 297 to 9.7 days, the standard LOS in township hospitals in China.<sup>[15]</sup> Moreover, the average  
23  
24 298 interval between admissions was 14.95 days. In the TC group, the average first LOS was  
25  
26 299 6.96 days and the interval between admissions was 6.03 days. A shorter first LOS ( $OR =$   
27  
28 300 0.96) and a shorter the interval between admissions ( $OR = 0.90$ ) was associated with a  
29  
30 301 greater likelihood of choosing a county hospital. This disparity may be associated with the  
31  
32 302 degree of urgency of the disease. Patients with diseases related to the urinary system ( $OR =$   
33  
34 303 2.68) and haematological disorders ( $OR = 10.03$ ) were more likely to choose a county  
35  
36 304 hospital compared with patients with cancer, respiratory diseases and other disease types.  
37  
38 305 This finding may be related to township doctor assessment regarding treatment ability.  
39  
40 306 Diseases in the urinary system, cardiovascular system and haematological disorders cannot  
41  
42 307 be controlled well in township hospitals, leading to a higher rate of inaccurate assessments  
43  
44 308 and a higher probability of readmission to a county hospital.<sup>[21]</sup> Respiratory and digestive  
45  
46 309 diseases (e.g. influenza, paediatric bronchial pneumonia and chronic obstructive  
47  
48 310 pulmonary disease<sup>[22]</sup>) have a high incidence and recurrence rate and can be controlled in  
49  
50  
51  
52  
53  
54  
55  
56  
57  
58  
59  
60

1  
2  
3  
4 311 township hospitals. However, these diseases often have failed treatment outcomes because  
5  
6 312 of poor patient compliance on medicine and after-care.<sup>[23]</sup> Consequently, these patients  
7  
8 313 may be more likely to choose county hospitals for readmission. Moreover, readmissions  
9  
10 314 tended to move toward county hospitals as year increased ( $OR = 1.14$ ), which implies an  
11  
12 315 endogenous factor as affected the increase of inpatients in county hospitals in recent years.

### 16 316 **Identifying forms of TC readmission**

19 317 We could differentiate TC admission from TT admission by first LOS and interval between  
20  
21 318 admissions. Intervals in TC patient admission showed a U-shaped distribution; 61.1% were  
22  
23 319 readmitted to a county hospital within 3 days, and a small prevalence peak appeared in the  
24  
25 320 group after more than 15 days. Correspondently, 50.1% of patients in the TT group had an  
26  
27 321 interval between admissions of more than 15 days. Therefore, a considerable proportion of  
28  
29 322 early readmissions might be referrals; patients readmitted after a short first LOS with a  
30  
31 323 short interval may be assumed to have been referred by doctors. A long first LOS and long  
32  
33 324 interval were more likely to indicate a TC caused by individual choice, meaning an  
34  
35 325 inappropriate TC readmission. Longer first LOS means a complete treatment in township  
36  
37 326 hospital, and longer interval indicates readmission may have been caused by poor  
38  
39 327 compliance on medicine and after-care from patients themselves or a normal disease  
40  
41 328 recurrence. Therefore, a combination of first LOS and interval may be an effective  
42  
43 329 identification index; we used 1 week as the cut-off value (Table 3). TC readmissions based  
44  
45 330 on a doctor's incorrect assessment accounted for approximately 70.7% of admissions  
46  
47 331 (interval between admissions <7 days), and those caused by patients accounted for 29.3%  
48  
49 332 (interval between admissions >7 days).



1  
2  
3  
4 333 The sample county is a typical rural area, and this research is a population based study, so  
5  
6 334 the results could present the TC phenomenon in all rural China.  
7  
8

## 9 335 **Conclusions**

10  
11  
12 336 Patients were more likely to choose a county hospital for readmission over time. TC  
13  
14 337 readmission remains a common health service use in rural China, and may result in  
15  
16  
17 338 inappropriate patient flows. Differences in readmission choices were associated with age,  
18  
19 339 travel time to county hospital, first LOS, interval between admissions and diseases; all of  
20  
21  
22 340 these factors are easy to identify. Combination of first LOS and interval between  
23  
24  
25 341 admissions could be an effective identification index for the forms of TC readmission.  
26  
27

## 28 342 **Limitations**

29  
30  
31 343 Our study has several limitations. Hospitalisation information, geographical factors,  
32  
33 344 interval status and disease were all entered into the logistic regression model. However,  
34  
35 345 some individual factors (e.g. economic status, education and preference) were not available.  
36  
37  
38 346 Moreover, influence on choice of hospitals may reflect an accumulated process, meaning  
39  
40  
41 347 that the more patients experience TC readmission, the more significant the influence would  
42  
43 348 become. However, we only studied the influence of the first TC readmission in a single  
44  
45  
46 349 year. These limitations may bring instability to our study and need to be resolved in future  
47  
48 350 studies.  
49

## 50 351 **Competing interests**

51  
52  
53 352 The authors have declared that no competing interests exist.  
54  
55  
56  
57  
58  
59  
60

## 353 **Authors' contributions**

354 Y.Z. and L.Z. participated in conception and design, and the analyses, and wrote the  
355 manuscript. Y-D.N. participated in data collection and performed the statistical analysis.  
356 L.Z. helped to draft the manuscript, reviewed the manuscript and made final changes. All  
357 authors have given their final approval of the version to be published.

## 358 **Funding statement**

359 This research is supported by the National Youth Natural Science Foundation of China  
360 (Grant No.: 71603088).

## 361 **Disclosure**

362 No past publication history, no past presentation history

## 363 **Provenance and peer review**

364 Not commissioned; externally peer reviewed.

## 365 **Data sharing statement**

366 The anonymized dataset is available through the email of the corresponding author.

367

368

## **References:**

369 [1] Barnett ML, Hsu J, McWilliams JM. Patient Characteristics and Differences in Hospital Readmission  
370 Rates. JAMA INTERNAL MEDICINE. 2015;**175**(11):1803-1812.

371 [2] Sheingold SH, Zuckerman R, Shartz A. Understanding Medicare Hospital Readmission Rates And  
372 Differing Penalties Between Safety-Net And Other Hospitals. HEALTH AFFAIRS. 2016;**35**(1):124-131.

373 [3] Tsai TC, Joynt KE, Orav EJ, Gawande AA, Jha AK. Variation in Surgical-Readmission Rates and  
374 Quality of Hospital Care. NEW ENGLAND JOURNAL OF MEDICINE. 2013;**369**(12):1134-1142.

375 [4] Berry JG, Toomey SL, Zaslavsky AM, Jha AK, et al. Pediatric Readmission Prevalence and Variability  
376 Across Hospitals. JAMA-JOURNAL OF THE AMERICAN MEDICAL ASSOCIATION.  
377 2013;**309**(4):372-380.

378 [5] Zhang Y, Zhang L, Tang W, Sun X. Research on Global Budget on One Certain Disease in Multilevel  
379 Institutions: Integrated Care Orientation. INTERNATIONAL JOURNAL OF INTEGRATED CARE.  
380 2013;**13S**.

- 1  
2  
3 381 [6] Tsugawa Y, Jena AB, Figueroa JF, Orav EJ, Blumenthal DM, Jha AK. Comparison of Hospital  
4 382 Mortality and Readmission Rates for Medicare Patients Treated by Male vs Female Physicians. JAMA  
5 383 INTERNAL MEDICINE. 2017;**177**(2):206-213.
- 6 384 [7] Li X, Lu JP, Hu S, Cheng KK, et al. The primary health-care system in China. LANCET.  
7 385 2017;**390**(10112):2584-2594ELSEVIER SCIENCE INC.
- 8 386 [8] van Walraven C, Dhalla IA, Bell C, Etchells E, et al. Derivation and validation of an index to predict  
9 387 early death or unplanned readmission after discharge from hospital to the community. CANADIAN  
10 388 MEDICAL ASSOCIATION JOURNAL. 2010;**182**(6):551-557.
- 11 389 [9] Brown PH, Theoharides C. HEALTH-SEEKING BEHAVIOR AND HOSPITAL CHOICE IN  
12 390 CHINA'S NEW COOPERATIVE MEDICAL SYSTEM. HEALTH ECONOMICS. 2009;**18**:S47-S64.
- 13 391 [10] Campbell J. Inappropriate admissions: thoughts of patients and referring doctors. J R Soc Med.  
14 392 2001;**94**(12):628-6312001-12-01].
- 15 393 [11] Zhang YT, Tang WX, Zhang Y, Liu LL, Zhang L. Effects of integrated chronic care models on  
16 394 hypertension outcomes and spending: a multi-town clustered randomized trial in China. BMC PUBLIC  
17 395 HEALTH. 2017;**17**(244)BIOMED CENTRAL LTD.
- 18 396 [12] Zhang Y, Chen Y, Zhang X, Zhang L. Current level and determinants of inappropriate admissions to  
19 397 township hospitals under the new rural cooperative medical system in China: a cross-sectional study. BMC  
20 398 HEALTH SERVICES RESEARCH. 2014;**14**(649).
- 21 399 [13] Zhang Yan YTZL. Exploration of the hierarchical integration of rural medical institutions. Chinese  
22 400 Journal of Hospital Administration. 2016;**8**(32):614-617 'doi': 10.3760/cma.j.issn.1000-6672.2016.08.018[.  
23 401 [14] Ye T, Sun XW, Tang WX, Miao Y, Zhang YD, Zhang L. Effect of continuity of care on health-related  
24 402 quality of life in adult patients with hypertension: a cohort study in China. BMC HEALTH SERVICES  
25 403 RESEARCH. 2016;**16**(674)BIOMED CENTRAL LTD.
- 26 404 [15] NHaFPCoC. *2017 China Statistics Yearbook of Health and Family Planning*. Beijing: China union  
27 405 medical university press, 2017.
- 28 406 [16] Herrin J, St Andre J, Kenward K, Joshi MS, Audet AJ, Hines SC. Community Factors and Hospital  
29 407 Readmission Rates. HEALTH SERVICES RESEARCH. 2015;**50**(1):20-39.
- 30 408 [17] Longford NT. Improved approximations for multilevel models with binary responses. JOURNAL OF  
31 409 THE ROYAL STATISTICAL SOCIETY SERIES A-STATISTICS IN SOCIETY. 1997;**160**(3):593.
- 32 410 [18] Lim SL, Ong KCB, Chan YH, Loke WC, Ferguson M, Daniels L. Malnutrition and its impact on cost of  
33 411 hospitalization, length of stay, readmission and 3-year mortality. CLINICAL NUTRITION.  
34 412 2012;**31**(3):345-350.
- 35 413 [19] Calvillo-King L, Arnold D, Eubank KJ, Lo M, et al. Impact of Social Factors on Risk of Readmission or  
36 414 Mortality in Pneumonia and Heart Failure: Systematic Review. JOURNAL OF GENERAL INTERNAL  
37 415 MEDICINE. 2013;**28**(2):269-282.
- 38 416 [20] Kogan AC, Koons E, Enguidanos S. Investigating the Impact of Intervention Refusal on Hospital  
39 417 Readmission. AMERICAN JOURNAL OF MANAGED CARE. 2017;**23**(12):E394-E401.
- 40 418 [21] Ross JS, Chen J, Lin Z, Bueno H, et al. Recent National Trends in Readmission Rates After Heart  
41 419 Failure Hospitalization. CIRCULATION-HEART FAILURE. 2010;**3**(1):97-103.
- 42 420 [22] Hartl S, Luis Lopez-Campos J, Pozo-Rodriguez F, Castro-Acosta A, et al. Risk of death and  
43 421 readmission of hospital-admitted COPD exacerbations: European COPD Audit. EUROPEAN  
44 422 RESPIRATORY JOURNAL. 2016;**47**(1):113-121.
- 45 423 [23] Vo D, Zurakowski D, Faraoni D. Incidence and predictors of 30-day postoperative readmission in  
46 424 children. PEDIATRIC ANESTHESIA. 2018;**28**(1):63-70.

1  
2  
3 425  
4  
5

6 426 **Figure Legend**  
7

8 427 **Figure 1.** Map of Qianjiang district: geographic distribution  
9  
10  
11  
12  
13  
14  
15  
16  
17  
18  
19  
20  
21  
22  
23  
24  
25  
26  
27  
28  
29  
30  
31  
32  
33  
34  
35  
36  
37  
38  
39  
40  
41  
42  
43  
44  
45  
46  
47  
48  
49  
50  
51  
52  
53  
54  
55  
56  
57  
58  
59  
60

For peer review only

1  
2  
3  
4  
5  
6  
7  
8  
9  
10  
11  
12  
13  
14  
15  
16  
17  
18  
19  
20  
21  
22  
23  
24  
25  
26  
27  
28  
29  
30  
31  
32  
33  
34  
35  
36  
37  
38  
39  
40  
41  
42  
43  
44  
45  
46  
47  
48  
49  
50  
51  
52  
53  
54  
55  
56  
57  
58  
59  
60



Map of Qianjiang distract: geographic distribution

136x113mm (600 x 600 DPI)

only

**STROBE 2007 (v4) Statement—Checklist of items that should be included in reports of *cross-sectional studies***

| Section/Topic                | Item # | Recommendation                                                                                                                                                                       | Reported on Line #   |
|------------------------------|--------|--------------------------------------------------------------------------------------------------------------------------------------------------------------------------------------|----------------------|
| <b>Title and abstract</b>    | 1      | (a) Indicate the study's design with a commonly used term in the title or the abstract                                                                                               | <b>Lines:1-2</b>     |
|                              |        | (b) Provide in the abstract an informative and balanced summary of what was done and what was found                                                                                  | <b>Lines:22-58</b>   |
| <b>Introduction</b>          |        |                                                                                                                                                                                      |                      |
| Background/rationale         | 2      | Explain the scientific background and rationale for the investigation being reported                                                                                                 | <b>Lines:60-126</b>  |
| Objectives                   | 3      | State specific objectives, including any prespecified hypotheses                                                                                                                     | <b>Lines:126-129</b> |
| <b>Methods</b>               |        |                                                                                                                                                                                      |                      |
| Study design                 | 4      | Present key elements of study design early in the paper                                                                                                                              | <b>Lines:152-154</b> |
| Setting                      | 5      | Describe the setting, locations, and relevant dates, including periods of recruitment, exposure, follow-up, and data collection                                                      | <b>Lines:131-143</b> |
| Participants                 | 6      | (a) Give the eligibility criteria, and the sources and methods of selection of participants                                                                                          | <b>Lines:145-147</b> |
| Variables                    | 7      | Clearly define all outcomes, exposures, predictors, potential confounders, and effect modifiers. Give diagnostic criteria, if applicable                                             | <b>Lines:148-152</b> |
| Data sources/<br>measurement | 8*     | For each variable of interest, give sources of data and details of methods of assessment (measurement). Describe comparability of assessment methods if there is more than one group | <b>Lines:152-166</b> |
| Bias                         | 9      | Describe any efforts to address potential sources of bias                                                                                                                            | <b>No</b>            |
| Study size                   | 10     | Explain how the study size was arrived at                                                                                                                                            | <b>Lines:167-168</b> |
| Quantitative variables       | 11     | Explain how quantitative variables were handled in the analyses. If applicable, describe which groupings were chosen and why                                                         | <b>Lines:169-177</b> |
| Statistical methods          | 12     | (a) Describe all statistical methods, including those used to control for confounding                                                                                                | <b>Lines:178-180</b> |
|                              |        | (b) Describe any methods used to examine subgroups and interactions                                                                                                                  | <b>Lines:180-190</b> |
|                              |        | (c) Explain how missing data were addressed                                                                                                                                          | <b>No</b>            |
|                              |        | (d) If applicable, describe analytical methods taking account of sampling strategy                                                                                                   | <b>No</b>            |
|                              |        | (e) Describe any sensitivity analyses                                                                                                                                                | <b>No</b>            |
| <b>Results</b>               |        |                                                                                                                                                                                      |                      |

|                          |     |                                                                                                                                                                                                              |                                   |
|--------------------------|-----|--------------------------------------------------------------------------------------------------------------------------------------------------------------------------------------------------------------|-----------------------------------|
| Participants             | 13* | (a) Report numbers of individuals at each stage of study—eg numbers potentially eligible, examined for eligibility, confirmed eligible, included in the study, completing follow-up, and analysed            | <b>Lines:197-204</b>              |
|                          |     | (b) Give reasons for non-participation at each stage                                                                                                                                                         | <b>No</b>                         |
|                          |     | (c) Consider use of a flow diagram                                                                                                                                                                           | <b>No</b>                         |
| Descriptive data         | 14* | (a) Give characteristics of study participants (eg demographic, clinical, social) and information on exposures and potential confounders                                                                     | <b>Lines:218-234</b>              |
|                          |     | (b) Indicate number of participants with missing data for each variable of interest                                                                                                                          | <b>No</b>                         |
| Outcome data             | 15* | Report numbers of outcome events or summary measures                                                                                                                                                         | <b>Lines:198-201</b>              |
| Main results             | 16  | (a) Give unadjusted estimates and, if applicable, confounder-adjusted estimates and their precision (eg, 95% confidence interval). Make clear which confounders were adjusted for and why they were included | <b>Lines:235-250</b>              |
|                          |     | (b) Report category boundaries when continuous variables were categorized                                                                                                                                    | <b>Lines:235-250</b>              |
|                          |     | (c) If relevant, consider translating estimates of relative risk into absolute risk for a meaningful time period                                                                                             | <b>No</b>                         |
| Other analyses           | 17  | Report other analyses done—eg analyses of subgroups and interactions, and sensitivity analyses                                                                                                               | <b>Lines:209-217</b>              |
| <b>Discussion</b>        |     |                                                                                                                                                                                                              |                                   |
| Key results              | 18  | Summarise key results with reference to study objectives                                                                                                                                                     | <b>Lines:252-271;<br/>332-338</b> |
| Limitations              | 19  | Discuss limitations of the study, taking into account sources of potential bias or imprecision. Discuss both direction and magnitude of any potential bias                                                   | <b>Lines:339-347</b>              |
| Interpretation           | 20  | Give a cautious overall interpretation of results considering objectives, limitations, multiplicity of analyses, results from similar studies, and other relevant evidence                                   | <b>Lines:272-328</b>              |
| Generalisability         | 21  | Discuss the generalisability (external validity) of the study results                                                                                                                                        | <b>Lines:329-331</b>              |
| <b>Other information</b> |     |                                                                                                                                                                                                              |                                   |
| Funding                  | 22  | Give the source of funding and the role of the funders for the present study and, if applicable, for the original study on which the present article is based                                                | <b>Lines:356-357</b>              |

\*Give information separately for cases and controls in case-control studies and, if applicable, for exposed and unexposed groups in cohort and cross-sectional studies.

**Note:** An Explanation and Elaboration article discusses each checklist item and gives methodological background and published examples of transparent reporting. The STROBE checklist is best used in conjunction with this article (freely available on the Web sites of PLoS Medicine at <http://www.plosmedicine.org/>, Annals of Internal Medicine at <http://www.annals.org/>, and Epidemiology at <http://www.epidem.com/>). Information on the STROBE Initiative is available at [www.strobe-statement.org](http://www.strobe-statement.org).
